# Supplementary material for: Assessment of the genetic and clinical determinants of fracture risk: genome wide association and mendelian randomisation study
Source: PubMed Central journal article supplement (PMC6113773; doi:10.1136/bmj.k3225), 2018-08-29
Supplement: trak043508.ww.pdf [file trak043508.ww.pdf]

## **SUPPLEMENTARY NOTE**

### **CONTENT**

- I. Full authorship details
- II. Supplementary tables
- III. Supplementary figures
- IV. Full acknowledgements

## I. Full authorship details

### Assessment of the genetic and clinical determinants of fracture risk: a Mendelian randomization approach

Katerina Trajanoska PhD student<sup>1,2\*</sup>, John A. Morris PhD student<sup>3,4\*</sup>, Ling Oei assistant professor<sup>1,2\*</sup>, Hou-Feng Zheng professor<sup>5,6\*</sup>, David M. Evans professor<sup>7,8\*\*</sup>, Douglas P. Kiel professor<sup>9,10\*\*</sup>, Claes Ohlsson professor<sup>11\*\*</sup>, J. Brent Richards professor<sup>3,4\*\*</sup> and Fernando Rivadeneira associate professor<sup>1,2\*\*</sup> on behalf of GEFOS/GENOMOS consortium and the 23andMe research team

<sup>1</sup> Department of Internal Medicine, Erasmus MC, University Medical Center, Rotterdam, The Netherlands.

<sup>2</sup> Department of Epidemiology, Erasmus MC, University Medical Center, Rotterdam, The Netherlands.

<sup>3</sup> Lady Davis Institute, Jewish General Hospital, McGill University, Montréal, Québec, Canada.

<sup>4</sup> Department of Human Genetics, McGill University, Montréal, Québec, Canada.

<sup>5</sup> Institute of Basic Medical Sciences, DaP Lab, School of Life Sciences, Westlake University and Westlake Institute for Advanced Study, Westlake University, Hangzhou, Zhejiang, China.

<sup>6</sup> Institute of Aging Research and the Affiliated Hospital, School of Medicine, Hangzhou Normal University, Hangzhou, Zhejiang, China.

<sup>7</sup> MRC Integrative Epidemiology Unit, University of Bristol, Bristol, UK.

<sup>8</sup> The University of Queensland Diamantina Institute, The University of Queensland, Translational Research Institute, Brisbane, Australia.

<sup>9</sup> Institute for Aging Research, Hebrew SeniorLife, Harvard Medical School, Boston, Massachusetts, USA

<sup>10</sup> Department of Medicine, Beth Israel Deaconess Medical Center and Harvard Medical School, Boston, MA, USA

<sup>11</sup> Centre for Bone and Arthritis Research, Department of Internal Medicine, Institute of Medicine, Sahlgrenska, Gothenburg, Sweden

\*These authors contributed equally

\*\*These authors jointly supervised this work

Full details of coauthors and affiliations listed in the endmatter:

**The following members of GEFOS/GENOMOS consortium and the 23andMe team are co-authors of this manuscript:** Vincenzo Forgetta research associate<sup>1</sup>, Aaron Leong endocrinologist<sup>2,3</sup>, Omar S. Ahmad scientist<sup>4</sup>, Charles Laurin postdoctoral researcher<sup>5</sup>, Lauren E. Mokry scientist<sup>1</sup>, Stephanie Ross scientist<sup>6</sup>, Cathy E. Elks scientist<sup>5,7</sup>, Jack Bowden programme leader<sup>5</sup>, Nicole M. Warrington NHMRC early career researcher<sup>8</sup>, Aaron Kleinman senior scientist<sup>9</sup>, Sara M. Willems scientist<sup>10</sup>, Daniel Wright PhD student<sup>10</sup>, Felix R. Day career development fellow<sup>10</sup>, Anna Murray associate professor<sup>11</sup>, Katherine S. Ruth research fellow<sup>11</sup>, Konstantinos K. Tsilidis assistant professor<sup>12,13</sup>, Cheryl L. Ackert-Bicknell associate professor<sup>14</sup>, J.H. Duncan Bassett professor<sup>15</sup>, Bram C.J. van der Eerden assistant professor<sup>16</sup>, Kaare M. Gautvik medical consultant<sup>18,19</sup>, Sjur Reppe senior researcher<sup>18,20</sup>, Graham R. Williams professor<sup>15</sup>, Carolina Medina-Gómez postdoctoral researcher<sup>17,21</sup>, Karol Estrada scientific researcher<sup>17</sup>, Najaf Amin associate professor<sup>21</sup>, Joshua C. Bis scientific researcher<sup>22</sup>, Stephan Breda PhD student<sup>23</sup>, Daniel I. Chasman associate professor<sup>24,25</sup>, Serkalem Demissie associate professor<sup>26</sup>, Anke W. Enneman scientist<sup>17</sup>, Yi-Hsiang Hsu associate scientist<sup>27,28,29</sup>, Thorvaldur Ingvarsson associate professor<sup>30,31</sup>, Mika Kähönen professor<sup>32,33</sup>, Candace Kammerer associate professor<sup>34</sup>, Andrea Z. LaCroix professor<sup>35</sup>, Guo Li scientist<sup>22</sup>, Ching-Ti Liu associate professor<sup>26</sup>, Yongmei Liu researcher<sup>36</sup>, Mattias Lorentzon professor<sup>37</sup>, Reedik Mägi senior scientist<sup>38</sup>, Evelin Mihailov scientist<sup>38</sup>, Lili Mlani research professor<sup>38</sup>, Alireza Moayyeri honorary research associate<sup>39</sup>, Carrie M. Nielson associate professor<sup>40</sup>, Nerea Alonso postdoctoral researcher<sup>41</sup>, Pack Chung Sham professor<sup>42</sup>, Kristin Siggeirsdotir managing director of development<sup>43</sup>, Gunnar Sigurdsson professor<sup>44,45</sup>, Unnur Thorsteinsdottir vice president of research<sup>45,46</sup>, Stella Trompet assistant professor<sup>47,48</sup>, Gudmar Thorleifsson researcher<sup>46</sup>, Liesbeth Vandenput associate professor<sup>49</sup>, Nathalie van der Velde geriatrician consultant<sup>17,50</sup>, Jorma Viikari professor<sup>51,52</sup>, Su-Mei Xiao

scientist<sup>53</sup>, Jing Hua Zhao senior investigator scientist<sup>10</sup>, Kristina E. Akesson professor<sup>54</sup>, Marianne Andersen professor<sup>55</sup>, Biljana Atanasovska PhD student<sup>56</sup>, Susana Balcells professor<sup>57</sup>, Joel Eriksson senior lecturer<sup>49</sup>, Melissa M. Formosa postdoctoral researcher<sup>58</sup>, Carmen Garcia-Ibarbia medical doctor<sup>59,60</sup>, Jesús Gonzalez-Macias medical doctor<sup>59,60</sup>, Natalia Garcia-Giralt postdoctoral researcher<sup>61</sup>, Goran Hallmans professor<sup>62</sup>, Magnus Karlsson professor<sup>54,63</sup>, Rita Khusainova researcher<sup>64</sup>, Beom-Jun Kim associate professor<sup>65</sup>, Timothy C.Y. Kwok professor<sup>66</sup>, Seung Hun Lee associate professor<sup>65</sup>, Ping C. Leung researcher<sup>67</sup>, Hans Mallmin adjunct professor<sup>68</sup>, Laura Masi senior researcher<sup>69,70</sup>, Beatrice S. Melin professor<sup>63</sup>, Simona Mencej-Bedrac HTA and pricing expert<sup>71</sup>, Maria Nethander statistician<sup>49,72</sup>, José M. Olmos assistant professor<sup>59,60</sup>, Panagoula Kollia associate professor<sup>73</sup>, Janez Prezelj retired<sup>74</sup>, Natasja M. van Schoor assistant professor<sup>75</sup>, Olle Svensson professor emeritus<sup>76</sup>, Pawel Szulc senior researcher<sup>77</sup>, Carmen Valero medical doctor<sup>59,60</sup>, Jean Woo professor<sup>66</sup>, Maria Brandi professor<sup>78</sup>, Sulin Cheng professor<sup>79</sup>, Roland Chapurlat professor<sup>77</sup>, Claus Christiansen chairman<sup>80</sup>, Cyrus Cooper professor<sup>81</sup>, George Dedoussis professor<sup>82</sup>, John A. Eisman professor<sup>83</sup>, Morten Frost senior scientist<sup>55</sup>, Sylvie Giroux research assistant<sup>84</sup>, Daniel Grinberg professor<sup>57</sup>, David Goltzman professor<sup>85</sup>, Lynne J. Hocking senior scientist<sup>86</sup>, Wim Van Hul professor<sup>87</sup>, Jung-Min Koh professor<sup>65</sup>, Lars Rejnmark professor<sup>88</sup>, Jens-Erik B. Jensen head of department<sup>88</sup>, Bente Langdahl professor<sup>88</sup>, Joshua R. Lewis national health and medical research council career development fellow<sup>89,90,91</sup>, Roman S. Lorenc retired<sup>92</sup>, Elza Khusnutdinova professor<sup>64,93</sup>, Janja Marc professor<sup>71</sup>, Fiona E. McGuigan associate professor<sup>54</sup>, Dan Mellström professor<sup>49</sup>, Karl Michaelsson professor<sup>68</sup>, Xavier Nogues head of department<sup>61</sup>, Peter Nordström professor<sup>94</sup>, Barbara Obermayer-Pietsch professor<sup>95</sup>, Ulrika Pettersson-Kymmer associate professor<sup>96</sup>, Richard L. Prince professor<sup>90,97</sup>, Jonathan Reeve honorary senior research fellow<sup>98</sup>, David M. Reid professor<sup>86</sup>, Jose A. Riancho director<sup>59,60</sup>, Francois Rousseau professor<sup>84</sup>, Nelson L.S. Tang professor<sup>99</sup>, Angela Xuereb-Anastasi professor<sup>58</sup>, William D. Leslie professor<sup>100</sup>, Daniel S. Evans scientist<sup>101</sup>, Steven R. Cummings professor<sup>101</sup>, Jane Cauley professor<sup>102</sup>, Cornelia M van Duijn professor<sup>21</sup>, Matt Brown professor<sup>103</sup>, Emma L. Duncan professor<sup>103,104</sup>, Lisette CPGM. de Groot professor<sup>105</sup>, Tonu Esko deputy director of research<sup>38,106</sup>, Vilmundur Gudnason professor<sup>43,45</sup>, Tamara B. Harris chief of the interdisciplinary studies<sup>107</sup>, Rebecca D. Jackson professor<sup>108</sup>, J. Wouter Jukema professor<sup>47</sup>, M. Arfan Ikram professor<sup>21</sup>, David Karasik professor<sup>27,109</sup>, Stephen Kaptoge senior statistician<sup>39</sup>, Kay-Tee Khaw professor<sup>39,110</sup>, Annie Wai-Chee Kung professor<sup>53</sup>, Terho Lehtimäki professor<sup>111,112</sup>, Leo-Pekka Lyytikäinen researcher<sup>111,112</sup>, Paul Lips professor<sup>113</sup>, Robert Luben<sup>39</sup>, Andres Metspalu professor<sup>38,114</sup>, Joyce B. J. van Meurs associate professor<sup>17</sup>, Ryan L. Minster assistant professor<sup>34</sup>, Eric Orwoll professor<sup>115</sup>, Edwin Oei radiologist<sup>23</sup>, Bruce M. Psaty professor<sup>116,117</sup>, Olli T. Raitakari professor<sup>118,119</sup>, Stuart H. Ralston professor<sup>41</sup>, Paul M. Ridker professor<sup>24,25</sup>, John A. Robbins professor<sup>120</sup>, Albert V. Smith senior researcher<sup>43,45</sup>, Tim D. Spector professor<sup>121</sup>, Unnur Styrkarsdottir senior scientist<sup>48</sup>, Joseph Zmuda associate professor<sup>102</sup>, Gregory J. Tranah senior scientist<sup>101</sup>, Kari Stefansson CEO<sup>44,46</sup>, Andre G. Uitterlinden professor<sup>17,21</sup>, M. Carola Zillikens associate professor<sup>17</sup>, Evangelia E. Ntzani associate professor<sup>12,122</sup>, Evangelos Evangelou associate professor<sup>12,13</sup>, John PA. Ioannidis professor<sup>123</sup>, John R.B. Perry programme leader track<sup>10</sup>, Joyce Y. Tung vice president of research<sup>9</sup>, David A. Hinds research fellow<sup>9</sup>, Robert A Scott senior scientist<sup>10</sup>

<sup>1</sup> Centre for Clinical Epidemiology, Lady Davis Institute, Jewish General Hospital, McGill University, Montréal, Québec, Canada.

<sup>2</sup> Division of General Internal Medicine, Massachusetts General Hospital, Boston, Massachusetts, USA.

<sup>3</sup> Department of Medicine, Harvard Medical School, Boston, Massachusetts, USA.

<sup>4</sup> Department of Medicine, McGill University Montréal, Québec, Canada.

<sup>5</sup> MRC Integrative Epidemiology Unit, University of Bristol, Bristol, UK.

<sup>6</sup> Departments of Clinical Epidemiology and Biostatistics, McMaster University, Hamilton, Ontario, Canada.

<sup>7</sup> Personalised Healthcare & Biomarkers, Innovative Medicines and Early Development Biotech Unit, AstraZeneca, Cambridge.

<sup>8</sup> The University of Queensland Diamantina Institute, The University of Queensland, Translational Research Institute, Brisbane, Australia.

<sup>9</sup> Department of Research, 23andMe, Mountain View, California, USA.

<sup>10</sup> MRC Epidemiology Unit, University of Cambridge School of Clinical Medicine, Cambridge, UK.

<sup>11</sup> Genetics of Complex Traits, University of Exeter Medical School, University of Exeter, Exeter, UK.

- 12 Department of Hygiene and Epidemiology, University of Ioannina Medical School, Ioannina, Greece.
- 13 Department of Epidemiology and Biostatistics, Imperial College London, Faculty of Medicine, School of Public Health, London, UK.
- 14 Center for Musculoskeletal Research, Department of Orthopaedics, University of Rochester, Rochester, New York, USA.
- 15 Molecular Endocrinology Laboratory, Department of Medicine, Imperial College London, London, UK .
- 16 Department of Internal Medicine, Laboratory for Calcium and Bone Metabolism, Erasmus MC, University Medical Center, Rotterdam, The Netherlands.
- 17 Department of Internal Medicine, Erasmus MC, University Medical Center, Rotterdam, The Netherlands.
- 18 Unger-Vetlesen Institute, Lovisenberg Diakonale Hospital, Oslo, Norway.
- 19 Institute of Basic Medical Sciences, University of Oslo, Oslo, Norway.
- 20 Department of Medical Biochemistry, Oslo University Hospital, Oslo, Norway.
- 21 Department of Epidemiology, Erasmus MC, University Medical Center, Rotterdam, The Netherlands.
- 22 Cardiovascular Health Research Unit, Department of Medicine, University of Washington, Seattle, Washington, USA.
- 23 Department of Radiology and Nuclear Medicine, Erasmus MC, University Medical Center, Rotterdam, The Netherlands.
- 24 Division of Preventive Medicine, Brigham and Women's Hospital, Boston, Massachusetts, USA.
- 25 Harvard Medical School, Boston, Massachusetts, USA.
- 26 Department of Biostatistics, Boston University School of Public Health, Boston, Massachusetts, USA.
- 27 Institute for Aging Research, Hebrew SeniorLife, Harvard Medical School, Boston, Massachusetts, USA.
- 28 BROAD Institute of MIT and Harvard, Cambridge, MA, USA.
- 29 Molecular and Integrative Physiological Sciences, Harvard School of Public Health, Boston, Massachusetts, USA.
- 30 Department of Orthopedic Surgery, Akureyri Hospital, Akureyri, Iceland.
- 31 Institution of Health Science, University of Akureyri, Akureyri, Iceland.
- 32 Department of Clinical Physiology, Tampere University Hospital, Tampere, Finland.
- 33 Department of Clinical Physiology, Finnish Cardiovascular Research Center - Tampere, Faculty of Medicine and Life Sciences, University of Tampere, Tampere, Finland.
- 34 Department of Human Genetic, Graduate School of Public Health, University of Pittsburgh, Pittsburgh, Pennsylvania, USA.
- 35 Department of Family Medicine and Public Health, University of California – San Diego, San Diego, California, USA.
- 36 Department of Epidemiology and Prevention, Division of Public Health Sciences, Wake Forest University, Winston-Salem, North Carolina, USA.
- 37 Geriatric Medicine, Department of Internal Medicine and Clinical Nutrition Institute of Medicine, University of Gothenburg, Mölndal, Sweden.
- 38 Estonian Genome Center, University of Tartu, Tartu, Estonia.
- 39 Department of Public Health and Primary Care, University of Cambridge, Cambridge, UK.
- 40 School of Public Health, Oregon Health & Science University, Portland, Oregon, USA.
- 41 Institute of Genetics and Molecular Medicine, University of Edinburgh, Edinburgh, UK.
- 42 Department of Psychiatry, The University of Hong Kong, Hong Kong, China.
- 43 Icelandic Heart Association and University of Iceland, Kopavogur , Iceland.
- 44 Department of Endocrinology and Metabolism, Landspítali, The National University Hospital of Iceland, Reykjavík, Iceland
- 45 Faculty of Medicine, University of Iceland, Reykjavík, Iceland.
- 46 deCODE Genetics / Amgen, Reykjavík, Iceland.
- 47 Department of Cardiology, Leiden University Medical Center, Leiden, the Netherlands.
- 48 Department of Internal Medicine, Section of Gerontology and Geriatrics, Leiden University Medical Center, Leiden, The Netherlands.
- 49 Centre for Bone and Arthritis Research, Department of Internal Medicine, Institute of Medicine, Sahlgrenska Academy, University of Gothenburg, Gothenburg, Sweden.
- 50 Department of Internal Medicine, Academic Medical Center, Amsterdam, The Netherlands.
- 51 Division of Medicine, Turku University Hospital, Turku, Finland.
- 52 Department of Medicine, University of Turku, Turku, Finland.
- 53 Department of Medicine, The University of Hong Kong, Hong Kong, China.
- 54 Clinical and Molecular Osteoporosis Research Unit, Department of Clinical Sciences, Lund University, Malmö, Sweden.
- 55 Department of Endocrinology, Odense University Hospital, Odense, Denmark.
- 56 Molecular Genetics Section, Department of Pediatrics, University Medical Center Groningen, University of Groningen, Groningen, The Netherlands.
- 57 Department of Genetics, Microbiology and Statistics, CIBERER, IBUB, IRSJD, University of Barcelona, Barcelona, Spain.
- 58 Department of Applied Biomedical Science, Faculty of Health Sciences, University of Malta, Msida, Malta.
- 59 Department of Medicine, University of Cantabria, Santander, Spain.
- 60 Department of Internal Medicine, Hospital U M Valdecilla-IDIVAL, Santander, Spain.
- 61 Musculoskeletal Research Group, IMIM (Hospital del Mar Medical Research Institute), Centro de Investigación Biomédica en Red en Fragilidad y Envejecimiento Saludable (CIBERFES), ISCIII, Barcelona, Catalonia, Spain.
- 62 Department of Public Health and Clinical Medicine, Umeå University, Umeå, Sweden.
- 63 Department of Radiation Sciences, Oncology, Umeå University, Umeå, Sweden.
- 64 Institute of Biochemistry and Genetics, Ufa Scientific Center of RAS, Ufa, Russia.

- <sup>65</sup> Division of Endocrinology and Metabolism, Asan Medical Center, University of Ulsan College of Medicine, Seoul, South Korea.
- <sup>66</sup> Department of Medicine & Therapeutics, The Chinese University of Hong Kong, Hong Kong, China.
- <sup>67</sup> Jockey Club Centre for Osteoporosis Care and Control, The Chinese University of Hong Kong, Hong Kong, China.
- <sup>68</sup> Department of Surgical Sciences, Section of Orthopedics, University Hospital, Uppsala University, Uppsala, Sweden.
- <sup>69</sup> Metabolic Bone Diseases Unit, AOUC, University Hospital of Florence, Florence, Italy.
- <sup>70</sup> Azienda Ospedaliero Universitaria Careggi (AOUC), Florence, Italy.
- <sup>71</sup> Clinical Biochemistry, University of Ljubljana, Ljubljana, Slovenia.
- <sup>72</sup> Bioinformatics Core Facility, University of Gothenburg, Gothenburg, Sweden.
- <sup>73</sup> Department of Genetics and Biotechnology, Faculty of Biology, University of Athens, Athens, Greece.
- <sup>74</sup> Department of Endocrinology, Clinical Center Ljubljana, Ljubljana, Slovenia.
- <sup>75</sup> Department of Epidemiology and Biostatistics, VU University Medical Center, Amsterdam, The Netherlands.
- <sup>76</sup> Department of Surgical and Perioperative Sciences, Umeå University, Umeå, Sweden.
- <sup>77</sup> INSERM UMR 1033, University of Lyon, Lyon, France.
- <sup>78</sup> Department of Surgery and Translational Medicine, University of Florence, Florence, Italy.
- <sup>79</sup> Faculty of Sport and Health Sciences, University of Jyväskylä, Jyväskylä, Finland.
- <sup>80</sup> Nordic Bioscience A/S, Herlev, Denmark.
- <sup>81</sup> MRC Lifecourse Epidemiology Unit, University of Southampton, Southampton, UK.
- <sup>82</sup> Department of Nutrition and Dietetics, Harokopio University, Athens, Greece.
- <sup>83</sup> Garvan Institute for Medical Research; School of Medicine Sydney, University of Notre Dame Australia, St Vincent's Hospital, Sydney, Australia.
- <sup>84</sup> Unité de Recherche en Génétique Humaine et Moléculaire and Department of molecular biology, medical biochemistry and pathology, Faculty of Medicine, CHU de Québec–Université Laval, Québec City, Canada.
- <sup>85</sup> Department of Medicine, McGill University, Montréal, Québec, Canada.
- <sup>86</sup> Musculoskeletal Research Programme, Division of Applied Medicine, University of Aberdeen, Aberdeen, UK.
- <sup>87</sup> Department of Medical Genetics, University of Antwerp, Antwerp, Belgium.
- <sup>88</sup> Department of Endocrinology and Internal Medicine, Aarhus University Hospital, Aarhus, Denmark.
- <sup>89</sup> School of Medical and Health Sciences, Edith Cowan University, Joondalup, WA, Australia.
- <sup>90</sup> Medical School, University of Western Australia, Perth, Australia.
- <sup>91</sup> School of Public Health, University of Sydney, Sydney, NSW, Australia.
- <sup>92</sup> Department of Biochemistry & Experimental Medicine, The Children's Memorial Health Institute, Warsaw, Poland.
- <sup>93</sup> Department of Genetics and Fundamental Medicine, Bashkir State University.
- <sup>94</sup> Community Medicine and Rehabilitation, Umeå University, Umeå, Sweden.
- <sup>95</sup> Department of Internal Medicine, Division of Endocrinology and Diabetology, Medical University Graz, Graz, Austria.
- <sup>96</sup> Departments of Pharmacology and Clinical Neurosciences, Umeå University, Umeå Sweden.
- <sup>97</sup> Department of Endocrinology and Diabetes, Sir Charles Gardiner Hospital, Perth, Australia.
- <sup>98</sup> Nuffield Department of Orthopaedics, Rheumatology and Musculo-skeletal Science, University of Oxford, Oxford, UK.
- <sup>99</sup> Department of Chemical Pathology, The Chinese University of Hong Kong, Hong Kong, China.
- <sup>100</sup> Departments of Internal Medicine and Radiology, University of Manitoba, Winnipeg, Canada.
- <sup>101</sup> San Francisco Coordinating Center, California Pacific Medical Center Research Institute, San Francisco, California, USA.
- <sup>102</sup> Department of Epidemiology, Graduate School of Public Health, University of Pittsburgh, Pittsburgh, Pennsylvania, USA.
- <sup>103</sup> Translational Genomics Group, Institute of Health and Biomedical Innovation, Faculty of Health, Queensland University of Technology, Translational Research Institute, Princess Alexandra Hospital, Brisbane, Australia.
- <sup>104</sup> Department of Endocrinology and Diabetes, Royal Brisbane & Women's Hospital, Butterfield St, Herston, Australia.
- <sup>105</sup> Department of Human Nutrition, Wageningen University, Wageningen, The Netherlands.
- <sup>106</sup> Population and Medical Genetics, BROAD Institute, Cambridge, MA, USA.
- <sup>107</sup> Laboratory of Epidemiology, National Institute on Aging, National Institutes of Health, Bethesda, Maryland, USA.
- <sup>108</sup> Department of Medicine, Division of Endocrinology, Diabetes and Metabolism, The Ohio State University, Columbus, Ohio, USA.
- <sup>109</sup> Faculty of Medicine in the Galilee, Bar-Ilan University, Safed, Israel.
- <sup>110</sup> Clinical Gerontology Unit, University of Cambridge, Cambridge, UK.
- <sup>111</sup> Fimlab Laboratories, Department of Clinical Chemistry, Tampere, Finland.
- <sup>112</sup> Department of Clinical Chemistry, Finnish Cardiovascular Research Center - Tampere, Faculty of Medicine and Life Sciences, University of Tampere, Tampere, Finland.
- <sup>113</sup> Department of Internal Medicine, VU University Hospital, Amsterdam, the Netherlands.
- <sup>114</sup> Institute of Molecular and Cell Biology, University Of Tartu, Tartu, Estonia.
- <sup>115</sup> Bone and Mineral Research Unit, Department of Medicine, Oregon Health & Science University, Portland, Oregon, USA.
- <sup>116</sup> Cardiovascular Health Research Unit, Departments of Epidemiology, Health Services, University of Washington, Seattle, Washington, USA.
- <sup>117</sup> Kaiser Permanente Washington Health Research Institute, Seattle, WA.
- <sup>118</sup> Department of Clinical Physiology and Nuclear Medicine, Turku University Hospital, Turku, Finland.
- <sup>119</sup> Research Centre of Applied and Preventive Cardiovascular Medicine, University of Turku, Turku, Finland.

<sup>120</sup> Department of Medicine, University of California, Davis, Sacramento, California, USA.

<sup>121</sup> Department of Twin Research and Genetic Epidemiology, King's College London, London, UK.

<sup>122</sup> Center for Evidence-based Medicine, Brown University School of Public Health, Providence, Rhode Island, USA.

<sup>123</sup> Stanford Prevention Research Center, Stanford University, Stanford, California, USA.

## Research groups:

**23andMe research team:** Michelle Agee, Babak Alipanahi, Adam Auton, Robert K. Bell, Katarzyna Bryc, Sarah L. Elson, Pierre Fontanillas, Nicholas A. Furlotte, David A. Hinds, Karen E. Huber, Aaron Kleinman, Nadia K. Litterman, Matthew H. McIntyre, Joanna L. Mountain, Elizabeth S. Noblin, Carrie A.M. Northover, Steven J. Pitts, J. Fah Sathirapongsasuti, Olga V. Sazonova, Janie F. Shelton, Suyash Shringarpure, Chao Tian, Joyce Y. Tung, Vladimir Vacic, Catherine H. Wilson.

**GEFOS/GENOMOS consortium:** Katerina Trajanoska, John A. Morris, Ling Oei, Hou-Feng Zheng, Vincenzo Forgetta, Aaron Leong, Omar S. Ahmad, Charles Laurin, Lauren E. Mokry, Stephanie Ross, Cathy E. Elks, Jack Bowden, Nicole M. Warrington, Sara M. Willems, Daniel Wright, Felix R. Day, Anna Murray, Katherine S Ruth, Konstantinos K. Tsilidis, Cheryl L. Ackert-Bicknell, J.H. Duncan Bassett, Bram C.J. van der Eerden, Kaare M. Gautvik, Sjur Reppe, Graham R. Williams, Carolina Medina-Gómez, Karol Estrada, Najaf Amin, Joshua C. Bis, Stephan Breda, Daniel I. Chasman, Serkalem Demissie, Anke W. Enneman, Yi-Hsiang Hsu, Thorvaldur Ingvarsson, Mika Kähönen, Candace Kammerer, Andrea Z. LaCroix, Guo Li, Ching-Ti Liu, Yongmei Liu, Mattias Lorentzon, Reedik Mägi, Evelin Mihailov, Lili Mlani, Alireza Moayyeri, Carrie M. Nielson, Nerea Alonso, Pack Chung Sham, Kristin Siggeirsdottir, Gunnar Sigurdsson, Unnur Thorsteinsdottir, Stella Trompet, Gudmar Thorleifsson, Liesbeth Vandenput, Nathalie van der Velde, Jorma Viikari, Su-Mei Xiao, Jing Hua Zhao, Kristina E Akesson, Marianne Andersen, Biljana Atanasovska, Susana Balcells, Joel Eriksson, Melissa M. Formosa, Carmen Garcia-Ibarbia, Jesús Gonzalez-Macias, Natalia Garcia-Giralt, Goran Hallmans, Magnus Karlsson, Rita Khusainova, Beom-Jun Kim, Timothy C.Y. Kwok, Seung Hun Lee, Ping C. Leung, Hans Mallmin, Laura Masi, Beatrice S. Melin, Simona Mencej-Bedrac, Maria Nethander, José M. Olmos, Panagoula Kollia, Janez Prezelj, Natasja M. van Schoor, Olle Svensson, Pawel Szulc, Carmen Valero, Jean Woo, Maria Brandi, Sulin Cheng, Roland Chapurlat, Claus Christiansen, Cyrus Cooper, George Dedoussis, John A. Eisman, Morten Frost, Sylvie Giroux, Daniel Grinberg, David Goltzman, Lynne J. Hocking, Wim Van Hul, Jung-Min Koh, Lars Rejnmark, Jens-Erik B. Jensen, Bente Langdahl, Joshua R. Lewis, Roman S. Lorenc, Elza Khusnutdinova, Janja Marc, Fiona E. McGuigan, Dan Mellström, Karl Michaelsson, Xavier Nogues, Peter Nordström, Barbara Obermayer-Pietsch, Ulrika Pettersson-Kymmer, Richard L. Prince, Jonathan Reeve, David M. Reid, Jose A. Riancho, Francois Rousseau, Nelson L.S. Tang, Angela Xuereb-Anastasi, William D. Leslie, Daniel S. Evans, Steven R. Cummings, Jane Cauley, Cornelia M van Duijn, Matt Brown, Emma L. Duncan, Lisette CPGM. de Groot, Tonu Esko, Vilmundur Gudnason, Tamara B. Harris, Rebecca D. Jackson, J. Wouter Jukema, M. Arfan Ikram, David Karasik, Stephen Kaptoge, Kay-Tee Khaw, Annie Wai-Chee Kung, Terho Lehtimäki, Leo-Pekka Lyytikäinen, Paul Lips, Robert Luben, Andres Metspalu, Joyce B. J. van Meurs, Ryan L Minster, Eric Orwoll, Edwin Oei, Bruce M. Psaty, Olli T. Raitakari, Stuart H. Ralston, Paul M. Ridker, John A. Robbins, Albert V. Smith, Tim D. Spector, Unnur Stykarsdottir, Joseph Zmuda, Gregory J. Tranah, Kari Stefansson, Andre G. Uitterlinden, M. Carola Zillikens, Evangelia E. Ntzani, Evangelos Evangelou, John PA. Ioannidis, John R.B. Perry, Robert A Scott, David M. Evans, Douglas P. Kiel, Claes Ohlsson, J. Brent Richards, Fernando Rivadeneira.

## II. Supplementary tables

|                   |                                                                                          |
|-------------------|------------------------------------------------------------------------------------------|
| <b>Table S1A.</b> | Descriptive study design characteristics for Discovery Cohorts                           |
| <b>Table S1B.</b> | Descriptive study design characteristics for Replication Cohorts                         |
| <b>Table S2A.</b> | Discovery study-specific descriptive statistics                                          |
| <b>Table S2B.</b> | Replication study-specific descriptive statistics                                        |
| <b>Table S3A.</b> | Discovery study-specific fracture counts                                                 |
| <b>Table S3B.</b> | Replication study-specific fracture counts                                               |
| <b>Table S4A.</b> | Genotyping/Imputation discovery                                                          |
| <b>Table S4B.</b> | Genotyping GENOMOS replication                                                           |
| <b>Table S4C.</b> | Genotyping/Imputation in silico replication                                              |
| <b>Table S5A.</b> | Number of SNPs and Variance explained by Instrumental Variables for Each Risk Factor     |
| <b>Table S5B.</b> | Individual summary statistics from the SNP-Exposure/Fracture association                 |
| <b>Table S6A.</b> | Independent Signals from the discovery phase with p-values $< 5 \times 10^{-6}$          |
| <b>Table S6B.</b> | Signals with $p < 5 \times 10^{-8}$ in the discovery followed for replication in 23andMe |
| <b>Table S6C.</b> | Meta-analysis results across stages for SNPs that did not replicate in GENOMOS           |
| <b>Table S6D.</b> | Previously identified BMD-associated loci with risk of any type of fracture              |
| <b>Table S7.</b>  | Estimates of the Genetic Correlation between Other Clinical Risk Factors and BMD         |
| <b>Table S8.</b>  | Estimating the effect of 15 Fracture Related Risk Factors on Fracture Risk               |
| <b>Table S9.</b>  | Associations of different risk factors with bone mineral density                         |

**Table S1A | Descriptive Study Design Characteristics for Discovery Cohorts**

| Short name    | Full name                                               | Study Design                                           | Country of Origin | City of Origin                                | Ethnicity              | Study Type                       | Total Sample Size with DNA and Phenotype Information (N) | Study Description                                                                                                                                                                                                                                                                                                                                                                                                                                                                                                                                                                                                                                                                                                                                       | References                                                                                                                                                                                                                     |
|---------------|---------------------------------------------------------|--------------------------------------------------------|-------------------|-----------------------------------------------|------------------------|----------------------------------|----------------------------------------------------------|---------------------------------------------------------------------------------------------------------------------------------------------------------------------------------------------------------------------------------------------------------------------------------------------------------------------------------------------------------------------------------------------------------------------------------------------------------------------------------------------------------------------------------------------------------------------------------------------------------------------------------------------------------------------------------------------------------------------------------------------------------|--------------------------------------------------------------------------------------------------------------------------------------------------------------------------------------------------------------------------------|
| <b>AGES</b>   | Age, Gene/Environment Susceptibility Reykjavik Study    | Cohort                                                 | Iceland           | Reykjavik                                     | Northern European      | Population based                 | 3185                                                     | The Age Gene/Environment Susceptibility Reykjavik Study originally comprised a random sample of 30,795 men and women born in 1907 1935 and living in Reykjavik in 1967. A total of 19,381 people attended, resulting in a 71% recruitment rate. The study sample was divided into six groups by birth year and birth date within month. One group was designated for longitudinal follow up and was examined in all stages; another was designated as a control group and was not included in examinations until 1991. Other groups were invited to participate in specific stages of the study. Between 2002 and 2006, the AGES Reykjavik study re-examined 5,764 survivors of the original cohort who had participated before in the Reykjavik Study. | [PMID: 17351290] (Harris, 2007 Age, Gene/Environment Susceptibility Reykjavik Study: multidisciplinary applied phenomics)                                                                                                      |
| <b>AOGC</b>   | Anglo-Australasian Osteoporosis Genetics Consortium     | Population cohort, and case/control for fracture cases | Australia         | Geelong                                       | North-Western European | Population based, clinical based | 2922                                                     | Population based BMD cohort (from electoral rolls) and case control for fracture cases; all drawn from Geelong general population of men and women                                                                                                                                                                                                                                                                                                                                                                                                                                                                                                                                                                                                      | [PMID: 19707703] (Henry, 2010 Bone mineral density reference ranges for Australian men: Geelong Osteoporosis Study); [PMID: 11090233] (Henry, 2000 Prevalence of osteoporosis in Australian women: Geelong Osteoporosis Study) |
| <b>BPROOF</b> | B-vitamins for the PREvention Of Osteoporotic Fractures | Intervention study                                     | The Netherlands   | Wageningen/Amsterdam/Rotterdam (multi-center) | North-Western European | General population               | 2669                                                     | B-PROOF is a trial investigating the effect of 2-year supplementation with 400 mcg folic acid and 500 mcg vitamin B12 on fracture incidence in hyperhomocysteinemic persons aged 65y and older.                                                                                                                                                                                                                                                                                                                                                                                                                                                                                                                                                         | [PMID: 22136481] (Rationale and design of the B-PROOF study, a randomized controlled trial on the effect of supplemental intake of vitamin B12 and folic acid on fracture incidence)                                           |



|                 |                                               |                 |                                                                                        |                        |                        |                                  |      |                                                                                                                                                                                                                                                                                                                                                                                                                                                                                                                                                                           |                                                                                                                                                                                                                  |
|-----------------|-----------------------------------------------|-----------------|----------------------------------------------------------------------------------------|------------------------|------------------------|----------------------------------|------|---------------------------------------------------------------------------------------------------------------------------------------------------------------------------------------------------------------------------------------------------------------------------------------------------------------------------------------------------------------------------------------------------------------------------------------------------------------------------------------------------------------------------------------------------------------------------|------------------------------------------------------------------------------------------------------------------------------------------------------------------------------------------------------------------|
| <b>CHS</b>      | Cardiovascular Health Study                   | Cohort          | Sacramento County, CA; Forsyth County, NC; Washington County, MD; Allegheny County, PA | Sacramento, Pittsburgh | European American      | Population based                 | 3261 | A population based cohort study of risk factors for coronary heart disease and stroke in adults 65 years conducted across four field centers. The original predominantly Caucasian cohort was recruited in 1989 1990 from random samples of the Medicare eligibility lists. genotyping was performed at the General Clinical Research Center's Phenotyping/Genotyping Laboratory at Cedars Sinai using the Illumina 370CNV BeadChip system on 3980 CHS participants who were free of CVD at baseline, consented to genetic testing, and had DNA available for genotyping. | [PMID: 20031568] (Fried, 2009 Cohorts for Heart and Aging Research in Genomic Epidemiology (CHARGE) Consortium: Design of prospective meta analyses of genome wide association studies from 5 cohorts)           |
| <b>DeCODE</b>   | DeCODE Genetics Study                         | Cross sectional | Iceland                                                                                | Reykjavik              | North-Western European | Population based, clinical based |      | The study includes 40,000 individuals taking part in various disease projects                                                                                                                                                                                                                                                                                                                                                                                                                                                                                             | [PMID: 18445777] (Styrkarsdottir, 2008 Multiple genetic loci for bone mineral density and fractures); [PMID: 19079262] (Styrkarsdottir, 2009 Multiple genetic loci for bone mineral density and fractures)       |
| <b>EGCUT-I</b>  | Estonian Genome Center University of Tartu-I  | Cohort          | Estonia                                                                                | Tartu                  | Northern European      | Population based                 | 4513 | Estonian Biobank is a population-based biobank of the Estonian Genome Center at the University of Tartu (EGCUT). The total cohort size is currently 51,535 gene donors ( $\geq 18$ years of age), which closely reflects the age, sex and geographical distribution of the Estonian population. Estonians represent 83%, Russians 14%, and other nationalities 3% of all participants. All subjects have been recruited randomly by general practitioners (GP) and physicians in hospitals.                                                                               | [PMID: 19424496] (Nelis, 2009 Genetic structure of Europeans: a view from the North-East); [PMID: 24518929] (Leitsalu, 2014 Cohort Profile: Estonian Biobank of the Estonian Genome Center, University of Tartu) |
| <b>EGCUT-II</b> | Estonian Genome Center University of Tartu-II | Cohort          | Estonia                                                                                | Tartu                  | Northern European      | Population based                 | 1788 | Estonian Biobank is a population-based biobank of the Estonian Genome Center at the University of Tartu (EGCUT). The total cohort size is currently 51,535 gene donors ( $\geq 18$ years of age), which closely reflects the age, sex and geographical distribution of the Estonian population. Estonians represent 83%, Russians 14%, and other nationalities 3% of all participants. All subjects have been                                                                                                                                                             | [PMID: 19424496] (Nelis, 2009 Genetic structure of Europeans: a view from the North-East); [PMID: 24518929] (Leitsalu, 2014 Cohort Profile: Estonian Biobank of the Estonian Genome Center, University of Tartu) |

|                |                                                               |        |                          |            |                        |                                |        |                                                                                                                                                                                                                                                                                                                                                                                                                                                                                                                                                                                                           |                                                                                                                                                                                                                                                                                                                                                                                                                                         |
|----------------|---------------------------------------------------------------|--------|--------------------------|------------|------------------------|--------------------------------|--------|-----------------------------------------------------------------------------------------------------------------------------------------------------------------------------------------------------------------------------------------------------------------------------------------------------------------------------------------------------------------------------------------------------------------------------------------------------------------------------------------------------------------------------------------------------------------------------------------------------------|-----------------------------------------------------------------------------------------------------------------------------------------------------------------------------------------------------------------------------------------------------------------------------------------------------------------------------------------------------------------------------------------------------------------------------------------|
|                |                                                               |        |                          |            |                        |                                |        | recruited randomly by general practitioners (GP) and physicians in hospitals.                                                                                                                                                                                                                                                                                                                                                                                                                                                                                                                             |                                                                                                                                                                                                                                                                                                                                                                                                                                         |
| <b>EPICNOR</b> | European Prospective Investigation into Cancer, Norfolk study | Cohort | United Kingdom           | Norfolk    | North-Western European | Population based               | 20,663 | A random sample of 3,036 men and women among the 20,663 participant EPIC Norfolk prospective study (all samples with DNA available and through QCs) were included with DXA measurements on BMD.                                                                                                                                                                                                                                                                                                                                                                                                           | [PMID: 12753873] (Kaptoge, 2003 Effects of gender, anthropometric variables, and aging on the evolution of hip strength in men and women aged over 65); [PMID: 10466767] (Day, 1999 EPIC Norfolk: study design and characteristics of the cohort. European Prospective Investigation of Cancer); [PMID: 19079261] (Waller, 2009 Six new loci associated with body mass index highlight a neuronal influence on body weight regulation); |
| <b>ERF</b>     | Erasmus Rucphen Family                                        | Cohort | The Netherlands          | Rucphen    | North-Western European | Family based isolate           | 1602   | A family based cohort study that is embedded in the Genetic Research in Isolated Populations (GRIP) program in the South West of the Netherlands. The aim of this program was to identify genetic risk factors in the development of complex disorders. For the ERF study, 22 families that had at least five children baptized in the community church between 1850-1900 were identified with the help of genealogical records. All living descendants of these couples and their spouses were invited to take part in the study. Data collection started in June 2002 and was finished in February 2005 | [PMID: 15054401] (Aulchenko, 2004 Linkage disequilibrium in young genetically isolated Dutch population)                                                                                                                                                                                                                                                                                                                                |
| <b>FHS</b>     | Framingham Heart Study                                        | Cohort | United States of America | Framingham | European American      | Population based, family based | 3886   | The Framingham Osteoporosis Study is an ancillary study of the parent, Framingham Study. The Framingham Study is a family based, multigenerational cohort study initiated originally to study the risk factors for cardiovascular disease                                                                                                                                                                                                                                                                                                                                                                 | [PMID: 14819398] (Dawber, 1951 Epidemiological approaches to heart disease: the Framingham Study); [PMID: 474565] (Kannel, 1979 An investigation of coronary heart disease in families. The Framingham offspring study) [PMID: 17372189] (Splansky, 2007 The Third Generation                                                                                                                                                           |

Cohort of the National Heart, Lung, and Blood Institute's Framingham Heart Study: design, recruitment, and initial examination)

|             |                                                        |              |                          |                             |                      |                                |      |                                                                                                                                                                                                                                             |                                                                                                                                                                                                                                                                                                                                                                                                                                                                                                                                                                                                         |
|-------------|--------------------------------------------------------|--------------|--------------------------|-----------------------------|----------------------|--------------------------------|------|---------------------------------------------------------------------------------------------------------------------------------------------------------------------------------------------------------------------------------------------|---------------------------------------------------------------------------------------------------------------------------------------------------------------------------------------------------------------------------------------------------------------------------------------------------------------------------------------------------------------------------------------------------------------------------------------------------------------------------------------------------------------------------------------------------------------------------------------------------------|
| <b>GOOD</b> | Gothenburg Osteoporosis and Obesity Determinants Study | Cohort       | Sweden                   | Gothenburg                  | Northern European    | Population based               | 938  | A study initiated to determine both environmental and genetic factors involved in the regulation of bone and fat mass.                                                                                                                      | [PMID: 16007330] (2005, Free testosterone is a positive whereas free estradiol is a negative predictor of cortical bone size in young Swedish men The GOOD Study)                                                                                                                                                                                                                                                                                                                                                                                                                                       |
| <b>HABC</b> | Health Aging and Body Composition                      | Cohort       | United States of America | Pittsburgh, PA; Memphis, TN | European American    | Population based               | 1649 | A population based, prospective cohort study of well-functioning, unrelated men and women aged 70 and older. It was initiated to assess changes in body composition.                                                                        | [PMID: 12028178] (Visser, 2002 Leg muscle mass and composition in relation to lower extremity performance in men and women aged 70 to 79: the health, aging and body composition study); [PMID: 16043679] (Strotmeyer, 2005 Nontraumatic fracture risk with diabetes mellitus and impaired fasting glucose in older white and black adults: the health, aging, and body composition study); [PMID: 15176990] (Strotmeyer, 2004 Diabetes is associated independently of body composition with BMD and bone volume in older white and black men and women: The Health, Aging, and Body Composition Study) |
| <b>HKOS</b> | Case control                                           | Case/control | China                    | Hong Kong                   | Southern Han Chinese | Population based, clinic based | 800  | A sample of 800 unrelated subjects with extreme BMD phenotype (Z score $\leq -1.28$ or $\geq +1.0$ at either lumbar spine or femoral neck) were selected from a growing database of Hong Kong Southern Chinese (more than 7,000 volunteers) | [PMID:20096396] (Kung, 2010 Association of JAG1 with bone mineral density and osteoporotic fractures: a genome wide association study and follow up replication studies);                                                                                                                                                                                                                                                                                                                                                                                                                               |

|                |                                                             |                                     |                                          |                                                                                                                         |                        |                  |      |                                                                                                                                                                                                                                                                                                                                                                                                                                                                                                                                                                                                                                                                                                                                                                                                                                                                                                                                                                                                                                                                                                                                                                                                                                           |                                                                                                                                                                                                                                                                         |
|----------------|-------------------------------------------------------------|-------------------------------------|------------------------------------------|-------------------------------------------------------------------------------------------------------------------------|------------------------|------------------|------|-------------------------------------------------------------------------------------------------------------------------------------------------------------------------------------------------------------------------------------------------------------------------------------------------------------------------------------------------------------------------------------------------------------------------------------------------------------------------------------------------------------------------------------------------------------------------------------------------------------------------------------------------------------------------------------------------------------------------------------------------------------------------------------------------------------------------------------------------------------------------------------------------------------------------------------------------------------------------------------------------------------------------------------------------------------------------------------------------------------------------------------------------------------------------------------------------------------------------------------------|-------------------------------------------------------------------------------------------------------------------------------------------------------------------------------------------------------------------------------------------------------------------------|
| <b>MROS</b>    | MrOS                                                        | Cohort                              | United States of America                 | Birmingham, AL; Minneapolis, MN; Palo Alto, CA; Monongahela Valley near Pittsburgh, PA; Portland, OR; and San Diego, CA | European American      | Clinic based     | 4473 | The Osteoporotic Fractures in Men Study (MrOS) is a multi-center prospective, longitudinal, observational study of risk factors for vertebral and all non-vertebral fractures in older men, and of the sequelae of fractures in men. The MrOS study population consists of community dwelling, ambulatory men aged 65 years or older from six communities in the United States. Inclusion criteria were designed to provide a study cohort that is representative of the broad population of older men. The inclusion criteria were: (1) ability to walk without the assistance of another, (2) absence of bilateral hip replacements, (3) ability to provide self-reported data, (4) residence near a clinical site for the duration of the study, (5) absence of a medical condition that (in the judgment of the investigator) would result in imminent death, (6) ability to understand and sign an informed consent, and (7) 65 years or older. To qualify as an enrollee, the participant had to provide written informed consent, complete the self-administered questionnaire (SAQ), attend the clinic visit, and complete at least the anthropometric, DEXA, and vertebral X-ray procedures. The MrOS cohort recruited only men. | [PMID: 16598372] (Mellström, 2006 Free testosterone is an independent predictor of BMD and prevalent fractures in elderly men: MrOS Sweden)                                                                                                                             |
| <b>PROSPER</b> | The PROspective Study of Pravastatin in the Elderly at Risk | Cohort, randomized controlled trial | The Netherlands/ United Kingdom /Ireland | Leiden/ Glasgow/ Cork                                                                                                   | North-Western European | Clinic based     | 5242 | A randomized controlled clinical trial to test the effect of pravastatin on cardiovascular outcomes in the elderly at risk.                                                                                                                                                                                                                                                                                                                                                                                                                                                                                                                                                                                                                                                                                                                                                                                                                                                                                                                                                                                                                                                                                                               | [PMID: 12457784] (Shepherd, 2002 Pravastatin in elderly individuals at risk of vascular disease (PROSPER): a randomised controlled trial)                                                                                                                               |
| <b>RS I</b>    | Rotterdam Study I                                           | Cohort                              | The Netherlands                          | Rotterdam                                                                                                               | North-Western European | Population based | 5746 | A prospective population based cohort study of chronic disabling conditions in Dutch elderly individuals aged 55 years and over. The RS III cohort included individuals aged 45 years and over.                                                                                                                                                                                                                                                                                                                                                                                                                                                                                                                                                                                                                                                                                                                                                                                                                                                                                                                                                                                                                                           | [PMID:19700477] (Estrada, 2009 GRIMP: a web and grid based tool for high speed analysis of large scale genome wide association using imputed data); [PMID:19728115] (Hofman, 2009 The Rotterdam Study: 2010 objectives and design update); [PMID:1833235] (Hofman, 1991 |

Determinants of disease and disability in the elderly: the Rotterdam Elderly Study);

|               |                     |        |                 |           |                        |                  |      |                                                                                                                                                                                                 |                                                                                                                                                                                                                                                                                                                                                              |
|---------------|---------------------|--------|-----------------|-----------|------------------------|------------------|------|-------------------------------------------------------------------------------------------------------------------------------------------------------------------------------------------------|--------------------------------------------------------------------------------------------------------------------------------------------------------------------------------------------------------------------------------------------------------------------------------------------------------------------------------------------------------------|
| <b>RS II</b>  | Rotterdam Study II  | Cohort | The Netherlands | Rotterdam | North-Western European | Population based | 2157 | A prospective population based cohort study of chronic disabling conditions in Dutch elderly individuals aged 55 years and over. The RS III cohort included individuals aged 45 years and over. | [PMID:19700477] (Estrada, 2009 GRIMP: a web and grid based tool for high speed analysis of large scale genome wide association using imputed data); [PMID:19728115] (Hofman, 2009 The Rotterdam Study: 2010 objectives and design update); [PMID:1833235] (Hofman, 1991 Determinants of disease and disability in the elderly: the Rotterdam Elderly Study); |
| <b>RS III</b> | Rotterdam Study III | Cohort | The Netherlands | Rotterdam | North-Western European | Population based | 1212 | A prospective population based cohort study of chronic disabling conditions in Dutch elderly individuals aged 55 years and over. The RS III cohort included individuals aged 45 years and over. | [PMID:19700477] (Estrada, 2009 GRIMP: a web and grid based tool for high speed analysis of large scale genome wide association using imputed data); [PMID:19728115] (Hofman, 2009 The Rotterdam Study: 2010 objectives and design update); [PMID:1833235] (Hofman, 1991 Determinants of disease and disability in the elderly: the Rotterdam Elderly Study); |

|               |                                 |        |                          |                                                                                                         |                                                         |                                |         |                                                                                                                                                                                                                                                                                                                                                                                                                                                                                                                                                                                                                                                                                                                                                                                                                                                                                                                                                                                                                                                                                            |                                                                                                                                                                                                                                                                                   |
|---------------|---------------------------------|--------|--------------------------|---------------------------------------------------------------------------------------------------------|---------------------------------------------------------|--------------------------------|---------|--------------------------------------------------------------------------------------------------------------------------------------------------------------------------------------------------------------------------------------------------------------------------------------------------------------------------------------------------------------------------------------------------------------------------------------------------------------------------------------------------------------------------------------------------------------------------------------------------------------------------------------------------------------------------------------------------------------------------------------------------------------------------------------------------------------------------------------------------------------------------------------------------------------------------------------------------------------------------------------------------------------------------------------------------------------------------------------------|-----------------------------------------------------------------------------------------------------------------------------------------------------------------------------------------------------------------------------------------------------------------------------------|
| <b>SOF</b>    | Study of Osteoporotic Fractures | Cohort | United States of America | Baltimore, Maryland; Minneapolis, Minnesota; Portland, Oregon; and the Monongahela Valley, Pennsylvania | European American                                       | Clinic based                   | 3309    | The Study of Osteoporotic Fractures (SOF) is a prospective multicentre study of risk factors for vertebral and non-vertebral fractures. The cohort is comprised of community dwelling women 65 years old or older recruited from populations-based listings in four U.S. areas. The SOF participants were followed up every four months by postcard or telephone to ascertain the occurrence of falls, fractures and changes in address. To date, follow-up rates have exceeded 95% for vital status and fractures. All fractures are validated by x-ray reports or, in the case of most hip fractures, a review of pre-operative radiographs. The inclusion criteria were: 1) 65 years or older, (2) ability to walk without the assistance of another, (3) absence of bilateral hip replacements, (4) ability to provide self-reported data, (5) residence near a clinical site for the duration of the study, (6) absence of a medical condition that (in the judgment of the investigator) would result in imminent death, and (7) ability to understand and sign an informed consent. | [PMID: 7862179] (Cummings, 1995 Risk factors for hip fracture in white women. Study of Osteoporotic Fractures Research Group)                                                                                                                                                     |
| <b>TUK123</b> | TwinsUK                         | Cohort | United Kingdom           | London                                                                                                  | North-Western European                                  | Population based, family based | 4312    | TwinsUK is a population based registry of British Twins representative of the general British population.                                                                                                                                                                                                                                                                                                                                                                                                                                                                                                                                                                                                                                                                                                                                                                                                                                                                                                                                                                                  | [PMID: 19841454] (Richards, 2009 Collaborative meta-analysis: associations of 150 candidate genes with osteoporosis and osteoporotic fracture); [PMID: 18455228] (Richards, 2008 Bone mineral density, osteoporosis, and osteoporotic fractures: a genome wide association study) |
| <b>UKBB</b>   | UK Biobank                      | Cohort | United Kingdom           | National                                                                                                | Mixed (North-Western European subset used for analysis) | Cohort                         | 498,933 | In 2006-2010, the UK Biobank recruited 502,643 individuals aged between 37-73 years (99.5% were 40-69 years) from across the country. Each participant provided a large amount of information regarding their health and lifestyle using touch screen questionnaires, physical measurements and agreement to have their health                                                                                                                                                                                                                                                                                                                                                                                                                                                                                                                                                                                                                                                                                                                                                             | Biobank UK. UK Biobank: Protocol for a Large-scale Prospective Epidemiological Resource. 2010. <a href="http://www.ukbiobank.ac.uk/wp-content/uploads/2011/11/UKBiobank-Protocol.pdf">http://www.ukbiobank.ac.uk/wp-content/uploads/2011/11/UKBiobank-Protocol.pdf</a>            |

|       |                                               |                     |                          |                    |                   |                  |       |                                                                                                                                                                                                                                                                                                                                                                                                                                                                                                                                                                                                                                                                                                                                             |                                                                                                                                                                                                                                        |
|-------|-----------------------------------------------|---------------------|--------------------------|--------------------|-------------------|------------------|-------|---------------------------------------------------------------------------------------------------------------------------------------------------------------------------------------------------------------------------------------------------------------------------------------------------------------------------------------------------------------------------------------------------------------------------------------------------------------------------------------------------------------------------------------------------------------------------------------------------------------------------------------------------------------------------------------------------------------------------------------------|----------------------------------------------------------------------------------------------------------------------------------------------------------------------------------------------------------------------------------------|
|       |                                               |                     |                          |                    |                   |                  |       | followed and they also provided blood, urine and saliva samples for future analysis. A subset of 152,248 individuals currently have genetic data available from the May 2015 release.                                                                                                                                                                                                                                                                                                                                                                                                                                                                                                                                                       |                                                                                                                                                                                                                                        |
| WGHS  | Women's Genome Health Study                   | Cohort              | United States of America | National           | European American | Population based | 22330 | A population based cohort derived from the approximately 72% of women who provided a blood sample in the Women's Health Study, a trial of aspirin and vitamin E in prevention of cardiovascular disease and cancer among middle aged, female health care professionals. The WGHS now has over 20 years of follow up for incident clinical events, including bone fracture                                                                                                                                                                                                                                                                                                                                                                   | [PMID: 18070814] (Ridker, 2008 Women's Genome Health Study Working Group. Rationale, design, and methodology of the Women's Genome Health Study: a genome wide association study of more than 25,000 initially healthy american women) |
| WHICT | Women's Health Initiative Clinical Trial      | Quasi case /control | United States of America | Multi center (n=3) | European American | Population based | 3923  | Hip fracture portion of GeCHIP. This is a case control sample from the Women's Health Initiative. All hip fractures in the WHI Clinical Trial (CT) and Observational Study (OS) through Aug2007 were selected and matched to controls. In the OS, controls were matched on age (+/- 1yr), race/ethnicity (exact), enrolment date (+/- 365 days) and current HT use at baseline (exact). For the CT age (+/- 1yr), race/ethnicity (exact), earliest randomization date (+/- 365 days), HT use (active vs. placebo, or if not enrolled current HT use at baseline; exact) and CaD use (active vs. placebo vs. not enrolled; exact). Controls were excluded if they self-reported a prior history of postmenopausal fracture (age >= 55 years) | [PMID: 9492970] (1998, Design of the Women's Health Initiative clinical trial and observational study. The Women's Health Initiative Study Group)                                                                                      |
| WHIOS | Women's Health Initiative Observational Study | Quasi case /control | United States of America | Multi center (n=3) | European American | Population based | 3923  | Hip fracture portion of GeCHIP. This is a case control sample from the Women's Health Initiative. All hip fractures in the WHI Clinical Trial (CT) and Observational Study (OS) through Aug2007 were selected and matched to controls. In the OS, controls were matched on age (+/- 1yr), race/ethnicity (exact), enrolment date (+/- 365 days) and current HT use at baseline (exact). For the CT age (+/- 1yr), race/ethnicity (exact), earliest randomization date (+/- 365 days), HT                                                                                                                                                                                                                                                    | [PMID: 9492970] (1998, Design of the Women's Health Initiative clinical trial and observational study. The Women's Health Initiative Study Group)                                                                                      |

use (active vs. placebo, or if not enrolled current HT use at baseline; exact) and CaD use (active vs. placebo vs. not enrolled; exact). Controls were excluded if they self-reported a prior history of postmenopausal fracture (age >= 55 years)

---

|            |                              |        |         |             |                   |                  |      |                                                                                                                                                                                                                                                                                                                                           |                                                                                                    |
|------------|------------------------------|--------|---------|-------------|-------------------|------------------|------|-------------------------------------------------------------------------------------------------------------------------------------------------------------------------------------------------------------------------------------------------------------------------------------------------------------------------------------------|----------------------------------------------------------------------------------------------------|
| <b>YFS</b> | CV risk in Young Finns Study | Cohort | Finland | Multicenter | Northern European | Population based | 1586 | The Cardiovascular Risk in Young Finns Study is one of the largest follow-up studies into cardiovascular risk from childhood to adulthood. The main aim of the Young Finns Study is to determine the contribution made by childhood lifestyle, biological and psychological measures to the risk of cardiovascular diseases in adulthood. | [PMID: 18263651]<br>(Raitakari, 2008 Cohort profile: the cardiovascular risk in Young Finns Study) |
|------------|------------------------------|--------|---------|-------------|-------------------|------------------|------|-------------------------------------------------------------------------------------------------------------------------------------------------------------------------------------------------------------------------------------------------------------------------------------------------------------------------------------------|----------------------------------------------------------------------------------------------------|



**Table S1B | Descriptive Study Design Characteristics for Replication Cohorts**

| Short name            | Type             | Study Name                                                                       | Study Design                                           | Country of Origin        | City of Origin | Ethnicity              | Study Type                       | Total Sample Size with DNA and Phenotype Information (N) | Short Study Description                                                                                                                                                                                                                                                                                                                                            | References                                                                                                                                                                                                                                                                                                                                                                                                                                                                                                                                                                                                                                                                                                                                                                                                                                                                                                                                         |
|-----------------------|------------------|----------------------------------------------------------------------------------|--------------------------------------------------------|--------------------------|----------------|------------------------|----------------------------------|----------------------------------------------------------|--------------------------------------------------------------------------------------------------------------------------------------------------------------------------------------------------------------------------------------------------------------------------------------------------------------------------------------------------------------------|----------------------------------------------------------------------------------------------------------------------------------------------------------------------------------------------------------------------------------------------------------------------------------------------------------------------------------------------------------------------------------------------------------------------------------------------------------------------------------------------------------------------------------------------------------------------------------------------------------------------------------------------------------------------------------------------------------------------------------------------------------------------------------------------------------------------------------------------------------------------------------------------------------------------------------------------------|
| <b>23andMe</b>        | <i>in silico</i> | 23andMe, Inc.                                                                    | Cohort                                                 | United States of America | Mountain View  | European               | Population based                 | 297,285                                                  | All participants were drawn from the customer base of 23andMe, Inc., a consumer genetics company. This cohort has been described in detail previously (Refs). Participants provided informed consent and participated in the research online, under a protocol approved by the external AAHRPP-accredited IRB, Ethical & Independent Review Services (E&I Review). | Tung JY, Do CB, Hinds DA, Kiefer AK, Macpherson JM, Chowdry AB, Francke U, Naughton BT, Mountain JL, Wojcicki A, Eriksson N. "Efficient replication of over 180 genetic associations with self-reported medical data." PLoS One. 2011;6(8):e23473.; Eriksson N, Macpherson JM, Tung JY, Hon LS, Naughton B, Saxonov S, Avey L, Wojcicki A, Pe'er I, Mountain J. "Web-based, participant-driven studies yield novel genetic associations for common traits." PLoS Genet. 2010 Jun 24;6(6):e1000993. [PMID: 19707703] (Henry, 2010 Bone mineral density reference ranges for Australian men: Geelong Osteoporosis Study); [PMID: 11090233] (Henry, 2000 Prevalence of osteoporosis in Australian women: Geelong Osteoporosis Study) [PMID: 17042717] (McCloskey, 2007 Clodronate reduces the incidence of fractures in community-dwelling elderly women unselected for osteoporosis: results of a double-blind, placebo-controlled randomized study) |
| <b>AOGC-GOS</b>       | <i>de-novo</i>   | Anglo-Australasian Osteoporosis Genetics Consortium - Geelong Osteoporosis Study | Population cohort, and case/control for fracture cases | Australia                | Geelong        | North-Western European | Population based, clinical-based | 2922                                                     | Population-based BMD cohort (from electoral rolls) and case-control for fracture cases; all drawn from Geelong general population of men and women                                                                                                                                                                                                                 | [PMID: 19707703] (Henry, 2010 Bone mineral density reference ranges for Australian men: Geelong Osteoporosis Study); [PMID: 11090233] (Henry, 2000 Prevalence of osteoporosis in Australian women: Geelong Osteoporosis Study) [PMID: 17042717] (McCloskey, 2007 Clodronate reduces the incidence of fractures in community-dwelling elderly women unselected for osteoporosis: results of a double-blind, placebo-controlled randomized study)                                                                                                                                                                                                                                                                                                                                                                                                                                                                                                    |
| <b>AOGC-SHEFFIELD</b> | <i>de-novo</i>   | Anglo-Australasian Osteoporosis Genetics Consortium - Sheffield                  | Cohort                                                 | United Kingdom           | Sheffield      | North-Western European | Population based                 | 4014                                                     | Large population-based cohort of community-dwelling elderly women aged $\geq 75$ years                                                                                                                                                                                                                                                                             | [PMID: 17042717] (McCloskey, 2007 Clodronate reduces the incidence of fractures in community-dwelling elderly women unselected for osteoporosis: results of a double-blind, placebo-controlled randomized study)                                                                                                                                                                                                                                                                                                                                                                                                                                                                                                                                                                                                                                                                                                                                   |

|                   |                |                                                   |              |                |           |                        |                       |      |                                                                                                                                                                                                                                                                                                                         |                                                                                                                                                                                                                                                                                                                                                |
|-------------------|----------------|---------------------------------------------------|--------------|----------------|-----------|------------------------|-----------------------|------|-------------------------------------------------------------------------------------------------------------------------------------------------------------------------------------------------------------------------------------------------------------------------------------------------------------------------|------------------------------------------------------------------------------------------------------------------------------------------------------------------------------------------------------------------------------------------------------------------------------------------------------------------------------------------------|
| <b>APOSS</b>      | <i>de-novo</i> | Aberdeen Prospective Osteoporosis Screening Study | Cohort       | United Kingdom | Aberdeen  | North-Western European | Population based      | 3268 | APOSS is a longitudinal population-based study of osteoporotic fracture risk assessment in Caucasian women aged 45-54 years of age at baseline.                                                                                                                                                                         | [PMID: 16355284] (Macdonald, 2006 Large-scale population-based study shows no evidence of association between common polymorphism of the VDR gene and BMD in British women)                                                                                                                                                                    |
| <b>AROS</b>       | <i>de-novo</i> | Aarhus Osteoporosis Study                         | Case control | Denmark        | Aarhus    | Northern European      | Clinic based          | 801  | Men and women with and without osteoporosis                                                                                                                                                                                                                                                                             | [PMID: 16299058] (Gugatschka, 2002 Molecularly defined lactose malabsorption, milk consumption and anthropometric differences in adult males); [PMID: 14753735] (Obermayer Pietsch, 2004 Genetic predisposition for adult lactose intolerance and relation to diet, bone density, and bone fractures)                                          |
| <b>AUSTRIOS-A</b> | <i>de-novo</i> | Austrios A "Young cohort"                         | Cohort       | Austria        | Graz      | Central European       | General population    | 893  | Men and women with and without osteoporosis                                                                                                                                                                                                                                                                             | [PMID: 18349089] (van Meurs, 2008 Large-scale analysis of association between LRP5 and LRP6 variants and osteoporosis)                                                                                                                                                                                                                         |
| <b>AUSTRIOS-B</b> | <i>de-novo</i> | Austrios B "old cohort"                           | Cohort       | Austria        | Graz      | Central European       | Nursing home patients | 1158 | 95 nursing homes in Austria, patients had to be relatively healthy                                                                                                                                                                                                                                                      | [PMID: 18349089] (van Meurs, 2008 Large-scale analysis of association between LRP5 and LRP6 variants and osteoporosis)                                                                                                                                                                                                                         |
| <b>BARCOS</b>     | <i>de-novo</i> | Barcelona Cohorte Osteoporosis                    | Cohort       | Spain          | Barcelona | Mediterranean European | General population    | 1400 | The Barcelona is a cohort study of unrelated women aged 44 years and over that were recruited from the Menopausal Unit of the Hospital del Mar, Barcelona. All of the participants were consecutive, unselected, postmenopausal women who had presented to the outpatient clinic for a baseline visit due to menopause. | [PMID: 17878995] (Bustamante, 2007 Promoter 2 -1025 T/C polymorphism in the RUNX2 gene is associated with femoral neck bmd in Spanish postmenopausal women); [PMID: 17984249] (Bustamante, 2007 Polymorphisms in the interleukin-6 receptor gene are associated with bone mineral density and body mass index in Spanish postmenopausal women) |

|                      |                |                                                                            |                                     |           |                                |                        |                              |      |                                                                                                                                                                                         |                                                                                                                                                                                                                                                                                                                                                                                                                                                                                     |
|----------------------|----------------|----------------------------------------------------------------------------|-------------------------------------|-----------|--------------------------------|------------------------|------------------------------|------|-----------------------------------------------------------------------------------------------------------------------------------------------------------------------------------------|-------------------------------------------------------------------------------------------------------------------------------------------------------------------------------------------------------------------------------------------------------------------------------------------------------------------------------------------------------------------------------------------------------------------------------------------------------------------------------------|
| <b>CABRIO-C</b>      | <i>de-novo</i> | Cantabria-Camargo                                                          | Cross-sectional                     | Spain     | Santander                      | Mediterranean European | Community based              | 1450 | Community-based study designed to evaluate the prevalence of metabolic bone diseases in postmenopausal women and men older than 50 attended at a primary care center in Northern Spain. | [PMID: 20594548] (Olmos, 2010 Bone turnover markers in Spanish adult men The Camargo Cohort Study); [PMID: 19737549] (Martínez, 2009 Bone turnover markers in Spanish postmenopausal women: the Camargo cohort study)                                                                                                                                                                                                                                                               |
| <b>CABRIO-CC</b>     | <i>de-novo</i> | Cantabria Osteoporosis Case-control                                        | Case-control, cross-sectional       | Spain     | Santander                      | Mediterranean European | Clinic based plus volunteers | 2321 | Clinic-based study of control individuals and patients with osteoporosis living in Cantabria, a region in Northern Spain                                                                | [PMID: 17118999] (Riancho, 2007 Identification of an aromatase haplotype that is associated with gene expression and postmenopausal osteoporosis); [PMID: 17218734] (Zarrabeitia, 2007 Adiposity, estradiol, and genetic variants of steroid-metabolizing enzymes as determinants of bone mineral density)                                                                                                                                                                          |
| <b>LSAW (CAIFOS)</b> | <i>de-novo</i> | Longitudinal Study of Aging in Women Calcium Intake Fracture Outcome Study | Cohort, randomized controlled trial | Australia | Perth                          | North-Western European | Population based             | 1347 | Randomized controlled trial and cohort study                                                                                                                                            | [PMID: 16636212] (Prince, 2006 Effects of calcium supplementation on clinical fracture and bone structure: results of a 5 year, double blind, placebo controlled trial in elderly women)                                                                                                                                                                                                                                                                                            |
| <b>CALEX</b>         | <i>de-novo</i> | Calex-family study                                                         | Cohort                              | Finland   | Jyväskylä and its surroundings | Northern European      | General population           | 994  | The Calex-family study is a family-based study to study Fractures in Puberty - Causes and Implications in Old Age                                                                       | [PMID: 19171028] (Cheng, 2009 Trait-specific tracking and determinants of body composition: a 7-year follow-up study of pubertal growth in girls); [PMID: 19481189] (Cheng, 2009 Low volumetric BMD is linked to upper-limb fracture in pubertal girls andpersists into adulthood: a seven-year cohort study); [PMID: 20200961] (Wang, 2010 Familial resemblance and diversity in bone mass and strength in the population are established during the first year of postnatal life) |

|              |                |                                             |                 |           |                                                                                             |                        |                                         |      |                                                                                                                                                                                                                                                                                                                                             |                                                                                                                                                                                                                                                                                                                                                                                                                                                                                                                                                                                                            |
|--------------|----------------|---------------------------------------------|-----------------|-----------|---------------------------------------------------------------------------------------------|------------------------|-----------------------------------------|------|---------------------------------------------------------------------------------------------------------------------------------------------------------------------------------------------------------------------------------------------------------------------------------------------------------------------------------------------|------------------------------------------------------------------------------------------------------------------------------------------------------------------------------------------------------------------------------------------------------------------------------------------------------------------------------------------------------------------------------------------------------------------------------------------------------------------------------------------------------------------------------------------------------------------------------------------------------------|
| <b>CAMOS</b> | <i>de-novo</i> | Canadian Multicentre Osteoporosis Study     | Cohort          | Canada    | Vancouver, Calgary, Saskatoon, Hamilton, Toronto, Kingston, Québec City, Halifax, St John's | European Canadian      | General population                      | 2388 | The CaMos Study is a population-based, randomly selected, prospective cohort study from 9 Canadian cities followed for 14 years for osteoporosis-related traits and outcomes.                                                                                                                                                               | [PMID: 11199195] (Tenenhouse, 2000 Estimation of the prevalence of low bone density in Canadian women and men using a population-specific DXA reference standard: the Canadian Multicentre Osteoporosis Study (CaMos)); [PMID: 17129177] (Richards, 2007 Changes to osteoporosis prevalence according to method of risk assessment);(Berger C 2008 Change in bone mineral density as a function of age in women and men and association with the use of antiresorptive agents [PMID: 17242321] (Richards, 2007 Effect of selective serotonin reuptake inhibitors on the risk of fracture) [PMID: 18559803] |
| <b>DOES</b>  | <i>de-novo</i> | Dubbo Osteoporosis Epidemiology Study       | Cohort          | Australia | Sydney (Dubbo)                                                                              | North-Western European | Population based, family based          | 1457 | A cohort study of approximately 2/3rds of the men and women in Dubbo, aged 60 years or older from 1989 every 2 years to the present. Data collected include BMD, life style, medical assessment, medication use and a wide range of health conditions and outcomes. It has been extended recently to include any person older than 20 years | [PMID: 19190316] (Bliuc, 2009 Mortality risk associated with low-trauma osteoporotic fracture and subsequent fracture in men and women); [PMID: 19419321] (Frost, 2009 Timing of repeat BMD measurements: development of an absolute risk-based prognostic model)                                                                                                                                                                                                                                                                                                                                          |
| <b>DOPS</b>  | <i>de-novo</i> | Danish Osteoporosis Prevention Study Cohort | Cohort          | Denmark   | Aarhus, Odense, Cope                                                                        | Northern European      | Population based                        | 1716 | Population based study of perimenopausal women. The women were followed for 10 years. App. 35% were treated with HRT                                                                                                                                                                                                                        | [PMID: 10340280] (Mosekilde, 1999 The Danish Osteoporosis Prevention Study (DOPS): project design and inclusion of 2000 normal perimenopausal women)                                                                                                                                                                                                                                                                                                                                                                                                                                                       |
| <b>EDOS</b>  | <i>de-novo</i> | Edinburgh Osteoporosis Study                | Cross-sectional | UK        | Edinburgh and Lothian                                                                       | North-Western European | Clinical referral population (patients) | 2024 | Clinical referral population of patients assessed for evaluation of osteoporosis                                                                                                                                                                                                                                                            | None                                                                                                                                                                                                                                                                                                                                                                                                                                                                                                                                                                                                       |

|                |                |                                                                                                               |                 |        |                                                  |                        |                    |      |                                                                                                                                                                                                                                                                                                                                                                                                                                                                                                                                                               |                                                                                                                                                                                                                                                                                                                                                                                                                                                                                                                                                                   |
|----------------|----------------|---------------------------------------------------------------------------------------------------------------|-----------------|--------|--------------------------------------------------|------------------------|--------------------|------|---------------------------------------------------------------------------------------------------------------------------------------------------------------------------------------------------------------------------------------------------------------------------------------------------------------------------------------------------------------------------------------------------------------------------------------------------------------------------------------------------------------------------------------------------------------|-------------------------------------------------------------------------------------------------------------------------------------------------------------------------------------------------------------------------------------------------------------------------------------------------------------------------------------------------------------------------------------------------------------------------------------------------------------------------------------------------------------------------------------------------------------------|
| <b>EPICNOR</b> | <i>de-novo</i> | European Prospective Investigation of Cancer (Norfolk, UK cohort)                                             | Cohort          | UK     | Norfolk                                          | North-Western European | General population | 3977 | EPIC-Norfolk was conceived as part of a large Europe-wide study into the dietary and lifestyle determinants of cancer and had recruited 25,311 men and women aged 45-74 years. It was later broadened to include collaborative studies into other disease end-points including cardiovascular disease, diabetes, and bone fragility. The bone fragility study was initiated some 18 months after the inception of EPIC-Norfolk and recruited a random sample of 1511 men and women in the top decade of age (i.e. aged 65-74 at recruitment to EPIC-Norfolk). | [PMID: 12753873] (Kaptoge, 2003 Effects of gender, anthropometric variables, and aging on the evolution of hip strength in men and women aged over 65); [PMID: 10466767] (Day, 1999 EPIC-Norfolk: study design and characteristics of the cohort. European Prospective Investigation of Cancer); [PMID: 19079261] (Willer, 2009 Six new loci associated with body mass index highlight a neuronal influence on body weight regulation)                                                                                                                            |
| <b>EPOLOS</b>  | <i>de-novo</i> | Early risk identification and effective prevention of osteoporosis based bone fractures in Polish population. | Cross-sectional | Poland | Warsaw, Lodz, Poznan, Krakow, Wroclaw, Bydgoszcz | Central European       | Population based   | 715  | The EPOLOS Study is a population-based, cross-sectional study of unrelated men and women aged 19-81 years, initiated to identify early risk and effective prevention of osteoporosis based bone fractures in Polish population.                                                                                                                                                                                                                                                                                                                               | [PMID: 20502405] (Skowrońska-Józwiak, 2010 Comparison of selected methods for fracture risk assessment in postmenopausal women: analysis of the Łódź population in the EPOLOS study); [PMID: 20502404] (Skowrońska-Józwiak, 2010 Effect of sex, age, and anthropometric parameters on the size and shape of vertebrae in densitometric morphometry: results of the EPOLOS study); [PMID: 19396748] (Skowrońska-Józwiak, 2009 Identification of vertebral deformities in the Polish population by morphometric X-ray absorptiometry - results of the EPOLOS study) |

|              |                |                                                                  |              |                                          |          |                   |                              |      |                                                                                                                                                                                                                                                                                                                                                                                                                                                                                                                                   |                                                                                                                                                                                                                                                                                                                                                                                                                                                                                                          |
|--------------|----------------|------------------------------------------------------------------|--------------|------------------------------------------|----------|-------------------|------------------------------|------|-----------------------------------------------------------------------------------------------------------------------------------------------------------------------------------------------------------------------------------------------------------------------------------------------------------------------------------------------------------------------------------------------------------------------------------------------------------------------------------------------------------------------------------|----------------------------------------------------------------------------------------------------------------------------------------------------------------------------------------------------------------------------------------------------------------------------------------------------------------------------------------------------------------------------------------------------------------------------------------------------------------------------------------------------------|
| <b>EPOS</b>  | <i>de-novo</i> | European Prospective Osteoporosis Study                          | Cohort       | 18 centres across 13 countries in Europe | Europe   | European          | General population           | 2106 | EPOS was an extension of the European Vertebral Osteoporosis Study (EVOS) study and aimed to quantify incidence of vertebral and non-vertebral fractures. EVOS had recruited some 17,342 men and women aged over 50 years from 36 centres in 19 European countries. Each centre had recruited a random sample of up to 300 men and 300 women from population registers stratified into six 5-year age bands: 50-54, ..., 70-74 and 75+. A total of 7,273 participants from 31 EVOS centres took part in the EPOS follow up study. | [PMID: 8797123] (O'Neill, 1996 The prevalence of vertebral deformity in european men and women: the European Vertebral Osteoporosis Study); [PMID: 10824241] (Ismail, 2000 Validity of self-report of fractures: results from a prospective study in men and women across Europe. EPOS Study Group. European Prospective Osteoporosis Study Group); [PMID: 11918229] (EPOS study group, 2002 Incidence of vertebral fracture in europe: results from the European Prospective Osteoporosis Study (EPOS)) |
| <b>FLOS</b>  | <i>de-novo</i> | FLORENCE study                                                   | Cohort       | Italy                                    | Florence | Southern European | Population based             | 1000 | The FLOS Study is a population based cohort study of unrelated men and women aged 50 years and over, collected to perform genetic studies in osteoporosis.                                                                                                                                                                                                                                                                                                                                                                        | [PMID: 11344237] (Masi, 2001 Polymorphism of the aromatase gene in postmenopausal Italian women: distribution and correlation with bone mass and fracture risk)                                                                                                                                                                                                                                                                                                                                          |
| <b>GEOS</b>  | <i>de-novo</i> | Quebec sample                                                    | Cohort       | Canada                                   | Quebec   | Western European  | General population           | 2379 | Population-based sample collected for the study of bone mineral variation. Only women from 18 to 84 years                                                                                                                                                                                                                                                                                                                                                                                                                         | [PMID: 19821770] (Elfassih, 2010 Association with replication between estrogen-related receptor gamma (ESRRgamma) polymorphisms and bone phenotypes in women of European ancestry)                                                                                                                                                                                                                                                                                                                       |
| <b>GEVUR</b> | <i>de-novo</i> | Institute of Biochemistry and Genetics Ufa Scientific Centre RAS | case-control | Russia                                   | Ufa      | Russians, Tatars  | General population, patients | 999  | The GEVUR Study is case-control and population-based, prospective cohort study of unrelated women aged 50 years and over, men with osteoporotic fractures and healthy men                                                                                                                                                                                                                                                                                                                                                         | [PMID: 15657606] (Laan, 2005 X-chromosome as a marker for population history: linkage disequilibrium and haplotype study in Eurasian populations); [PMID: 16465065] (Kutuev, 2006 From East to West: patterns of genetic diversity of populations living in four Eurasian regions); [PMID: 18619040] (Selezneva, 2008 Association of polymorphisms and                                                                                                                                                   |

haplotypes in the 5' region of COL1A1 gene with the risk of osteoporotic fractures in Russian women from Volga-Ural region)

|                |                |                                                                  |                      |                  |                  |                        |                              |      |                                                                                                                                                                                                                                                                                                                                                     |                                                                                                                                                                                                                                                                                                                                                                                                                                                                                    |
|----------------|----------------|------------------------------------------------------------------|----------------------|------------------|------------------|------------------------|------------------------------|------|-----------------------------------------------------------------------------------------------------------------------------------------------------------------------------------------------------------------------------------------------------------------------------------------------------------------------------------------------------|------------------------------------------------------------------------------------------------------------------------------------------------------------------------------------------------------------------------------------------------------------------------------------------------------------------------------------------------------------------------------------------------------------------------------------------------------------------------------------|
| <b>GEVUR-2</b> | <i>de-novo</i> | Institute of Biochemistry and Genetics Ufa Scientific Centre RAS | case-control         | Russia           | Ufa              | Russians, Tatars       | General population, patients | 999  | The GEVUR Study is case-control and population-based, prospective cohort study of unrelated women aged 50 years and over, men with osteoporotic fractures and healthy men                                                                                                                                                                           | [PMID: 15657606] (Laan, 2005 X-chromosome as a marker for population history: linkage disequilibrium and haplotype study in Eurasian populations); [PMID: 16465065] (Kutuev, 2006 From East to West: patterns of genetic diversity of populations living in four Eurasian regions); [PMID: 18619040] (Selezneva, 2008 Association of polymorphisms and haplotypes in the 5' region of COL1A1 gene with the risk of osteoporotic fractures in Russian women from Volga-Ural region) |
| <b>GROS</b>    | <i>de-novo</i> | Genetic Analysis of Osteoporosis in Greece                       | Cohort, case-control | Greece           | Athens           | Mediterranean European | General population, patients | 491  | The GROS study is a population-based, prospective cohort study of unrelated Greek men and women aged 43 years and over who visited the Department of Orthopaedic Surgery, University Hospital of Thessalia, Larissa, Greece.                                                                                                                        | None                                                                                                                                                                                                                                                                                                                                                                                                                                                                               |
| <b>HCS</b>     | <i>de-novo</i> | Hertfordshire Cohort Study                                       | Cohort               | UK               |                  | North-Western European | General population           | 2973 | The Hertfordshire Cohort Study is a population-based cohort study of men and women born between 1931 and 1939 in the county of Hertfordshire, UK. It was initiated to evaluate interactions between the genome, the intrauterine and early postnatal development, and adult diet and lifestyle in the aetiology of chronic disorders in later life. | [PMID: 15964908] (Syddall, 2005 Cohort Profile: The Hertfordshire Cohort Study)                                                                                                                                                                                                                                                                                                                                                                                                    |
| <b>HKOS</b>    | <i>de-novo</i> | Chinese community elderly Men and Women study                    | Cohort               | Hong Kong, China | Hong Kong, China | Chinese                | General population           | 4000 | Two thousand Chinese men and two thousand Chinese women living in the community, aged 65 years and above, were recruited by posting public advertisements at community centers for the elderly and housing estates in Hong Kong since 2001.                                                                                                         | [PMID: 20949110;] (Styrkarsdottir, 2010 European bone mineral density loci are also associated with BMD in East-Asian populations); [PMID: 19766747] (Tang, 2010 Sex-specific effect of                                                                                                                                                                                                                                                                                            |

|               |                |                                                  |                 |                 |                                         |                        |                    |      |                                                                                                                                                                                                                                                                                                                                                                                                                                                                                                                                                                                                                                                                                                                                                                                                                                                                                                                                                                                   |                                                                                                                                                                                                          |
|---------------|----------------|--------------------------------------------------|-----------------|-----------------|-----------------------------------------|------------------------|--------------------|------|-----------------------------------------------------------------------------------------------------------------------------------------------------------------------------------------------------------------------------------------------------------------------------------------------------------------------------------------------------------------------------------------------------------------------------------------------------------------------------------------------------------------------------------------------------------------------------------------------------------------------------------------------------------------------------------------------------------------------------------------------------------------------------------------------------------------------------------------------------------------------------------------------------------------------------------------------------------------------------------|----------------------------------------------------------------------------------------------------------------------------------------------------------------------------------------------------------|
| <b>KORAMC</b> | <i>de-novo</i> | Korean osteoporosis study at Asan Medical Center | Cross-sectional | Korea           | Seoul                                   | East Asian, Korean     | Clinic based       | 1397 | KorAMC study is a hospital registered, cross sectional study of postmenopausal Korean women                                                                                                                                                                                                                                                                                                                                                                                                                                                                                                                                                                                                                                                                                                                                                                                                                                                                                       | Pirin gene on bone mineral density in a cohort of 4000 Chinese)<br>[PMID: 17620055] (Koh, 2007 Association of FLT3 polymorphisms with low BMD and risk of osteoporotic fracture in postmenopausal women) |
| <b>LASA</b>   | <i>de-novo</i> | Longitudinal Aging Study Amsterdam               | Cohort          | The Netherlands | Amsterdam, Zwolle, Oss and surroundings | North-Western European | General population | 831  | LASA is an ongoing multidisciplinary cohort study on predictors and consequences of changes in physical, cognitive, emotional and social functioning in older persons.                                                                                                                                                                                                                                                                                                                                                                                                                                                                                                                                                                                                                                                                                                                                                                                                            | [PMID: 11927198] (Deeg, 2002 Attrition in the Longitudinal Aging Study Amsterdam: The effect of differential inclusion in side studies)                                                                  |
| <b>MANMC</b>  | <i>de-novo</i> | Manitoba McGill Fracture Study                   | Cross-Sectional | Canada          | Winnipeg                                | North-Western European | General Population | 1062 | The Manitoba-McGill Fracture Study is a population-based sample of women experiencing a validated clinical hip or forearm fracture requiring surgical intervention.                                                                                                                                                                                                                                                                                                                                                                                                                                                                                                                                                                                                                                                                                                                                                                                                               | [PMID: 21124974] (Ladouceur, 2010 An Efficient Paradigm for Genetic Epidemiology Cohort Creation)                                                                                                        |
| <b>MINOS</b>  | <i>de-novo</i> | MINOS                                            | Cohort          | France          | Montceau les Mines                      | Western European       | General Population | 495  | MINOS is a prospective cohort study of male osteoporosis. Its aim was to assess predictors of bone loss and fractures in men. Participants were recruited in 1995 to 1996 from the Société de Secours Minière de Bourgogne (SSMB) rolls in Montceau les Mines. Letters inviting participation were sent to a randomly selected sample of 3400 clients of SSMB aged 50 to 85 years. Among them, 841 agreed to participate and provided informed consent. Forty-three men refused bone densitometry or had radiographs of poor quality. The cohort was followed up for 7.5 years (questionnaire and DXA every 18 months, spine radiograph after 3 and 7.5 years). Then, for 2.5 years, the men were followed up to obtain information on incident nonvertebral fractures. Men were followed to the first of the following: fracture, last contact, death, or end of follow-up. Men were followed to the first of the following: fracture, last contact, death, or end of follow-up. | [PMID: 10678406] (Szulc, 2000 Cross-sectional assessment of age-related bone loss in men)                                                                                                                |



|              |                |                                   |              |        |                               |                   |                    |      |                                                                                                                                                                                                                                                                                                                                                                                                                                                                                                                                                                                                                                                                                                                                                                                                                                       |                                                                                                                                                                                                                                                                                                                                                                                                                                                  |
|--------------|----------------|-----------------------------------|--------------|--------|-------------------------------|-------------------|--------------------|------|---------------------------------------------------------------------------------------------------------------------------------------------------------------------------------------------------------------------------------------------------------------------------------------------------------------------------------------------------------------------------------------------------------------------------------------------------------------------------------------------------------------------------------------------------------------------------------------------------------------------------------------------------------------------------------------------------------------------------------------------------------------------------------------------------------------------------------------|--------------------------------------------------------------------------------------------------------------------------------------------------------------------------------------------------------------------------------------------------------------------------------------------------------------------------------------------------------------------------------------------------------------------------------------------------|
| <b>MOFS</b>  | <i>de-novo</i> | Malta Osteoporotic Fracture Study | Case-Control | Malta  | Msida                         | Southern European | General population | 1046 | For the Malta Osteoporotic Fracture Study eligible postmenopausal women referred by medical practitioners to the Bone Density Unit at the Department of Obstetrics and Gynaecology, Mater Dei Hospital, Malta, were recruited as controls. Fracture cases were recruited from the Bone Density Unit, Orthopaedic department (Mater Dei Hospital), and Karin Grech Rehabilitation Hospital. All research subjects studied were healthy Caucasian women with ages ranging from 40–79 years.                                                                                                                                                                                                                                                                                                                                             | [PMID: 26400554] (Formosa, 2016 Biochemical predictors of low bone mineral density and fracture susceptibility in Maltese postmenopausal women); [PMID: 21994215] (Vidal, 2011 Functional polymorphisms within the TNFRSF11B (osteoprotegerin) gene increase the risk for low bone mineral density) [PMID: 19580891] (Vidal, 2009 Effects of a synonymous variant in exon 9 of the CD44 gene on pre-mRNA splicing in a family with osteoporosis) |
| <b>MROSS</b> | <i>de-novo</i> | MrOS Sweden                       | Cohort       | Sweden | Gothenburg, Uppsala and Malmö | Northern European | Population-based   | 2924 | The Osteoporotic Fractures in Men (MrOS) study is a multicenter, prospective study including 3,014 elderly men in Sweden, Hong Kong (~2,000), and the United States (~6,000). The MrOS Sweden cohort consist of three sub-cohorts from three different Swedish cities (n=1,005 in Malmö, n=1,010 in Göteborg, and n=999 in Uppsala). Study subjects (men aged 69–80 years) were randomly identified using national population registers, contacted and asked to participate. To be eligible for the study, the subjects had to be able to walk without assistance, provide self-reported data, and sign an informed consent; there were no other exclusion criteria. The study was approved by the ethics committees at the Universities of Gothenburg, Lund, and Uppsala. Informed consent was obtained from all study participants. | [PMID: 16598372] (Mellström, 2006 Free testosterone is an independent predictor of BMD and prevalent fractures in elderly men: MrOS Sweden)                                                                                                                                                                                                                                                                                                      |

|              |                |                                                     |                 |                          |                          |                        |                  |      |                                                                                                                                                                                                                                                                                                                                                                                                                                                                                                                                                                                                                                                                                                                                            |                                                                                                                                                                                                                                                                                                                                                                                         |
|--------------|----------------|-----------------------------------------------------|-----------------|--------------------------|--------------------------|------------------------|------------------|------|--------------------------------------------------------------------------------------------------------------------------------------------------------------------------------------------------------------------------------------------------------------------------------------------------------------------------------------------------------------------------------------------------------------------------------------------------------------------------------------------------------------------------------------------------------------------------------------------------------------------------------------------------------------------------------------------------------------------------------------------|-----------------------------------------------------------------------------------------------------------------------------------------------------------------------------------------------------------------------------------------------------------------------------------------------------------------------------------------------------------------------------------------|
| <b>NOSOS</b> | <i>de-novo</i> | North of Scotland Osteoporosis Study                | Cohort          | United Kingdom           | Aberdeen, Dingwall       | North-Western European | Population-based | 1293 | NOSOS is a population-based osteoporosis screening programme of postmenopausal females aged 60-82 years of age at baseline.                                                                                                                                                                                                                                                                                                                                                                                                                                                                                                                                                                                                                | [PMID: 18633668] (Mavroicidi, 2009 Physical activity and dietary calcium interactions in bone mass in Scottish postmenopausal women); [PMID: 20966103] (Judson, 2010 The Functional ACTN3 577X Variant Increases the Risk of Falling in Older Females: Results From Two Large Independent Cohort Studies)                                                                               |
| <b>OAS</b>   | <i>de-novo</i> | Odense Androgen Study                               | Cross-sectional | Denmark                  | NA                       | Northern European      | Population-based | 581  | The Odense Androgen Study (OAS) is a population-based, prospective, observational study on endocrine status and bone metabolism in older men. 4875 males aged 60–74 years were randomly selected from the civil registration database in Funen County, Denmark, and invited by mail to participate in the study. A total of 3743 men returned the questionnaire, and 600 were included in the study.                                                                                                                                                                                                                                                                                                                                       | [PMID: 16418764] (Nielsen, 2006 Prevalence of overweight, obesity and physical inactivity in 20- to 29-year-old, Danish men. Relation to sociodemography, physical dysfunction and low socioeconomic status: the Odense Androgen Study); [PMID: 23370486] (Harsløf, 2013 Polymorphisms of muscle genes are associated with bone mass and incident osteoporotic fractures in Caucasians) |
| <b>OPRA</b>  | <i>de-novo</i> | Osteoporosis Population-based Risk Assessment Trial | Cohort          | United States of America | Western Washington State | European American      | Clinical based   | 972  | The OPRA Trial was conducted at Group Health Cooperative (GHC), a mixed-model health maintenance organization in western Washington State with more than 47,000 women enrollees aged 60 and older. Women aged 60–80 were eligible to participate if they had not taken hormone replacement therapy or other osteoporosis medications for at least 12 months. Potentially eligible women were identified from GHC enrollment files on the basis of age and computerized pharmacy information. All women who participated in the bone density testing examination completed a detailed baseline questionnaire assessing their demographic characteristics, fracture risk factors including previous fractures. Hip and other fracture events | [PMID: 15725986] (Lacroix, 2005 Evaluation of three population-based strategies for fracture prevention: results of the osteoporosis population-based risk assessment (OPRA) trial)                                                                                                                                                                                                     |

were regarded as exploratory outcomes and ascertained through December 31, 2000, by searching automated hospitalization and outpatient visit records for ICD-9 codes indicating the occurrence of nonpathologic fracture.

|                   |                |                                         |                             |          |            |                        |                    |      |                                                                                                                                                                                                                     |                                                                                                                                                                                                                                                                                                                                                                                                                                                                                            |
|-------------------|----------------|-----------------------------------------|-----------------------------|----------|------------|------------------------|--------------------|------|---------------------------------------------------------------------------------------------------------------------------------------------------------------------------------------------------------------------|--------------------------------------------------------------------------------------------------------------------------------------------------------------------------------------------------------------------------------------------------------------------------------------------------------------------------------------------------------------------------------------------------------------------------------------------------------------------------------------------|
| <b>OSTEOS-II</b>  | <i>de-novo</i> | Osteoporosis: SNPs To Environment Study | Cross-sectional             | Greece   | Athens     | Mediterranean European | Population-based   | 564  | OSTEOS is a cross-sectional study of unrelated men and women, aimed to assess genetic and environmental factors, especially nutrition, and their possible interactions on QUS parameters (BUA, SOS, SI)             |                                                                                                                                                                                                                                                                                                                                                                                                                                                                                            |
| <b>PERF</b>       | <i>de-novo</i> | Prospective Epidemiological Risk Factor | Randomized-controlled trial | Denmark  | Copenhagen | Northern European      | Clinical-based     | 3973 | The Prospective Epidemiological Risk Factor (PERF) Study is based on subjects who were screened for or enrolled into RCT to identify genetic and other risk factors of diseases in the elderly                      | [PMID: 17109061] (Bagger, 2006 Links between cardiovascular disease and osteoporosis in postmenopausal women: serum lipids or atherosclerosis per se?)                                                                                                                                                                                                                                                                                                                                     |
| <b>SLO-PREVAL</b> | <i>de-novo</i> | Prevalence of osteoporosis in Slovenia  | Cross-sectional             | Slovenia | Ljubljana  | Central European       | General Population | 716  | SLO-PREVAL study is a cross-sectional study where premenopausal women aged between 35-50 years and postmenopausal women and men aged over 50 years were included to perform genotype-phenotype association studies. | [PMID:12213850] (Arko, 2002 Sequence variations in the osteoprotegerin gene promoter in patients with postmenopausal osteoporosis); [PMID:18502820] (Mencej, 2008 Tumour necrosis factor superfamily member 11 gene promoter polymorphisms modulate promoter activity and influence bone mineral density in postmenopausal women with osteoporosis); [PMID:19781675] (Trošt, 2010 A microarray based identification of osteoporosis-related genes in primary culture of human osteoblasts) |

|                  |                  |                                                            |                    |        |           |                   |                                   |      |                                                                                                                                                                                                                                                                                                                                                                                                                                                                                                                                                                                                                                                                                                                                                                                                                           |                                                                                                                                                                                                                                                                                               |
|------------------|------------------|------------------------------------------------------------|--------------------|--------|-----------|-------------------|-----------------------------------|------|---------------------------------------------------------------------------------------------------------------------------------------------------------------------------------------------------------------------------------------------------------------------------------------------------------------------------------------------------------------------------------------------------------------------------------------------------------------------------------------------------------------------------------------------------------------------------------------------------------------------------------------------------------------------------------------------------------------------------------------------------------------------------------------------------------------------------|-----------------------------------------------------------------------------------------------------------------------------------------------------------------------------------------------------------------------------------------------------------------------------------------------|
| <b>TWINGENE</b>  | <i>in silico</i> | TwinGene                                                   | Cohort             | Sweden | Stockholm | Northern European | General population - Family based | 6347 | In the TwinGene project twins born before 1958 are contacted to participate. Health and medication data are collected from self-reported questionnaires, and blood sampling material is mailed to the subject who then contacts a local health care center for blood sampling and a health check-up. In the simple health check-up, height, weight, circumference of waist and hip, and blood pressure are measured. The follow-up data were linked to the baseline data by the personal identification numbers assigned to every resident. Fractures in the cohort were identified through linkage to the national Swedish Patient Register by use of the individual personal registration number provided to all citizens and by a comprehensive computer-assisted telephone interview conducted between 1998 and 2002. | [PMID: 16157825] (Michaëlsson, 2005 Genetic liability to fractures in the elderly); [PMID: 23137839] (Magnusson, 2013 The Swedish Twin Registry: establishment of a biobank and other recent developments)                                                                                    |
| <b>UFO-HIP</b>   | <i>in silico</i> | The Umeå Fracture and Osteoporosis Study - Hip Fractures   | Nested case-cohort | Sweden | Umeå      | Northern European | General population                | 1876 | The UFO study is a nested case-control study investigating associations between genes, lifestyle and osteoporotic fractures. The study is based on the prospective and populationbased Northern Sweden Health and Disease Study cohort, initiated to assess risk factors for diabetes and cardiovascular disease. Genome-wide association study data was generated for the hip fracture cases and matched controls.                                                                                                                                                                                                                                                                                                                                                                                                       | [PMID: 20464545] (Englund, 2010 Physical activity in middle-aged women and hip fracture risk: the UFO study); [PMID:14660243] (Hallmans, 2003 Cardiovascular disease and diabetes in the Northern Sweden Health and Disease Study Cohort - evaluation of risk factors and their interactions) |
| <b>UFO-WRIST</b> | <i>in silico</i> | The Umeå Fracture and Osteoporosis Study - Wrist Fractures | Nested case-cohort | Sweden | Umeå      | Northern European | General population                | 2115 | The UFO study is a nested case-control study investigating associations between genes, lifestyle and osteoporotic fractures. The study is based on the prospective and populationbased Northern Sweden Health and Disease Study cohort, initiated to assess risk factors for diabetes and cardiovascular disease. Genome-wide association study data was generated for the wrist fracture cases and matched controls.                                                                                                                                                                                                                                                                                                                                                                                                     | [PMID: 20464545] (Englund, 2010 Physical activity in middle-aged women and hip fracture risk: the UFO study); [PMID:14660243] (Hallmans, 2003 Cardiovascular disease and diabetes in the Northern Sweden Health and Disease Study Cohort - evaluation of risk factors and their interactions) |

|              |                  |                                              |                    |        |      |                   |                    |      |                                                                                                                                                                                                                                                                                                                   |                                                                                                                                                                                                                                                                                               |
|--------------|------------------|----------------------------------------------|--------------------|--------|------|-------------------|--------------------|------|-------------------------------------------------------------------------------------------------------------------------------------------------------------------------------------------------------------------------------------------------------------------------------------------------------------------|-----------------------------------------------------------------------------------------------------------------------------------------------------------------------------------------------------------------------------------------------------------------------------------------------|
| <b>UFO-2</b> | <i>in silico</i> | The Umeå Fracture and Osteoporosis Study - 2 | Nested case-cohort | Sweden | Umeå | Northern European | General population | 2022 | The UFO study is a nested case-control study investigating associations between genes, lifestyle and osteoporotic fractures. The study is based on the prospective and populationbased Northern Sweden Health and Disease Study cohort, initiated to assess risk factors for diabetes and cardiovascular disease. | [PMID: 20464545] (Englund, 2010 Physical activity in middle-aged women and hip fracture risk: the UFO study); [PMID:14660243] (Hallmans, 2003 Cardiovascular disease and diabetes in the Northern Sweden Health and Disease Study Cohort - evaluation of risk factors and their interactions) |
|--------------|------------------|----------------------------------------------|--------------------|--------|------|-------------------|--------------------|------|-------------------------------------------------------------------------------------------------------------------------------------------------------------------------------------------------------------------------------------------------------------------------------------------------------------------|-----------------------------------------------------------------------------------------------------------------------------------------------------------------------------------------------------------------------------------------------------------------------------------------------|

---

**Table S2A | Discovery study-specific descriptive statistics**

| Study    | Trait       | Men  |       |      |       |       | Women |       |      |       |       |
|----------|-------------|------|-------|------|-------|-------|-------|-------|------|-------|-------|
|          |             | N    | mean  | sd   | min   | max   | N     | mean  | sd   | min   | max   |
| AGES     | Age (yrs)   | 1351 | 76.5  | 5.3  | 67    | 94    | 1865  | 76.3  | 5.6  | 66    | 95    |
|          | Weight (kg) | 1351 | 83.2  | 13.3 | 42    | 144.7 | 1865  | 70.5  | 13.3 | 37.2  | 128.3 |
|          | Height (cm) | 1351 | 175.4 | 6.2  | 153.1 | 196.4 | 1865  | 160.9 | 5.8  | 139.3 | 182.6 |
| AOGC     | Age (yrs)   | 0    | NA    | NA   | NA    | NA    | 1951  | 69.6  | 8.6  | 48    | 86    |
|          | Weight (kg) | 0    | NA    | NA   | NA    | NA    | 1941  | 70.1  | 16.3 | 34.5  | 136   |
|          | Height (cm) | 0    | NA    | NA   | NA    | NA    | 1937  | 159.7 | 6.8  | 127.5 | 188   |
| BPROOF   | Age (yrs)   | 1085 | 73.6  | 6.2  | 64    | 98    | 1113  | 74.9  | 6.8  | 63    | 97    |
|          | Weight (kg) | 1085 | 83.1  | 11.8 | 48    | 180   | 1102  | 72.9  | 12.7 | 37    | 135   |
|          | Height (cm) | 1085 | 176   | 6.5  | 158.2 | 197.5 | 1101  | 162.7 | 6.5  | 138.7 | 189   |
| CHS      | Age (yrs)   | 1276 | 73.5  | 5.9  | 65    | 95    | 1985  | 73.0  | 5.9  | 65    | 101   |
|          | Weight (kg) | 1276 | 79.1  | 11.9 | 49.7  | 129.7 | 1985  | 66.1  | 13.2 | 33.3  | 132.9 |
|          | Height (cm) | 1276 | 173.3 | 6.5  | 151   | 192.5 | 1985  | 159.0 | 6.1  | 124   | 178   |
| DeCODE   | Age (yrs)   | 1136 | 66.1  | 14.2 | 20.1  | 96.1  | 6469  | 59.7  | 13.8 | 20    | 97.8  |
|          | Weight (kg) | 1136 | 83.4  | 14.4 | 38.4  | 129.5 | 6461  | 71.1  | 13.4 | 30    | 129.3 |
|          | Height (cm) | 1136 | 176.5 | 6.7  | 148.5 | 196   | 6469  | 164.4 | 6.2  | 116.5 | 188   |
| EGCUT-I  | Age (yrs)   | 2254 | 54.8  | 19.3 | 18    | 100   | 2258  | 55.9  | 21.1 | 18    | 103   |
|          | Weight (kg) | 2254 | 84.3  | 16.1 | 46    | 153   | 2258  | 72.3  | 15.8 | 28    | 145   |
|          | Height (cm) | 2254 | 177   | 7.3  | 154   | 206   | 2258  | 163.3 | 7    | 140   | 193   |
| EGCUT-II | Age (yrs)   | 875  | 40    | 16.6 | 18    | 90    | 912   | 40.5  | 15.6 | 18    | 91    |
|          | Weight (kg) | 875  | 84.1  | 15.3 | 50    | 191   | 912   | 70.8  | 16.1 | 39    | 160   |
|          | Height (cm) | 875  | 179.6 | 7.2  | 158   | 204   | 912   | 165.3 | 6.3  | 144   | 184   |
| EPICNOR  | Age (yrs)   | 9640 | 59.6  | 9.2  | 39.5  | 79.1  | 11023 | 58.7  | 9.3  | 39.8  | 78.2  |
|          | Weight (kg) | 9635 | 80.3  | 11.3 | 42.8  | 160.0 | 11015 | 67.8  | 11.6 | 36.0  | 139.2 |
|          | Height (cm) | 9631 | 174.0 | 6.6  | 139.4 | 200.2 | 11013 | 161.1 | 6.2  | 129.0 | 185.3 |

|         |             |      |       |      |       |       |      |       |       |       |       |
|---------|-------------|------|-------|------|-------|-------|------|-------|-------|-------|-------|
| ERF     | Age (yrs)   | 616  | 49.95 | 14.8 | 18.07 | 86.5  | 986  | 48.13 | 14.43 | 18.08 | 86.07 |
|         | Weight (kg) | 616  | 83.05 | 14.4 | 50.6  | 154.7 | 986  | 69.2  | 13.8  | 42.1  | 151.8 |
|         | Height (cm) | 616  | 174.5 | 7.3  | 152.2 | 196   | 986  | 161.7 | 6.6   | 141   | 182.8 |
| FHS     | Age (yrs)   | 1548 | 64.5  | 10.9 | 35    | 92    | 2081 | 64.9  | 11.5  | 29    | 96    |
|         | Weight (kg) | 1544 | 86    | 14.9 | 46.3  | 170.1 | 2066 | 69.8  | 15    | 36.3  | 158.8 |
|         | Height (cm) | 1540 | 174   | 7    | 152   | 200   | 2060 | 160   | 7     | 138   | 183   |
| GOOD    | Age (yrs)   | 938  | 18.9  | 0.6  | 18    | 20.1  | 0    | NA    | NA    | NA    | NA    |
|         | Weight (kg) | 938  | 73.9  | 11.6 | 51.3  | 127   | 0    | NA    | NA    | NA    | NA    |
|         | Height (cm) | 938  | 182   | 7    | 161   | 203   | 0    | NA    | NA    | NA    | NA    |
| HABC    | Age (yrs)   | 879  | 73.9  | 2.9  | 69    | 80    | 784  | 73.6  | 2.8   | 69    | 80    |
|         | Weight (kg) | 879  | 81.6  | 12.4 | 52.2  | 134.5 | 784  | 66.4  | 12.1  | 40.8  | 123   |
|         | Height (cm) | 879  | 173.6 | 6.4  | 151.1 | 194.8 | 784  | 159.4 | 5.8   | 141.6 | 175.6 |
| HKOS    | Age (yrs)   | 0    | NA    | NA   | NA    | NA    | 800  | 48.9  | 15.6  | 20    | 84    |
|         | Weight (kg) | 0    | NA    | NA   | NA    | NA    | 800  | 54.7  | 10.2  | 33.5  | 93.5  |
|         | Height (cm) | 0    | NA    | NA   | NA    | NA    | 800  | 155   | 6.7   | 127   | 175   |
| MROS    | Age (yrs)   | 5108 | 73.9  | 5.9  | 64    | 100   | 0    | NA    | NA    | NA    | NA    |
|         | Weight (kg) | 5108 | 83.6  | 13.1 | 50.8  | 144.1 | 0    | NA    | NA    | NA    | NA    |
|         | Height (cm) | 5108 | 174.5 | 6.6  | 147.2 | 198.9 | 0    | NA    | NA    | NA    | NA    |
| PROSPER | Age (yrs)   | 2524 | 75    | 3.3  | 70.2  | 83.3  | 2718 | 75.7  | 3.4   | 69.4  | 83.4  |
|         | Weight (kg) | 2524 | 78.7  | 11.9 | 40    | 127   | 2718 | 68.3  | 12.7  | 35.5  | 138   |
|         | Height (cm) | 2524 | 172.1 | 6.7  | 143   | 198   | 2718 | 158.8 | 6.6   | 135   | 180   |
| RS-I    | Age (yrs)   | 2427 | 68.1  | 8.2  | 55    | 97.8  | 3547 | 70.3  | 9.6   | 55    | 99.2  |
|         | Weight (kg) | 2375 | 78.6  | 10.7 | 41    | 122.3 | 3383 | 69.6  | 11.3  | 40.1  | 146.5 |
|         | Height (cm) | 2372 | 174.8 | 6.8  | 151   | 198   | 3375 | 161.3 | 6.6   | 101   | 191.5 |
| RS-II   | Age (yrs)   | 785  | 63.7  | 6.8  | 55.1  | 89.3  | 902  | 63.8  | 7.4   | 55.1  | 92.3  |
|         | Weight (kg) | 785  | 83.5  | 11.4 | 54    | 126.8 | 902  | 72.8  | 12.5  | 44.1  | 125.3 |
|         | Height (cm) | 785  | 176   | 6.5  | 156.8 | 203   | 902  | 162.9 | 6.2   | 141.5 | 189.6 |
| RS-III  | Age (yrs)   | 528  | 56.1  | 5.5  | 45.9  | 84.2  | 683  | 56.1  | 5.4   | 45.8  | 87.9  |
|         | Weight (kg) | 525  | 89.7  | 14.1 | 60.8  | 149.9 | 683  | 75.2  | 14.3  | 35    | 137.6 |

|        |             |       |       |       |       |       |       |       |      |       |       |
|--------|-------------|-------|-------|-------|-------|-------|-------|-------|------|-------|-------|
|        | Height (cm) | 525   | 178.8 | 6.7   | 160.5 | 197.5 | 683   | 165   | 6.2  | 146.5 | 184.5 |
| SOF    | Age (yrs)   | 0     | NA    | NA    | NA    | NA    | 3299  | 71.5  | 5.2  | 65    | 89    |
|        | Weight (kg) | 0     | NA    | NA    | NA    | NA    | 3260  | 67.8  | 11.9 | 40.8  | 112   |
|        | Height (cm) | 0     | NA    | NA    | NA    | NA    | 3281  | 159.4 | 5.8  | 142.5 | 175.5 |
| TUK123 | Age (yrs)   | 373   | 49.8  | 14.6  | 18.3  | 81.4  | 3962  | 49.9  | 13.5 | 16.2  | 82.1  |
|        | Weight (kg) | 373   | 80.4  | 11.8  | 40.5  | 122.7 | 3962  | 67.5  | 12.9 | 35.1  | 166   |
|        | Height (cm) | 365   | 175.1 | 7.1   | 161   | 191   | 3882  | 162.2 | 6.3  | 148   | 177   |
| UKBB   | Age (yrs)   | 68105 | 57.29 | 8.12  | 40    | 73    | 76949 | 56.62 | 7.93 | 39    | 73    |
|        | Weight (kg) | 68105 | 86.3  | 14.53 | 40.8  | 197.1 | 76949 | 71.66 | 14.2 | 32.1  | 196   |
|        | Height (cm) | 68105 | 175.6 | 6.77  | 122   | 205   | 76949 | 162.5 | 6.22 | 126   | 192   |
| WGHS   | Age (yrs)   | NA    | NA    | NA    | NA    | NA    | 22330 | 54.1  | 7.1  | 38    | 89    |
|        | Weight (kg) | NA    | NA    | NA    | NA    | NA    | 22330 | 70    | 14.2 | 38.6  | 175.1 |
|        | Height (cm) | NA    | NA    | NA    | NA    | NA    | 22330 | 164   | 6    | 13    | 201   |
| WHICT  | Age (yrs)   | NA    | NA    | NA    | NA    | NA    | 1705  | 69    | 6.4  | 50    | 79    |
|        | Weight (kg) | NA    | NA    | NA    | NA    | NA    | 1705  | 72.6  | 14.5 | 40    | 171.5 |
|        | Height (cm) | NA    | NA    | NA    | NA    | NA    | 1705  | 161.5 | 6.3  | 137   | 183.4 |
| WHIOS  | Age (yrs)   | NA    | NA    | NA    | NA    | NA    | 2592  | 69    | 6.5  | 50    | 79    |
|        | Weight (kg) | NA    | NA    | NA    | NA    | NA    | 2592  | 70.4  | 14.9 | 37.5  | 171.5 |
|        | Height (cm) | NA    | NA    | NA    | NA    | NA    | 2592  | 161.6 | 6.5  | 116   | 183.4 |
| YFS    | Age (yrs)   | 699   | 38    | 5     | 30    | 45    | 887   | 38    | 5    | 30    | 45    |
|        | Weight (kg) | 699   | 86    | 15.4  | 54    | 166   | 887   | 69.9  | 13.9 | 42    | 166   |
|        | Height (cm) | 699   | 179.5 | 6.6   | 157   | 203   | 887   | 166.3 | 5.9  | 147   | 189   |

---



**Table S2B | Replication study-specific descriptive statistics**

| Study          | Trait       | Men    |       |      |       |       | Women  |       |      |       |       |
|----------------|-------------|--------|-------|------|-------|-------|--------|-------|------|-------|-------|
|                |             | N      | mean  | sd   | min   | max   | N      | mean  | sd   | min   | max   |
| 23andMe        | Age (yrs)   | 141571 | 53.5  | 16.7 | 1     | 117   | 155714 | 53.2  | 16   | 1     | 117   |
|                | Weight (kg) | NA     | NA    | NA   | NA    | NA    | NA     | NA    | NA   | NA    | NA    |
|                | Height (cm) | NA     | NA    | NA   | NA    | NA    | NA     | NA    | NA   | NA    | NA    |
| AOGC-GOS       | Age (yrs)   | 1322   | 59.3  | 17.9 | 20    | 94    | 1600   | 54.3  | 19.6 | 20.3  | 95.5  |
|                | Weight (kg) | 1319   | 82.8  | 14.4 | 41.8  | 154.7 | 1598   | 68.8  | 14.4 | 35.3  | 138.9 |
|                | Height (cm) | 1321   | 174.2 | 7.2  | 153.6 | 201   | 1598   | 160.5 | 7    | 132.3 | 186   |
| AOGC-SHEFFIELD | Age (yrs)   | 0      | NA    | NA   | NA    | NA    | 3979   | 80.1  | 4    | 74.3  | 100   |
|                | Weight (kg) | 0      | NA    | NA   | NA    | NA    | 4008   | 65.1  | 11.3 | 35.8  | 116.3 |
|                | Height (cm) | 0      | NA    | NA   | NA    | NA    | 3971   | 155.9 | 6    | 134.3 | 178   |
| APOSS          | Age (yrs)   | 0      | NA    | NA   | NA    | NA    | 3268   | 48.5  | 2.4  | 44.2  | 56.3  |
|                | Weight (kg) | 0      | NA    | NA   | NA    | NA    | 3264   | 66    | 12   | 40    | 146   |
|                | Height (cm) | 0      | NA    | NA   | NA    | NA    | 3264   | 161.3 | 5.9  | 136   | 185   |
| AROS           | Age (yrs)   | 176    | 54.3  | 15.7 | 19    | 85    | 621    | 61.8  | 12.9 | 20    | 87    |
|                | Weight (kg) | 145    | 78.1  | 12.4 | 54.5  | 119   | 551    | 63.8  | 11   | 38.6  | 118.4 |
|                | Height (cm) | 144    | 176.2 | 7.4  | 158   | 203   | 548    | 161.7 | 6.7  | 143   | 194   |
| AUSTRIOS-A     | Age (yrs)   | 271    | 56.6  | 12   | 22    | 77    | 534    | 47.1  | 15.8 | 18    | 85    |
|                | Weight (kg) | 268    | 83.4  | 12.1 | 58    | 125   | 496    | 63.9  | 10.6 | 36    | 106   |
|                | Height (cm) | 268    | 176.7 | 6.6  | 160   | 197   | 496    | 164.2 | 6.3  | 148   | 183   |
| AUSTRIOS-B     | Age (yrs)   | 327    | 84.3  | 5.7  | 69    | 101   | 1737   | 83.9  | 6.2  | 68    | 103   |
|                | Weight (kg) | 314    | 68.2  | 12.5 | 39    | 113   | 1648   | 60.4  | 12.2 | 31    | 111   |
|                | Height (cm) | 312    | 164.9 | 8.2  | 140   | 185   | 1645   | 153.3 | 7.4  | 125   | 198   |
| BARCOS         | Age (yrs)   | 0      | NA    | NA   | NA    | NA    | 1451   | 65.5  | 9.1  | 35    | 100   |
|                | Weight (kg) | 0      | NA    | NA   | NA    | NA    | 1443   | 65    | 10.5 | 41    | 134   |

|              |             |      |       |      |      |       |      |       |      |      |       |
|--------------|-------------|------|-------|------|------|-------|------|-------|------|------|-------|
|              | Height (cm) | 0    | NA    | NA   | NA   | NA    | 1442 | 156.8 | 6.3  | 135  | 180   |
| CABRIO-C     | Age (yrs)   | 543  | 63.9  | 8.5  | 50   | 92    | 907  | 62    | 9.8  | 42   | 94    |
|              | Weight (kg) | 543  | 81.5  | 11   | 44.5 | 118.4 | 887  | 68.7  | 12   | 42   | 119   |
|              | Height (cm) | 543  | 168.2 | 6.1  | 150  | 189   | 889  | 155.9 | 6    | 138  | 188   |
| CABRIO-CC    | Age (yrs)   | 538  | 73.3  | 11.9 | 39   | 100   | 1771 | 74.5  | 12.3 | 43   | 104   |
|              | Weight (kg) | 326  | 78.1  | 11.4 | 46   | 137   | 995  | 65    | 10.4 | 36   | 110   |
|              | Height (cm) | 326  | 166.7 | 6.8  | 145  | 192   | 992  | 154.7 | 6.1  | 138  | 178   |
| CAIFOS       | Age (yrs)   | 0    | NA    | NA   | NA   | NA    | 1347 | 80.2  | 2.7  | 75   | 87    |
|              | Weight (kg) | 0    | NA    | NA   | NA   | NA    | 1135 | 67.6  | 12.1 | 39.6 | 114.4 |
|              | Height (cm) | 0    | NA    | NA   | NA   | NA    | 1137 | 157.5 | 6    | 115  | 178   |
| CALEX        | Age (yrs)   | 190  | 55.2  | 15.1 | 19.9 | 87.3  | 457  | 46    | 19   | 18   | 91.7  |
|              | Weight (kg) | 190  | 81.4  | 10.7 | 56.8 | 108.6 | 457  | 68.1  | 12.3 | 46.1 | 127   |
|              | Height (cm) | 190  | 175.9 | 6.5  | 154  | 194   | 457  | 164.2 | 6.2  | 148  | 180   |
| CAMOS        | Age (yrs)   | 705  | 65.4  | 16.6 | 18   | 95    | 1616 | 67.3  | 14.9 | 18   | 99    |
|              | Weight (kg) | 701  | 81.7  | 13.4 | 47.7 | 126.5 | 1601 | 69.4  | 13.7 | 38.2 | 158.5 |
|              | Height (cm) | 701  | 174.1 | 7.1  | 151  | 198   | 1600 | 160.6 | 6.4  | 141  | 182.9 |
| DOES         | Age (yrs)   | 569  | 75.6  | 5.5  | 61   | 90    | 888  | 76.2  | 6.3  | 60   | 99    |
|              | Weight (kg) | 569  | 78.4  | 13.2 | 43   | 128   | 888  | 65.2  | 13.1 | 33   | 128   |
|              | Height (cm) | 569  | 171.3 | 6.3  | 154  | 196   | 888  | 157.8 | 6.1  | 139  | 186   |
| DOPS         | Age (yrs)   | 0    | NA    | NA   | NA   | NA    | 1716 | 50.6  | 2.8  | 43.7 | 59    |
|              | Weight (kg) | 0    | NA    | NA   | NA   | NA    | 1715 | 67.7  | 11.8 | 34   | 135.5 |
|              | Height (cm) | 0    | NA    | NA   | NA   | NA    | 1715 | 164.5 | 6    | 147  | 189   |
| EDOS-EPICNOR | Age (yrs)   | 3253 | 60    | 10   | 17.2 | 93.1  | 5498 | 63    | 11.2 | 20.4 | 99.5  |
|              | Weight (kg) | 3234 | 80    | 12.5 | 40.6 | 144.8 | 5450 | 66.2  | 12.3 | 40   | 136.5 |
|              | Height (cm) | 3237 | 173.6 | 7    | 101  | 200   | 5480 | 159.6 | 6.8  | 102  | 190   |
| EPOLOS       | Age (yrs)   | 317  | 50.4  | 16.5 | 19.8 | 80.9  | 398  | 55.5  | 15.6 | 20   | 81.6  |
|              | Weight (kg) | 317  | 80    | 12.7 | 48   | 120   | 397  | 68    | 12.3 | 40   | 109   |

|         |             |      |       |      |       |       |      |       |      |       |       |
|---------|-------------|------|-------|------|-------|-------|------|-------|------|-------|-------|
|         | Height (cm) | 317  | 173.3 | 7.4  | 151   | 190   | 398  | 159.6 | 6.4  | 128   | 176   |
| EPOS    | Age (yrs)   | 719  | 62.9  | 8.2  | 43.9  | 90.4  | 1373 | 63.4  | 8.8  | 40.5  | 95    |
|         | Weight (kg) | 661  | 78.7  | 11.5 | 47    | 120   | 1177 | 68.1  | 11.5 | 41.3  | 115   |
|         | Height (cm) | 661  | 168.9 | 7.3  | 145   | 188   | 1179 | 157.4 | 6.9  | 136   | 186   |
| FLOS    | Age (yrs)   | 161  | 53.9  | 14.7 | 20    | 78    | 839  | 60.9  | 12   | 19    | 89    |
|         | Weight (kg) | 161  | 80.8  | 13.6 | 60    | 185   | 839  | 61.8  | 9.3  | 37    | 116   |
|         | Height (cm) | 161  | 175.6 | 7    | 156   | 192   | 839  | 160   | 6.7  | 138   | 181   |
| GEOS    | Age (yrs)   | 0    | NA    | NA   | NA    | NA    | 2379 | 53.8  | 9.6  | 18    | 84    |
|         | Weight (kg) | 0    | NA    | NA   | NA    | NA    | 2374 | 65    | 11.9 | 40.2  | 118.8 |
|         | Height (cm) | 0    | NA    | NA   | NA    | NA    | 2377 | 158.6 | 6    | 130   | 184   |
| GEVUR   | Age (yrs)   | 134  | 59.2  | 12.9 | 19    | 83    | 839  | 62.2  | 8.2  | 40    | 85    |
|         | Weight (kg) | 96   | 76.2  | 14   | 49    | 120   | 830  | 70.6  | 13.2 | 40    | 128   |
|         | Height (cm) | 97   | 170.8 | 7.5  | 156   | 192   | 833  | 159.3 | 6.3  | 134   | 185   |
| GEVUR-2 | Age (yrs)   | 402  | 60.6  | 12   | 31    | 87    | 11   | 58    | 9.6  | 40    | 71    |
|         | Weight (kg) | 402  | 78.1  | 14.7 | 45    | 133   | 11   | 67.8  | 10.7 | 50    | 83    |
|         | Height (cm) | 402  | 168.1 | 7.6  | 138   | 192   | 11   | 160.5 | 4.9  | 154   | 168   |
| GROS    | Age (yrs)   | 83   | 70.2  | 12.8 | 43    | 90    | 523  | 69.1  | 11.7 | 43    | 95    |
|         | Weight (kg) | 83   | 71.5  | 12.3 | 40    | 120   | 521  | 71.7  | 10.9 | 40    | 112   |
|         | Height (cm) | 83   | 164.8 | 10.4 | 121   | 182   | 523  | 161.8 | 7.3  | 146   | 182   |
| HCS     | Age (yrs)   | 1571 | 65.7  | 2.9  | 59.2  | 72.6  | 1356 | 66.7  | 2.7  | 60.9  | 73.1  |
|         | Weight (kg) | 1563 | 82.4  | 12.6 | 45.5  | 144.5 | 1354 | 71.2  | 13.2 | 40    | 135.5 |
|         | Height (cm) | 1564 | 174.1 | 6.5  | 149.6 | 195.6 | 1354 | 160.9 | 5.9  | 140.9 | 180.8 |
| HKOS    | Age (yrs)   | 1888 | 72.4  | 5    | 65    | 92    | 1984 | 72.6  | 5.4  | 65    | 98    |
|         | Weight (kg) | 1888 | 62.4  | 9.4  | 35.9  | 103.1 | 1984 | 54.5  | 8.5  | 28.8  | 89    |
|         | Height (cm) | 1888 | 163.1 | 5.8  | 141.9 | 187.2 | 1984 | 150.9 | 5.3  | 133.7 | 170.3 |
| KORAMC  | Age (yrs)   | 0    | NA    | NA   | NA    | NA    | 1397 | 59.5  | 7.4  | 45    | 87    |
|         | Weight (kg) | 0    | NA    | NA   | NA    | NA    | 1397 | 56.2  | 7.2  | 27    | 86    |

|           |             |      |       |      |       |       |       |       |      |       |       |
|-----------|-------------|------|-------|------|-------|-------|-------|-------|------|-------|-------|
|           | Height (cm) | 0    | NA    | NA   | NA    | NA    | 1397  | 155   | 5.3  | 121   | 171   |
| LASA      | Age (yrs)   | 464  | 72.4  | 6.5  | 61.9  | 85.6  | 485   | 72.6  | 6.6  | 61.8  | 85.3  |
|           | Weight (kg) | 440  | 77.9  | 11.3 | 47    | 119   | 449   | 71.6  | 12   | 42    | 120.5 |
|           | Height (cm) | 438  | 173.4 | 6.7  | 156.4 | 195.3 | 442   | 160.5 | 6.3  | 141.9 | 177.6 |
| MANMC     | Age (yrs)   | 0    | NA    | NA   | NA    | NA    | 1105  | 56.4  | 8.6  | 27    | 86    |
|           | Weight (kg) | 0    | NA    | NA   | NA    | NA    | 0     | NA    | NA   | NA    | NA    |
|           | Height (cm) | 0    | NA    | NA   | NA    | NA    | 0     | NA    | NA   | NA    | NA    |
| MINOS     | Age (yrs)   | 794  | 65.4  | 7.3  | 51    | 85    | 0     | NA    | NA   | NA    | NA    |
|           | Weight (kg) | 794  | 80.1  | 12.7 | 51    | 140   | 0     | NA    | NA   | NA    | NA    |
|           | Height (cm) | 794  | 169   | 6.3  | 147   | 188   | 0     | NA    | NA   | NA    | NA    |
| MOFS      | Age (yrs)   | 0    | NA    | NA   | NA    | NA    | 1046  | 64.4  | 8.9  | 40    | 79    |
|           | Weight (kg) | 0    | NA    | NA   | NA    | NA    | 1046  | 66.9  | 12.4 | 42    | 141   |
|           | Height (cm) | 0    | NA    | NA   | NA    | NA    | 1046  | 154   | 6.2  | 134   | 178   |
| MROSS     | Age (yrs)   | 2922 | 75.4  | 3.2  | 69.9  | 81    | 0     | NA    | NA   | NA    | NA    |
|           | Weight (kg) | 2922 | 80.7  | 12.1 | 37    | 138.3 | 0     | NA    | NA   | NA    | NA    |
|           | Height (cm) | 2922 | 174.8 | 6.5  | 145.2 | 199.4 | 0     | NA    | NA   | NA    | NA    |
| NOSOS     | Age (yrs)   | 0    | NA    | NA   | NA    | NA    | 1,268 | 69.7  | 5.5  | 60.2  | 82.2  |
|           | Weight (kg) | 0    | NA    | NA   | NA    | NA    | 1,291 | 67.8  | 12.3 | 40    | 132.5 |
|           | Height (cm) | 0    | NA    | NA   | NA    | NA    | 1,293 | 158.4 | 6    | 131   | 177   |
| OAS       | Age (yrs)   | 600  | 68.1  | 4.2  | 60    | 76    | 0     | NA    | NA   | NA    | NA    |
|           | Weight (kg) | 593  | 83.7  | 12.5 | 48    | 137.9 | 0     | NA    | NA   | NA    | NA    |
|           | Height (cm) | 593  | 174.3 | 6.7  | 128.4 | 191.8 | 0     | NA    | NA   | NA    | NA    |
| OPRA      | Age (yrs)   | 0    | NA    | NA   | NA    | NA    | 1044  | 75.2  | 0.2  | 75    | 76    |
|           | Weight (kg) | 0    | NA    | NA   | NA    | NA    | 1042  | 67.8  | 11.6 | 41    | 110   |
|           | Height (cm) | 0    | NA    | NA   | NA    | NA    | 1024  | 160.5 | 5.7  | 140   | 180   |
| OSTEOS-II | Age (yrs)   | 53   | 48.1  | 16.5 | 21    | 73    | 510   | 51.7  | 12.3 | 20    | 85    |
|           | Weight (kg) | 53   | 81.7  | 16.4 | 48.8  | 136.6 | 510   | 72.3  | 14.4 | 42.6  | 126.8 |

|            |             |      |       |       |      |       |      |       |       |       |       |
|------------|-------------|------|-------|-------|------|-------|------|-------|-------|-------|-------|
|            | Height (cm) | 53   | 173.2 | 7.5   | 154  | 185   | 510  | 161.1 | 6.4   | 142   | 185   |
| PERF       | Age (yrs)   | 0    | NA    | NA    | NA   | NA    | 3927 | 64.1  | 7.9   | 45.2  | 80.8  |
|            | Weight (kg) | 0    | NA    | NA    | NA   | NA    | 3973 | 66.1  | 9.7   | 36.1  | 116.6 |
|            | Height (cm) | 0    | NA    | NA    | NA   | NA    | 3973 | 161.8 | 6     | 134.3 | 190   |
| SLO-PREVAL | Age (yrs)   | 123  | 67.9  | 6.5   | 55   | 89    | 593  | 62.1  | 10.6  | 38    | 93    |
|            | Weight (kg) | 123  | 81.6  | 12.6  | 55   | 130   | 593  | 69.1  | 12.2  | 45    | 115   |
|            | Height (cm) | 123  | 171.7 | 6.3   | 159  | 192   | 593  | 160.4 | 6.3   | 137   | 181   |
| TWINGENE   | Age (yrs)   | 4432 | 65.6  | 8.04  | 47.6 | 93.3  | 4948 | 64.7  | 8.22  | 47.4  | 93.9  |
|            | Weight (kg) | 4349 | 81.9  | 12.22 | 50   | 179.1 | 4827 | 68.8  | 11.96 | 37.6  | 171.5 |
|            | Height (cm) | 4432 | 180   | 7     | 140  | 210   | 4948 | 160   | 6     | 140   | 190   |
| UFO-HIP    | Age (yrs)   | 807  | 60.4  | 12.1  | 20   | 91    | 1069 | 64.7  | 11.1  | 21    | 90    |
|            | Weight (kg) | 794  | 81.5  | 12.1  | 56   | 135   | 1037 | 67.9  | 12.6  | 40    | 132   |
|            | Height (cm) | 795  | 176.7 | 6.7   | 130  | 197   | 1035 | 163.4 | 6     | 144   | 184   |
| UFO-WRIST  | Age (yrs)   | 306  | 59    | 7.3   | 31.8 | 75.9  | 1809 | 61.6  | 6.7   | 39.2  | 80.1  |
|            | Weight (kg) | 305  | 83    | 13.1  | 56.5 | 163.2 | 1706 | 67.9  | 10.9  | 33    | 112   |
|            | Height (cm) | 305  | 176.6 | 5.8   | 160  | 192   | 1706 | 163.7 | 5.8   | 142   | 191   |
| UFO-2      | Age (yrs)   | 421  | 48.2  | 10.3  | 24   | 70    | 1601 | 53.3  | 10.2  | 19    | 80    |
|            | Weight (kg) | 421  | 82.1  | 11.4  | 51   | 129   | 1601 | 68.1  | 12.1  | 36    | 127   |
|            | Height (cm) | 421  | 177.9 | 6.1   | 152  | 198   | 1601 | 164   | 6.1   | 130   | 190   |

---

**Table S3A | Discovery study-specific fracture counts**

| <b>Study</b> | <b>Fracture Assessment Method</b>                                                                                                                       | <b>Fracture N</b> | <b>Non-Fracture N</b> | <b>Total</b>   |
|--------------|---------------------------------------------------------------------------------------------------------------------------------------------------------|-------------------|-----------------------|----------------|
| AGES         | Medical and radiographic records                                                                                                                        | 1,458             | 1,727                 | 3,185          |
| AOGC         | Questionnaire, radiography                                                                                                                              | 685               | 1,113                 | 1,798          |
| BPROOF       | History of fractures before baseline: questionnaire.<br>Incident fractures: self-report, validated at GP/hospital                                       | 715               | 1,483                 | 2,198          |
| CHS          | Self-report of incident fracture of the hip, leg, arm, or vertebra                                                                                      | 519               | 2,742                 | 3,261          |
| DeCODE       | Medical records, radiographic documentation, questionnaire                                                                                              | 1,836             | 14,560                | 16,396         |
| EGCUT-I      | Medical records, questionnaire                                                                                                                          | 217               | 4,296                 | 4,513          |
| EGCUT-II     | Medical records, questionnaire                                                                                                                          | 71                | 1,717                 | 1,788          |
| EPICNOR      | Medical records                                                                                                                                         | 2,926             | 17,710                | 20,636         |
| ERF          | Interview                                                                                                                                               | 260               | 1,342                 | 1,602          |
| FHS          | Medical records, questionnaire                                                                                                                          | 1,520             | 2,782                 | 4,302          |
| GOOD         | Radiographic document                                                                                                                                   | 273               | 597                   | 870            |
| HEALTHABC    | Radiographic                                                                                                                                            | 308               | 1,353                 | 1,661          |
| HKOS         | Medical records, Radiographic and Questionnaire                                                                                                         | 79                | 627                   | 706            |
| MROS         | Questionnaire, radiographic documentation                                                                                                               | 918               | 3,555                 | 4,473          |
| PROSPER      | Medical records                                                                                                                                         | 426               | 4,816                 | 5,242          |
| RS-I         | Medical records, questionnaire                                                                                                                          | 2,163             | 3,574                 | 5,737          |
| RS-II        | Medical records, questionnaire                                                                                                                          | 932               | 1,220                 | 2,152          |
| RS-III       | Medical records, questionnaire                                                                                                                          | 505               | 2,421                 | 2,926          |
| SOF          | Questionnaire, radiographic documentation                                                                                                               | 1,611             | 1,698                 | 3,309          |
| TUK123       | Medical records, Radiographic and Questionnaire                                                                                                         | 839               | 4,111                 | 4,950          |
| UKBB         | Questionnaire, based on answering yes to the question “Have you fractured/broken any bones in the last 5 years?” at either baseline or first follow-up. | 14,492            | 130,563               | 145,055        |
| WGHS         | Questionnaire                                                                                                                                           | 1,832             | 20,498                | 22,330         |
| WHICT        | Medical records                                                                                                                                         | 1,058             | 647                   | 1,705          |
| WHIOS        | Medical records                                                                                                                                         | 1,603             | 989                   | 2,592          |
| YFS          | Medical records                                                                                                                                         | 611               | 975                   | 1,586          |
| <b>Total</b> |                                                                                                                                                         | <b>37,857</b>     | <b>227,116</b>        | <b>264,973</b> |

**Table 3B | Replication study-specific fracture counts**

| Study          | Fracture Assessment Method                                                                                                                                                                                                    | Fracture N | Non-Fracture N | Total   |
|----------------|-------------------------------------------------------------------------------------------------------------------------------------------------------------------------------------------------------------------------------|------------|----------------|---------|
| 23andMe        | Questionnaire                                                                                                                                                                                                                 | 147,200    | 150,085        | 297,285 |
| AOGC-GOS       | Questionnaire, radiography                                                                                                                                                                                                    | 574        | 1,763          | 2,337   |
| AOGC-SHEFFIELD | Questionnaire, radiography lateral morphometry                                                                                                                                                                                | 1,373      | 2,013          | 3,386   |
| APOSS          | Self-reported                                                                                                                                                                                                                 | 560        | 2,275          | 2,835   |
| AROS           | Radiographic                                                                                                                                                                                                                  | 335        | 130            | 465     |
| AUSTRIOS-A     | Medical records, partly radiographic documentation                                                                                                                                                                            | 234        | 503            | 737     |
| AUSTRIOS-B     | Medical records, partly radiographic documentation                                                                                                                                                                            | 960        | 1,104          | 2,064   |
| BARCOS         | Medical records, radiographic documentation                                                                                                                                                                                   | 179        | 1,258          | 1,437   |
| CABRIO-C       | Patient-referred/Medical records                                                                                                                                                                                              | 341        | 1,109          | 1,450   |
| CABRIO-CC      | Patient-referred/Medical records                                                                                                                                                                                              | 1,122      | 1,193          | 2,315   |
| CAIFOS         | Self-reported xray report verified                                                                                                                                                                                            | 749        | 598            | 1,347   |
| CALEX          | First by questionnaire, then confirmed by medical records, radiographic documentation                                                                                                                                         | 113        | 411            | 524     |
| CAMOS          | Medical records, radiographic documentation                                                                                                                                                                                   | 410        | 1785           | 2,195   |
| DOES           | X-ray reports                                                                                                                                                                                                                 | 546        | 835            | 1,381   |
| DOPS           | Radiographic                                                                                                                                                                                                                  | 425        | 1,291          | 1,716   |
| EDOS           | Medical records, radiographic documentation                                                                                                                                                                                   | 1626       | 149            | 1,775   |
| EPICNOR        | Prevalent fractures were self-reported on questionnaire and (where possible) were confirmed by review of medical records and radiographic documentation.                                                                      | 1,647      | 2004           | 3,651   |
| EPOLOS         | Self-reports (fractures data from questionnaire filled in by physician)                                                                                                                                                       | 248        | 467            | 715     |
| EPOS           | Prevalent limb fractures were self-reported on questionnaire and (where possible) were confirmed by review of medical records and radiographic documentation. Prevalent vertebral fractures confirmed on baseline radiograph. | 564        | 1,168          | 1,732   |
| FLOS           | Medical records, radiographic documentation                                                                                                                                                                                   | 144        | 577            | 721     |
| GEOS           | 110 cases reported by the patient. No medical reports.                                                                                                                                                                        | 110        | 1,799          | 1,909   |
| GEVUR          | Medical records, radiographic documentation                                                                                                                                                                                   | 407        | 592            | 999     |
| GEVUR-2        | Medical records, radiographic documentation                                                                                                                                                                                   | 263        | 147            | 410     |
| GROS           | Medical records, radiographic documentation                                                                                                                                                                                   | 394        | 151            | 545     |
| HCS            | Self-report                                                                                                                                                                                                                   | 356        | 2,435          | 2,791   |
| HK             | X-ray films or radiology reports, medical record                                                                                                                                                                              | 794        | 3,078          | 3,872   |
| KORAMC         | Self-report and radiographic                                                                                                                                                                                                  | 171        | 1,226          | 1,397   |
| LASA           | Self-report (fracture calendar/interview), GP questionnaire (FX verified at GP or hospital)                                                                                                                                   | 326        | 623            | 949     |
| MANMC          | Medical records, Surgical Report, ICD-9 Codes                                                                                                                                                                                 | 848        | 0              | 848     |

|              |                                                                |                |                |                |
|--------------|----------------------------------------------------------------|----------------|----------------|----------------|
| MINOS        | Questionnaire and Radiographic                                 | 66             | 429            | 495            |
| MOFS         | Medical records, radiographic documentation                    | 262            | 764            | 1,026          |
| MROSS        | Prevalent: Questionnaire, Incident: Radiographic documentation | 1255           | 1,651          | 2,906          |
| NOSOS        | Self-report                                                    | 385            | 843            | 1,228          |
| OAS          | Radiographic                                                   | 97             | 503            | 600            |
| OPRA         | Medical records                                                | 493            | 479            | 972            |
| OSTEOS-II    | Medical records                                                | 100            | 447            | 547            |
| PERF         | Medical records, radiographic documentation                    | 1,051          | 2,405          | 3,456          |
| SLO-PREVAL   | Medical records                                                | 91             | 172            | 263            |
| TWINGENE     | Medical records, questionnaire                                 | 2,045          | 4,302          | 6,347          |
| UFO-HIP      | Medical records, radiographic documentation                    | 1,014          | 862            | 1,876          |
| UFO-WRIST    | Medical records, radiographic documentation                    | 1,060          | 1,055          | 2,115          |
| UFO-2        | Medical records, radiographic documentation                    | 191            | 1,831          | 2,022          |
| <b>Total</b> |                                                                | <b>171,129</b> | <b>196,512</b> | <b>367,641</b> |



Table S4A | Genotyping/Imputation discovery

| Cohort   | Genotyping                                                                                      |                            |                        |               |                |              | Imputation*         |                    |                                   | Association Analyses |                   |                   |           |
|----------|-------------------------------------------------------------------------------------------------|----------------------------|------------------------|---------------|----------------|--------------|---------------------|--------------------|-----------------------------------|----------------------|-------------------|-------------------|-----------|
|          | Platform                                                                                        | Genotype Calling Algorithm | Inclusion Criteria     |               |                | SNPs Post-QC | Imputation Software | Inclusion Criteria |                                   | Analysis Software    | No. analyzed SNPs | No. filtered SNPs | $\lambda$ |
|          |                                                                                                 |                            | MAF                    | Call Rate*    | P for HWE      |              |                     | MAF                | Imputation Quality*               |                      |                   |                   |           |
| AGES     | Illumina Hu370CNV                                                                               | Beadstudio GeneCall        | $\geq 1\%$             | $>97\%$       | $> 10^{-6}$    | 329,804      | MACH                | $\geq 1\%$         | MACH R2 $\geq 0.3$                | ProbABEL             | 2,409,007         | 6                 | 1.02      |
| AOGC     | Illumina Infinium II 370CNVQuad (n=1882); HumHap300 (n=140), 370CNVDuo (n=4) and 610Quad (n=10) | BeadStudio                 | $\geq 1\%$             | $\geq 98\%$   | $> 10^{-7}$    | 289,499      | MACH                | $\geq 1\%$         | MACH R2 $\geq 0.3$                | MACH-2DAT            | 2,407,019         | 384               | 1.02      |
| BPROOF   | Illumina Omni-express                                                                           | Beadstudio GeneCall        | $\geq 1\%$             | $\geq 97.5\%$ | $> 10^{-6}$    | 572,784      | MACH                | $\geq 1\%$         | MACH R2 $\geq 0.3$                | MACH-2DAT via GRIMP  | 2,450,941         | 59                | 1.01      |
| CHS      | Illumina 370CNV                                                                                 | BeadStudio                 | $> 1\%$                | $\geq 97\%$   | $> 10^{-5}$    | 306,655      | BimBam              | $\geq 1\%$         | (O/E) $\sigma^2$ ratio $\geq 0.3$ | R                    | 2,190,158         | 41                | 1.00      |
| DeCODE   | Illumina HH300 and 370CNV                                                                       | BeadStudio                 | $> 1\%$                | $> 96\%$      | $> 10^{-6}$    | 281,410      | IMPUTE              | $\geq 1\%$         | Prop_info $>0.4$                  | SNP-TEST             | 2,399,139         | 0                 | 1.13      |
| EGCUT-I  | Illumina HumanOmniExpress                                                                       | Genome Studio              | $> 1\%$                | $> 95\%$      | $> 10^{-6}$    | 617,595      | IMPUTE              | $\geq 1\%$         | Prop_info $>0.4$                  | SNP-TEST             | 2,434,283         | 379               | 1         |
| EGCUT-II | Illumina HumanCNV370                                                                            | Genome Studio              | $> 1\%$                | $> 95\%$      | $> 10^{-6}$    | 320,784      | IMPUTE              | $\geq 1\%$         | Prop_info $>0.4$                  | SNP-TEST             | 2,417,274         | 6,905             | 1.01      |
| EPICNOR  | UK BioBank Axiom                                                                                | Axiom GT1                  | Chip-specific criteria | $\geq 95\%$   | $> 10^{-8}$    | 728,244      | ShapeIT, IMPUTE     | See kept           | Prop_info $\geq 0.4$              | SNP-TEST             | 32,390,434        | 3,820,949         | 1.04      |
| ERF      | Illumina 318K, 370K, Affymetrix 250K                                                            | Beadstudio, BRLMM          | $> 1\%$                | $> 98\%$      | $> 10^{-6}$    | 487,573      | MACH                | $\geq 1\%$         | MACH R2 $\geq 0.3$                | ProbABEL             | 2,408,722         | 2,209             | 1.09      |
| FHS      | Affymetrix 500K Dual GeneChip + 50K gene-centered MIP set                                       | BRLMM                      | $\geq 1\%$             | $\geq 97\%$   | $\geq 10^{-6}$ | 378,163      | MACH                | $\geq 1\%$         | (O/E) $\sigma^2$ ratio $\geq 0.3$ | Kinship R-Package    | 2,411,851         | 0                 | 1         |
| GOOD     | Illumina / HumanHap 610 Quad                                                                    | Beadstudio GeneCall        | $\geq 1\%$             | $\geq 98\%$   | $> 10^{-6}$    | 521,160      | MACH                | $\geq 1\%$         | MACH R2 $\geq 0.3$                | MACH-2DAT via GRIMP  | 2,449,205         | 1,768             | 1.02      |
| HABC     | Illumina/ Human 1M-Duo                                                                          | Beadstudio                 | $\geq 1\%$             | $\geq 97\%$   | $> 10^{-6}$    | 914,263      | MACH                | $\geq 1\%$         | MACH R2 $\geq 0.3$                | SNP-TEST             | 2,469,391         | 747               | 0.99      |
| HKOS     | Illumina / Human610-Quad                                                                        | Illumina's GenomeStudio    | $\geq 1\%$             | $\geq 95\%$   | $> 10^{-4}$    | 488,853      | IMPUTE              | $\geq 1\%$         | Prop_info $>0.4$                  | SNP-TEST             | 2,091,885         | 13,395            | 1.02      |

|                       |                                                                      |                                                                            |      |         |                    |         |                                                                                |     |                |                     |            |            |      |
|-----------------------|----------------------------------------------------------------------|----------------------------------------------------------------------------|------|---------|--------------------|---------|--------------------------------------------------------------------------------|-----|----------------|---------------------|------------|------------|------|
| <b>MROS</b>           | Illumina HumanOmni1_Q uad_v1-0 B                                     | BeadStudio                                                                 | ≥1%  | ≥97%    | > 10 <sup>-4</sup> | 740,713 | MACH/<br>minimac                                                               | ≥1% | MACH R2 ≥ 0.3  | MACH-2DAT           | 2,460,836  | 4,365      | 1.01 |
| <b>PROSPER/PH ASE</b> | Illumina Beadchip 660K-quad                                          | Beadstudio Gencall                                                         | ≥ 1% | ≥ 97.5% | > 10 <sup>-6</sup> | 557,192 | MACH                                                                           | ≥1% | MACH R2 ≥ 0.3  | PLINK               | 2,448,014  | 270        | 1    |
| <b>RS-I</b>           | Illumina / HumanHap 550K V.3 /HumanHap 550 V.3 DUO;                  | Beadstudio Gencall                                                         | ≥ 1% | ≥ 97.5% | > 10 <sup>-6</sup> | 512,349 | MACH                                                                           | ≥1% | MACH R2 ≥ 0.3  | MACH-2DAT via GRIMP | 2,448,227  | 0          | 1.02 |
| <b>RS-II</b>          | Illumina / HumanHap 550K V.3 /HumanHap 550 V.3 DUO;                  | Beadstudio Gencall                                                         | ≥ 1% | ≥ 97.5% | > 10 <sup>-6</sup> | 466,389 | MACH                                                                           | ≥1% | MACH R2 ≥ 0.3  | MACH-2DAT via GRIMP | 2,447,128  | 5,051      | 1.00 |
| <b>RS-III</b>         | Illumina / HumanHap610                                               | Beadstudio Gencall                                                         | ≥ 1% | ≥ 97.5% | > 10 <sup>-6</sup> | 514,073 | MACH                                                                           | ≥1% | MACH R2 ≥ 0.3  | MACH-2DAT via GRIMP | 2,447,902  | 166        | 1.03 |
| <b>SOF</b>            | Illumina HumanOmni1_Q uad_v1-0 B                                     | BeadStudio                                                                 | ≥1%  | ≥97%    | > 10 <sup>-4</sup> | 740,713 | MACH/<br>minimac                                                               | ≥1% | MACH R2 ≥ 0.3  | MACH-2DAT           | 2,368,741  | 17         | 1    |
| <b>TUK-1,2,3</b>      | Illumina HumanHap 300 & 550. Illumina HumanCNV370 Duo. Illumina 610k | Beadstudio Gencall                                                         | ≥ 1% | ≥ 95%   | > 10 <sup>-6</sup> | 545,026 | IMPUTE                                                                         | ≥1% | Prop_info >0.4 | Gen-ABEL            | 2,376,877  | 26         | 1    |
| <b>UKBB</b>           | UK Biobank Axiom Array (N~450,000) and UK BiLEVE Array (N~50,000)    | Affymetrix Power Tools software and the Affymetrix Best Practices Workflow | <1%  |         |                    | 641,018 | Phasing: Modified version of SHAPEIT2; Imputation: modified version of IMPUTE2 | <1% | 0.3            | BOLT-LMM            | 72,355,668 | 54,968,115 |      |
| <b>WGHS</b>           | Illumina/HumanHap300 Duo Plus                                        | Beadstudio v3.3                                                            | > 1% | ≥ 98%   | > 10 <sup>-6</sup> | 339,596 | MACH                                                                           | ≥1% | MACH R2 ≥ 0.3  | Prob-ABEL           | 2,435,874  | 0          | 1.00 |
| <b>WHICT</b>          | Illumina HumanHap 550K, Illumina HumanHap 610K                       | Beadstudio Gencall                                                         | ≥ 1% | ≥ 98%   | > 10 <sup>-6</sup> | 499,982 | MACH                                                                           | ≥1% | MACH R2 ≥ 0.3  | R                   | 2,454,978  | 117        | 1.02 |
| <b>WHIOS</b>          | Illumina HumanHap 550K, Illumina HumanHap 610K                       | Beadstudio Gencall                                                         | ≥ 1% | ≥ 98%   | > 10 <sup>-6</sup> | 499,982 | MACH                                                                           | ≥1% | MACH R2 ≥ 0.3  | R                   | 2,456,006  | 22         | 0.99 |
| <b>YFS</b>            | Illumina Custom BeadChip Human670K                                   | Illumina                                                                   | > 1% | > 95%   | > 10 <sup>-6</sup> | 546,677 | MACH                                                                           | ≥1% | MACH R2 ≥ 0.3  | Prob ABEL           | 2,424,091  | 135        | 1.02 |

\*23 cohorts were imputed to HapMap release 22, EPIC was imputed to 1,000 genomes reference panel only and UKBB was imputed using UK10K consortium panel combined with the 1000 genomes reference panel



**Table S4B | Genotyping GENOMOS replication**

| Study          | Genotyping        |                |               |              |                 |
|----------------|-------------------|----------------|---------------|--------------|-----------------|
|                | Genotyping Centre | Genotyped SNPs | SNP Call Rate | SNPs Post-QC | Samples Post-QC |
| AOGC-GOS       | AOGC              | 2              | >90%          | 2            | 2,635           |
| AOGC-SHEFFIELD | AOGC              | 2              | >90%          | 2            | 3,817           |
| APOSS          | KBIO              | 2              | >90%          | 2            | 3,066           |
| AROS           | KBIO              | 24             | >90%          | 23           | 802             |
| AUSTRIOS-A     | KBIO              | 24             | >90%          | Failed       | Failed          |
| AUSTRIOS-B     | KBIO              | 24             | >90%          | 20           | 1,017           |
| BARCOS         | KBIO              | 24             | >90%          | 21           | 1,437           |
| CABRIO-C       | KBIO              | 24             | >90%          | 21           | 1,508           |
| CABRIO-CC      | KBIO              | 24             | >90%          | 20           | 2,233           |
| CAIFOS         | KBIO              | 24             | >90%          | 21           | 1,341           |
| CALEX          | KBIO              | 24             | >90%          | 21           | 989             |
| CAMOS          | KBIO              | 24             | >90%          | 20           | 2,384           |
| DOES           | DECODE            | 2              | >90%          | 2            | 1,347           |
| DOPS           | KBIO              | 24             | >90%          | 20           | 1,732           |
| EDOS           | KBIO              | 24             | >90%          | 22           | 2,644           |
| EPICNOR        | KBIO              | 22             | >90%          | 22           | 3,978           |
| EPOLOS         | KBIO              | 2              | >90%          | 2            | 688             |
| EPOS           | KBIO              | 9              | >90%          | 7            | 2,003           |
| FLOS           | KBIO              | 24             | >90%          | 23           | 1,465           |
| GEOS           | KBIO              | 24             | >90%          | 21           | 2,330           |
| GEVUR          | KBIO              | 24             | >90%          | 23           | 1,035           |
| GEVUR-2        | KBIO              | 22             | >90%          | 22           | 433             |
| GROS           | KBIO              | 24             | >90%          | 21           | 491             |
| HCS            | KBIO              | 24             | >90%          | 22           | 3,196           |
| HKOS           | KBIO/DECODE       | 24             | >90%          | 24           | 3,884           |

|            |             |    |      |    |       |
|------------|-------------|----|------|----|-------|
| KORAMC     | KBIO/DECODE | 24 | >90% | 23 | 1,397 |
| LASA       | KBIO        | 24 | >90% | 22 | 1,171 |
| MANMC      | KBIO        | 24 | >90% | 22 | 1,038 |
| MINOS      | KBIO        | 22 | >90% | 22 | 742   |
| MOFS       | KBIO        | 22 | >90% | 22 | 1,029 |
| MROSS      | KBIO        | 24 | >90% | 19 | 2,825 |
| NOSOS      | KBIO        | 2  | >90% | 2  | 1,191 |
| OAS        | KBIO        | 24 | >90% | 23 | 590   |
| OPRA       | KBIO        | 22 | >90% | 21 | 1,022 |
| OSTEOS-II  | KBIO        | 22 | >90% | 21 | 573   |
| PERF       | KBIO        | 2  | >90% | 2  | 3,346 |
| SLO-PREVAL | KBIO        | 24 | >90% | 22 | 708   |
| UFO-1      | KBIO        | 24 | >90% | 23 | 2,033 |

---

**Table S4C | Genotyping/Imputation in silico replication**

| Cohort    | Platform                   | Genotyping                 |                    |               | SNPs Post-QC | Imputation          |                    |                | Association Analyses |                    |                     |
|-----------|----------------------------|----------------------------|--------------------|---------------|--------------|---------------------|--------------------|----------------|----------------------|--------------------|---------------------|
|           |                            | Genotype Calling Algorithm | Inclusion Criteria |               |              | Imputation Software | Inclusion Criteria |                | Analysis Software    | N SNPs Analysed    |                     |
|           |                            |                            | MAF                | Call Rate*    |              |                     | HWE P-value        | MAF            |                      |                    | Imputation Quality* |
| 23andMe   |                            |                            |                    |               |              | Minimac3            |                    | $R^2 \geq 0.5$ | C++                  | 20                 |                     |
| UFO-hip   | Illumina 660 Quad Array    | Beadstudio<br>Genecall     | $\geq 1\%$         | $\geq 97.5\%$ | $> 10^{-6}$  | 531,659             | MACH               | $\geq 1\%$     | $MACH R^2 \geq 0.3$  | MACH2DAT via GRIMP | 49                  |
| UFO-wrist | Illumina Omni Express      | Beadstudio<br>Genecall     | $\geq 1\%$         | $\geq 97.5\%$ | $> 10^{-6}$  | 663,853             | MACH               | $\geq 1\%$     | $MACH R^2 \geq 0.3$  | MACH2DAT via GRIMP | 49                  |
| TwinGene  | Illumina Omni-express 700k | GenomeStudio 2010.3        | $\geq 1\%$         | $\geq 97\%$   | $> 10^{-7}$  | 644,556             | IMPUTE2            | $\geq 1\%$     | Prop_info $\geq 0.4$ | PLINK              | 47<br>(2,432,506)*  |

\* complete sample size for secondary analyses

**Table S5A | Number of SNPs and Variance explained by Instrumental Variables for Each Risk Factor**

| <b>Disease or Trait</b>             | <b>N SNPs</b> | <b>Variance Explained by SNPs</b> | <b>Reference</b> |
|-------------------------------------|---------------|-----------------------------------|------------------|
| <b>Femoral Neck BMD</b>             | <b>43</b>     | 5.8%                              | 15               |
| <b>Lumbar Spine BMD</b>             | <b>40</b>     | 6.4%                              | 15               |
| <b>Age at Menopause</b>             | <b>54</b>     | 6.0%                              | 21               |
| <b>Rheumatoid Arthritis*</b>        | 30            | 5.5%*                             | 31               |
| <b>Type 1 Diabetes</b>              | 19            | 6.7%                              | 32               |
| <b>Inflammatory Bowel Disease**</b> | 151           | 7.5%                              | 26               |
| <b>Thyroid-Stimulating Hormone</b>  | 20            | 5.6%                              | 25               |
| <b>Grip Strength</b>                | 15            | 1.4%                              | 22               |
| <b>Age of Puberty</b>               | 106           | 2.7%                              | 20               |
| <b>Fasting Glucose</b>              | 35            | 6.0%                              | 27,28            |
| <b>Coronary Heart Disease</b>       | 38            | 5.7%                              | 33               |
| <b>Type 2 Diabetes</b>              | 38            | 5.7%                              | 30               |
| <b>Vitamin D</b>                    | 4             | 2.4%                              | 23,24            |
| <b>Milk Calcium Intake</b>          | 1             | n/a                               | 69               |

\*The variance explained in rheumatoid arthritis by these SNPs is at least 5.5%, as this estimate excludes the MHC locus.

\*\*The variance explained by SNPs for IBD is based on ulcerative colitis. The variance explained for Crohn's disease is 13.6%.

**Table S5B | Individual summary statistics from the SNP-Exposure/Fracture association**

| <i>Trait</i> | SNP        | EA | NEA | EAF  | Summary Statistics from SNP-Exposure Associations |       |                       | Summary Statistic for SNP-Fracture Associations |       |                       |
|--------------|------------|----|-----|------|---------------------------------------------------|-------|-----------------------|-------------------------------------------------|-------|-----------------------|
|              |            |    |     |      | Beta                                              | se    | p-value               | Beta                                            | se    | p-value               |
| FN BMD       |            |    |     |      |                                                   |       |                       |                                                 |       |                       |
|              | rs10048146 | G  | A   | 0.80 | -0.056                                            | 0.011 | 1.0x10 <sup>-14</sup> | 0.022                                           | 0.010 | 0.04                  |
|              | rs1026364  | G  | T   | 0.37 | -0.041                                            | 0.009 | 4.1x10 <sup>-10</sup> | -0.009                                          | 0.009 | 0.32                  |
|              | rs1053051  | T  | C   | 0.48 | -0.036                                            | 0.008 | 9.6x10 <sup>-10</sup> | 0.021                                           | 0.008 | 0.01                  |
|              | rs11623869 | T  | G   | 0.65 | -0.041                                            | 0.009 | 5.2x10 <sup>-16</sup> | 0.026                                           | 0.009 | 2.7x10 <sup>-3</sup>  |
|              | rs12407028 | C  | T   | 0.60 | -0.048                                            | 0.008 | 3.4x10 <sup>-23</sup> | 0.022                                           | 0.008 | 0.01                  |
|              | rs1286083  | T  | C   | 0.19 | -0.059                                            | 0.011 | 2.0x10 <sup>-15</sup> | 0.042                                           | 0.011 | 7.9x10 <sup>-5</sup>  |
|              | rs13336428 | A  | G   | 0.57 | -0.043                                            | 0.008 | 1.5x10 <sup>-16</sup> | -0.009                                          | 0.008 | 0.28                  |
|              | rs1346004  | A  | G   | 0.50 | -0.052                                            | 0.008 | 1.1x10 <sup>-25</sup> | -0.015                                          | 0.008 | 0.07                  |
|              | rs1366594  | C  | A   | 0.54 | -0.092                                            | 0.008 | 4.5x10 <sup>-61</sup> | 0.023                                           | 0.008 | 0.01                  |
|              | rs1373004  | T  | G   | 0.87 | -0.055                                            | 0.013 | 1.5x10 <sup>-8</sup>  | 0.084                                           | 0.013 | 1.1x10 <sup>-10</sup> |
|              | rs1566045  | T  | C   | 0.20 | -0.074                                            | 0.011 | 1.9x10 <sup>-22</sup> | 0.031                                           | 0.011 | 0.01                  |
|              | rs163879   | T  | C   | 0.32 | -0.042                                            | 0.009 | 2.1x10 <sup>-8</sup>  | 0.031                                           | 0.009 | 4.6x10 <sup>-4</sup>  |
|              | rs17040773 | C  | A   | 0.76 | -0.045                                            | 0.010 | 1.5x10 <sup>-9</sup>  | 0.020                                           | 0.010 | 0.05                  |
|              | rs2016266  | A  | G   | 0.32 | -0.045                                            | 0.009 | 3.7x10 <sup>-10</sup> | 0.024                                           | 0.009 | 5.0x10 <sup>-3</sup>  |
|              | rs2062377  | A  | T   | 0.43 | -0.063                                            | 0.008 | 9.1x10 <sup>-25</sup> | -0.007                                          | 0.008 | 0.40                  |
|              | rs227584   | A  | C   | 0.30 | -0.060                                            | 0.009 | 2.6x10 <sup>-24</sup> | 0.041                                           | 0.009 | 4.9x10 <sup>-6</sup>  |



|           |   |   |      |        |       |                       |        |       |                       |
|-----------|---|---|------|--------|-------|-----------------------|--------|-------|-----------------------|
| rs2887571 | A | G | 0.24 | -0.037 | 0.010 | 6.5x10 <sup>-9</sup>  | 0.024  | 0.010 | 0.01                  |
| rs3736228 | T | C | 0.84 | -0.054 | 0.011 | 4.8x10 <sup>-11</sup> | 0.047  | 0.011 | 3.7x10 <sup>-5</sup>  |
| rs3755955 | A | G | 0.84 | -0.061 | 0.012 | 1.5x10 <sup>-14</sup> | 0.047  | 0.012 | 4.7x10 <sup>-5</sup>  |
| rs3790160 | C | T | 0.50 | -0.043 | 0.008 | 3.6x10 <sup>-12</sup> | 0.004  | 0.008 | 0.65                  |
| rs3801387 | A | G | 0.26 | -0.071 | 0.009 | 5.0x10 <sup>-40</sup> | 0.062  | 0.009 | 1.7x10 <sup>-11</sup> |
| rs430727  | T | C | 0.52 | -0.074 | 0.009 | 4.4x10 <sup>-25</sup> | 0.032  | 0.008 | 1.2x10 <sup>-4</sup>  |
| rs4727338 | G | C | 0.67 | -0.081 | 0.009 | 8.1x10 <sup>-48</sup> | 0.051  | 0.009 | 4.4x10 <sup>-9</sup>  |
| rs4790881 | C | A | 0.69 | -0.051 | 0.009 | 9.8x10 <sup>-19</sup> | 0.021  | 0.009 | 0.02                  |
| rs479336  | T | G | 0.26 | -0.050 | 0.009 | 8.5x10 <sup>-15</sup> | 0.003  | 0.009 | 0.75                  |
| rs4796995 | G | A | 0.63 | -0.040 | 0.009 | 4.9x10 <sup>-8</sup>  | 0.060  | 0.008 | 1.9x10 <sup>-12</sup> |
| rs4869742 | T | C | 0.69 | -0.068 | 0.009 | 4.2x10 <sup>-18</sup> | 0.043  | 0.009 | 1.9x10 <sup>-6</sup>  |
| rs4985155 | A | G | 0.33 | -0.031 | 0.009 | 1.7x10 <sup>-10</sup> | 0.005  | 0.009 | 0.55                  |
| rs6426749 | G | C | 0.17 | -0.108 | 0.011 | 7.4x10 <sup>-57</sup> | 0.052  | 0.011 | 1.9x10 <sup>-6</sup>  |
| rs6532023 | G | T | 0.34 | -0.051 | 0.009 | 5.0x10 <sup>-26</sup> | 0.012  | 0.009 | 0.18                  |
| rs6959212 | T | C | 0.68 | -0.030 | 0.009 | 1.2x10 <sup>-13</sup> | 0.039  | 0.009 | 6.4x10 <sup>-6</sup>  |
| rs7084921 | C | T | 0.39 | -0.032 | 0.008 | 9.0x10 <sup>-10</sup> | -0.004 | 0.008 | 0.60                  |
| rs7108738 | T | G | 0.17 | -0.093 | 0.011 | 1.1x10 <sup>-32</sup> | 0.026  | 0.011 | 0.02                  |
| rs7217932 | G | A | 0.46 | -0.045 | 0.008 | 1.9x10 <sup>-11</sup> | 0.021  | 0.008 | 0.01                  |
| rs7584262 | C | T | 0.23 | -0.053 | 0.010 | 1.3x10 <sup>-9</sup>  | 0.023  | 0.010 | 0.02                  |
| rs7812088 | G | A | 0.13 | -0.061 | 0.013 | 7.3x10 <sup>-9</sup>  | 0.035  | 0.013 | 4.9x10 <sup>-3</sup>  |
| rs7851693 | G | A | 0.64 | -0.047 | 0.009 | 3.4x10 <sup>-22</sup> | 0.034  | 0.009 | 1.3x10 <sup>-4</sup>  |

|           |   |   |      |        |       |                       |       |       |                       |
|-----------|---|---|------|--------|-------|-----------------------|-------|-------|-----------------------|
| rs7932354 | C | T | 0.31 | -0.050 | 0.009 | 5.1x10 <sup>-18</sup> | 0.029 | 0.009 | 1.2x10 <sup>-3</sup>  |
| rs7953528 | T | A | 0.18 | -0.058 | 0.011 | 1.9x10 <sup>-12</sup> | 0.007 | 0.011 | 0.53                  |
| rs884205  | A | C | 0.73 | -0.042 | 0.010 | 3.2x10 <sup>-10</sup> | 0.007 | 0.010 | 0.49                  |
| rs9466056 | A | G | 0.62 | -0.048 | 0.008 | 2.7x10 <sup>-13</sup> | 0.020 | 0.008 | 0.02                  |
| rs9533090 | T | C | 0.51 | -0.054 | 0.008 | 4.9x10 <sup>-23</sup> | 0.028 | 0.008 | 7.5x10 <sup>-04</sup> |
| rs9921222 | T | C | 0.52 | -0.043 | 0.008 | 5.2x10 <sup>-12</sup> | 0.021 | 0.008 | 0.01                  |

LS BMD

|            |   |   |      |        |       |                       |        |       |                       |
|------------|---|---|------|--------|-------|-----------------------|--------|-------|-----------------------|
| rs10048146 | G | A | 0.80 | -0.061 | 0.011 | 3.1x10 <sup>-11</sup> | 0.022  | 0.010 | 0.04                  |
| rs10416218 | T | C | 0.27 | -0.056 | 0.010 | 6.6x10 <sup>-11</sup> | 0.012  | 0.009 | 0.21                  |
| rs10835187 | T | C | 0.45 | -0.036 | 0.009 | 4.9x10 <sup>-8</sup>  | 0.020  | 0.008 | 0.02                  |
| rs11623869 | T | G | 0.65 | -0.030 | 0.009 | 5.1x10 <sup>-11</sup> | 0.026  | 0.009 | 0.003                 |
| rs11755164 | C | T | 0.60 | -0.052 | 0.010 | 5.6x10 <sup>-11</sup> | -0.014 | 0.009 | 0.09                  |
| rs12407028 | C | T | 0.60 | -0.081 | 0.009 | 3.1x10 <sup>-45</sup> | 0.022  | 0.008 | 0.01                  |
| rs12821008 | C | T | 0.39 | -0.047 | 0.009 | 1.2x10 <sup>-15</sup> | 0.011  | 0.008 | 0.19                  |
| rs1286083  | T | C | 0.19 | -0.074 | 0.011 | 1.8x10 <sup>-14</sup> | 0.042  | 0.011 | 7.9x10 <sup>-5</sup>  |
| rs13204965 | C | A | 0.76 | -0.044 | 0.012 | 3.6x10 <sup>-10</sup> | -0.013 | 0.010 | 0.20                  |
| rs13336428 | A | G | 0.57 | -0.036 | 0.009 | 1.7x10 <sup>-13</sup> | -0.009 | 0.008 | 0.28                  |
| rs1346004  | A | G | 0.50 | -0.049 | 0.009 | 3.9x10 <sup>-30</sup> | -0.015 | 0.008 | 0.07                  |
| rs1373004  | T | G | 0.87 | -0.073 | 0.014 | 1.6x10 <sup>-12</sup> | 0.084  | 0.013 | 1.1x10 <sup>-10</sup> |
| rs163879   | T | C | 0.32 | -0.049 | 0.009 | 2.2x10 <sup>-11</sup> | 0.031  | 0.009 | 4.6x10 <sup>-4</sup>  |
| rs1864325  | T | C | 0.78 | -0.057 | 0.011 | 4.9x10 <sup>-11</sup> | 0.014  | 0.010 | 0.18                  |

|           |   |   |      |        |       |                       |        |       |                       |
|-----------|---|---|------|--------|-------|-----------------------|--------|-------|-----------------------|
| rs1878526 | G | A | 0.22 | -0.048 | 0.011 | $1.2 \times 10^{-10}$ | -0.001 | 0.010 | 0.91                  |
| rs2016266 | A | G | 0.32 | -0.063 | 0.009 | $3.0 \times 10^{-20}$ | 0.024  | 0.009 | $4.96 \times 10^{-3}$ |
| rs2062377 | A | T | 0.43 | -0.081 | 0.009 | $3.2 \times 10^{-39}$ | -0.007 | 0.008 | 0.40                  |
| rs227584  | A | C | 0.30 | -0.048 | 0.010 | $9.9 \times 10^{-10}$ | 0.041  | 0.009 | $4.9 \times 10^{-6}$  |
| rs2887571 | A | G | 0.24 | -0.052 | 0.010 | $5.6 \times 10^{-12}$ | 0.024  | 0.010 | 0.01                  |
| rs344081  | C | T | 0.87 | -0.057 | 0.014 | $4.5 \times 10^{-12}$ | 0.015  | 0.012 | 0.22                  |
| rs3736228 | T | C | 0.84 | -0.081 | 0.012 | $2.1 \times 10^{-26}$ | 0.047  | 0.011 | $3.71 \times 10^{-5}$ |
| rs3755955 | A | G | 0.84 | -0.068 | 0.013 | $5.2 \times 10^{-15}$ | 0.047  | 0.012 | $4.73 \times 10^{-5}$ |
| rs3790160 | C | T | 0.50 | -0.057 | 0.009 | $3.1 \times 10^{-19}$ | 0.004  | 0.008 | 0.65                  |
| rs3801387 | A | G | 0.26 | -0.083 | 0.010 | $3.2 \times 10^{-51}$ | 0.062  | 0.009 | $1.7 \times 10^{-11}$ |
| rs3905706 | C | T | 0.22 | -0.063 | 0.011 | $2.4 \times 10^{-16}$ | -0.008 | 0.010 | 0.46                  |
| rs4233949 | G | C | 0.38 | -0.062 | 0.009 | $2.3 \times 10^{-18}$ | 0.033  | 0.008 | $7.0 \times 10^{-5}$  |
| rs430727  | T | C | 0.52 | -0.056 | 0.009 | $1.5 \times 10^{-18}$ | 0.032  | 0.008 | $1.2 \times 10^{-4}$  |
| rs4727338 | G | C | 0.67 | -0.074 | 0.009 | $2.1 \times 10^{-35}$ | 0.051  | 0.009 | $4.4 \times 10^{-9}$  |
| rs4792909 | G | T | 0.37 | -0.052 | 0.009 | $9.4 \times 10^{-10}$ | 0.058  | 0.009 | $7.8 \times 10^{-12}$ |
| rs4869742 | T | C | 0.69 | -0.087 | 0.009 | $4.0 \times 10^{-35}$ | 0.043  | 0.009 | $1.9 \times 10^{-6}$  |
| rs4985155 | A | G | 0.33 | -0.045 | 0.009 | $2.2 \times 10^{-09}$ | 0.005  | 0.009 | 0.55                  |
| rs6426749 | G | C | 0.17 | -0.105 | 0.011 | $1.9 \times 10^{-44}$ | 0.052  | 0.011 | 0.00                  |
| rs6532023 | G | T | 0.34 | -0.061 | 0.009 | $1.2 \times 10^{-27}$ | 0.012  | 0.009 | 0.18                  |
| rs6959212 | T | C | 0.68 | -0.077 | 0.009 | $3.8 \times 10^{-38}$ | 0.039  | 0.009 | $6.4 \times 10^{-6}$  |
| rs7071206 | T | C | 0.22 | -0.074 | 0.011 | $5.0 \times 10^{-19}$ | -0.002 | 0.010 | 0.86                  |

|           |   |   |      |        |       |                       |       |       |                      |
|-----------|---|---|------|--------|-------|-----------------------|-------|-------|----------------------|
| rs7932354 | C | T | 0.31 | -0.041 | 0.009 | $5.5 \times 10^{-12}$ | 0.029 | 0.009 | 0.001                |
| rs884205  | A | C | 0.73 | -0.065 | 0.011 | $1.6 \times 10^{-17}$ | 0.007 | 0.010 | 0.49                 |
| rs9466056 | A | G | 0.62 | -0.036 | 0.009 | $3.6 \times 10^{-08}$ | 0.020 | 0.008 | 0.02                 |
| rs9533090 | T | C | 0.51 | -0.110 | 0.009 | $4.8 \times 10^{-68}$ | 0.028 | 0.008 | $7.5 \times 10^{-4}$ |
| rs9921222 | T | C | 0.52 | -0.049 | 0.009 | $1.0 \times 10^{-16}$ | 0.021 | 0.008 | 0.01                 |

#### Rheumatoid Arthritis

|            |   |   |      |       |       |                        |        |       |      |
|------------|---|---|------|-------|-------|------------------------|--------|-------|------|
| rs10175798 | A | G | 0.38 | 0.068 | 0.037 | $4.2 \times 10^{-8}$   | -0.005 | 0.008 | 0.59 |
| rs10985070 | C | A | 0.47 | 0.068 | 0.037 | $4.2 \times 10^{-9}$   | 0.007  | 0.008 | 0.38 |
| rs11574914 | A | G | 0.35 | 0.113 | 0.039 | $1.8 \times 10^{-15}$  | -0.001 | 0.009 | 0.95 |
| rs11889341 | T | C | 0.21 | 0.086 | 0.040 | $1.4 \times 10^{-12}$  | 0.001  | 0.010 | 0.92 |
| rs1516971  | T | C | 0.18 | 0.307 | 0.060 | $3.2 \times 10^{-11}$  | -0.016 | 0.012 | 0.18 |
| rs1571878  | C | T | 0.41 | 0.148 | 0.038 | $2.4 \times 10^{-18}$  | 0.015  | 0.008 | 0.06 |
| rs17264332 | G | A | 0.18 | 0.113 | 0.048 | $4.1 \times 10^{-20}$  | 0.001  | 0.010 | 0.92 |
| rs1858037  | T | A | 0.38 | 0.030 | 0.038 | $2.0 \times 10^{-09}$  | 0.021  | 0.009 | 0.02 |
| rs1980422  | C | T | 0.24 | 0.148 | 0.046 | $1.9 \times 10^{-13}$  | 0.001  | 0.010 | 0.93 |
| rs2451258  | T | C | 0.43 | 0.068 | 0.041 | $1.6 \times 10^{-10}$  | -0.004 | 0.009 | 0.65 |
| rs2476601  | A | G | 0.14 | 0.542 | 0.053 | $8.9 \times 10^{-170}$ | -0.018 | 0.013 | 0.18 |
| rs2561477  | G | A | 0.38 | 0.104 | 0.040 | $2.2 \times 10^{-11}$  | 0.016  | 0.009 | 0.08 |
| rs3087243  | G | A | 0.46 | 0.122 | 0.039 | $3.6 \times 10^{-22}$  | 0.001  | 0.008 | 0.88 |
| rs3806624  | G | A | 0.50 | 0.058 | 0.037 | $2.8 \times 10^{-8}$   | 0.008  | 0.008 | 0.33 |
| rs4239702  | C | T | 0.26 | 0.148 | 0.042 | $1.1 \times 10^{-16}$  | 0.001  | 0.009 | 0.94 |

|           |   |   |      |       |       |                       |        |       |      |
|-----------|---|---|------|-------|-------|-----------------------|--------|-------|------|
| rs4272    | G | A | 0.25 | 0.113 | 0.048 | 1.2x10 <sup>-8</sup>  | -0.004 | 0.010 | 0.72 |
| rs4409785 | C | T | 0.12 | 0.223 | 0.047 | 3.6x10 <sup>-9</sup>  | -0.004 | 0.011 | 0.73 |
| rs4452313 | T | A | 0.32 | 0.077 | 0.041 | 5.2x10 <sup>-11</sup> | -0.002 | 0.009 | 0.79 |
| rs624988  | T | C | 0.49 | 0.104 | 0.040 | 8.0x10 <sup>-10</sup> | 0.021  | 0.008 | 0.01 |
| rs678347  | G | A | 0.27 | 0.104 | 0.040 | 7.3x10 <sup>-9</sup>  | 0.001  | 0.009 | 0.91 |
| rs706778  | T | C | 0.45 | 0.148 | 0.038 | 4.6x10 <sup>-15</sup> | 0.007  | 0.008 | 0.39 |
| rs7752903 | G | T | 0.03 | 0.399 | 0.108 | 1.7x10 <sup>-20</sup> | 0.055  | 0.024 | 0.02 |
| rs8026898 | A | G | 0.25 | 0.086 | 0.040 | 5.9x10 <sup>-18</sup> | 0.013  | 0.009 | 0.15 |
| rs8032939 | C | T | 0.35 | 0.122 | 0.043 | 3.2x10 <sup>-14</sup> | -0.001 | 0.010 | 0.95 |
| rs909685  | A | T | 0.36 | 0.113 | 0.039 | 6.4x10 <sup>-12</sup> | 0.016  | 0.009 | 0.09 |
| rs9372120 | G | T | 0.24 | 0.182 | 0.045 | 3.8x10 <sup>-8</sup>  | -0.013 | 0.010 | 0.20 |
| rs947474  | A | G | 0.16 | 0.095 | 0.049 | 3.3x10 <sup>-10</sup> | 0.003  | 0.011 | 0.76 |
| rs9653442 | C | T | 0.43 | 0.131 | 0.039 | 9.8x10 <sup>-15</sup> | 0.012  | 0.008 | 0.14 |
| rs968567  | C | T | 0.18 | 0.148 | 0.050 | 1.8x10 <sup>-8</sup>  | 0.018  | 0.011 | 0.09 |
| rs998731  | T | C | 0.46 | 0.095 | 0.040 | 6.6x10 <sup>-9</sup>  | 0.002  | 0.008 | 0.86 |

Coronary Heart Disease

|            |   |   |      |       |       |                       |        |       |      |
|------------|---|---|------|-------|-------|-----------------------|--------|-------|------|
| rs10947789 | T | C | 0.76 | 0.060 | 0.010 | 1.6x10 <sup>-8</sup>  | -0.017 | 0.010 | 0.08 |
| rs1122608  | G | T | 0.76 | 0.092 | 0.034 | 6.3x10 <sup>-14</sup> | -0.017 | 0.009 | 0.08 |
| rs11556924 | C | T | 0.64 | 0.083 | 0.010 | 6.8x10 <sup>-17</sup> | -0.009 | 0.009 | 0.31 |
| rs12190287 | C | G | 0.61 | 0.072 | 0.030 | 4.9x10 <sup>-13</sup> | 0.012  | 0.009 | 0.16 |
| rs12936587 | G | A | 0.58 | 0.055 | 0.009 | 1.2x10 <sup>-9</sup>  | 0.009  | 0.008 | 0.26 |

|            |   |   |      |       |       |                       |        |       |      |
|------------|---|---|------|-------|-------|-----------------------|--------|-------|------|
| rs1561198  | T | C | 0.45 | 0.052 | 0.009 | 4.5x10 <sup>-9</sup>  | -0.007 | 0.008 | 0.37 |
| rs17114036 | A | G | 0.91 | 0.106 | 0.016 | 5.8x10 <sup>-12</sup> | -0.014 | 0.014 | 0.33 |
| rs17514846 | A | C | 0.44 | 0.058 | 0.009 | 4.5x10 <sup>-10</sup> | 0.005  | 0.008 | 0.51 |
| rs2047009  | G | T | 0.50 | 0.053 | 0.009 | 1.6x10 <sup>-9</sup>  | 0.003  | 0.008 | 0.73 |
| rs2048327  | C | T | 0.37 | 0.060 | 0.009 | 6.9x10 <sup>-11</sup> | -0.003 | 0.008 | 0.73 |
| rs2075650  | G | A | 0.14 | 0.104 | 0.016 | 8.6x10 <sup>-12</sup> | 0.004  | 0.012 | 0.73 |
| rs2252641  | C | T | 0.45 | 0.048 | 0.009 | 3.7x10 <sup>-8</sup>  | 0.004  | 0.008 | 0.61 |
| rs2281727  | G | A | 0.36 | 0.050 | 0.009 | 7.8x10 <sup>-9</sup>  | -0.005 | 0.009 | 0.57 |
| rs2505083  | C | T | 0.42 | 0.061 | 0.009 | 1.4x10 <sup>-11</sup> | 0.000  | 0.008 | 0.96 |
| rs264      | G | A | 0.85 | 0.071 | 0.012 | 5.1x10 <sup>-9</sup>  | -0.012 | 0.012 | 0.30 |
| rs273909   | G | A | 0.13 | 0.077 | 0.013 | 1.4x10 <sup>-8</sup>  | -0.030 | 0.013 | 0.02 |
| rs2895811  | C | T | 0.43 | 0.056 | 0.009 | 4.1x10 <sup>-10</sup> | -0.008 | 0.008 | 0.36 |
| rs2954029  | A | T | 0.54 | 0.048 | 0.009 | 4.5x10 <sup>-8</sup>  | -0.011 | 0.008 | 0.20 |
| rs3184504  | T | C | 0.42 | 0.068 | 0.010 | 5.4x10 <sup>-11</sup> | 0.020  | 0.008 | 0.01 |
| rs3217992  | T | C | 0.38 | 0.145 | 0.009 | 7.8x10 <sup>-57</sup> | -0.008 | 0.009 | 0.32 |
| rs4252120  | T | C | 0.72 | 0.062 | 0.010 | 5.0x10 <sup>-9</sup>  | 0.006  | 0.009 | 0.51 |
| rs445925   | C | T | 0.90 | 0.122 | 0.021 | 8.8x10 <sup>-9</sup>  | -0.001 | 0.014 | 0.92 |
| rs4773144  | G | A | 0.43 | 0.068 | 0.010 | 1.4x10 <sup>-11</sup> | 0.008  | 0.009 | 0.37 |
| rs4845625  | T | C | 0.44 | 0.049 | 0.009 | 3.6x10 <sup>-8</sup>  | 0.011  | 0.008 | 0.19 |
| rs501120   | T | C | 0.84 | 0.067 | 0.012 | 1.8x10 <sup>-8</sup>  | 0.016  | 0.012 | 0.18 |
| rs515135   | C | T | 0.83 | 0.075 | 0.012 | 4.8x10 <sup>-10</sup> | 0.021  | 0.011 | 0.05 |

|           |   |   |      |       |       |                       |        |       |      |
|-----------|---|---|------|-------|-------|-----------------------|--------|-------|------|
| rs579459  | C | T | 0.21 | 0.071 | 0.013 | $2.7 \times 10^{-8}$  | 0.011  | 0.010 | 0.26 |
| rs602633  | G | T | 0.78 | 0.116 | 0.011 | $1.5 \times 10^{-25}$ | 0.016  | 0.010 | 0.11 |
| rs6544713 | T | C | 0.29 | 0.061 | 0.010 | $8.7 \times 10^{-10}$ | 0.006  | 0.009 | 0.50 |
| rs6725887 | C | T | 0.13 | 0.111 | 0.014 | $1.2 \times 10^{-15}$ | -0.009 | 0.012 | 0.46 |
| rs7173743 | T | C | 0.57 | 0.065 | 0.009 | $6.8 \times 10^{-13}$ | 0.007  | 0.008 | 0.38 |
| rs7692387 | G | A | 0.80 | 0.065 | 0.011 | $4.6 \times 10^{-9}$  | -0.014 | 0.010 | 0.19 |
| rs9319428 | A | G | 0.32 | 0.055 | 0.009 | $1.0 \times 10^{-8}$  | -0.011 | 0.009 | 0.20 |
| rs9369640 | A | C | 0.65 | 0.088 | 0.009 | $7.5 \times 10^{-22}$ | 0.003  | 0.008 | 0.74 |
| rs9515203 | T | C | 0.73 | 0.079 | 0.011 | $5.9 \times 10^{-12}$ | -0.002 | 0.010 | 0.88 |
| rs974819  | T | C | 0.29 | 0.065 | 0.010 | $3.6 \times 10^{-11}$ | -0.002 | 0.009 | 0.87 |
| rs9818870 | T | C | 0.15 | 0.070 | 0.012 | $2.6 \times 10^{-9}$  | 0.013  | 0.011 | 0.24 |
| rs9982601 | T | C | 0.14 | 0.119 | 0.014 | $7.7 \times 10^{-17}$ | 0.007  | 0.012 | 0.58 |

#### Age at Menarche

|            |   |   |      |       |       |                       |        |       |      |
|------------|---|---|------|-------|-------|-----------------------|--------|-------|------|
| rs10144321 | A | G | 0.75 | 0.040 | 0.006 | $9.0 \times 10^{-15}$ | 0.007  | 0.010 | 0.48 |
| rs1038903  | T | C | 0.73 | 0.040 | 0.006 | $2.0 \times 10^{-11}$ | -0.007 | 0.009 | 0.47 |
| rs10423674 | A | C | 0.34 | 0.040 | 0.005 | $9.2 \times 10^{-12}$ | -0.019 | 0.009 | 0.03 |
| rs10453225 | G | T | 0.68 | 0.090 | 0.005 | $5.8 \times 10^{-66}$ | 0.003  | 0.009 | 0.73 |
| rs10789181 | A | G | 0.39 | 0.030 | 0.005 | $3.5 \times 10^{-8}$  | 0.004  | 0.008 | 0.66 |
| rs1079866  | G | C | 0.15 | 0.070 | 0.007 | $9.3 \times 10^{-24}$ | -0.002 | 0.012 | 0.85 |
| rs10895140 | G | A | 0.66 | 0.040 | 0.005 | $6.7 \times 10^{-14}$ | -0.001 | 0.009 | 0.88 |

|            |   |   |      |       |       |                       |        |       |       |
|------------|---|---|------|-------|-------|-----------------------|--------|-------|-------|
| rs10938397 | A | G | 0.57 | 0.040 | 0.005 | $4.0 \times 10^{-13}$ | 0.014  | 0.008 | 0.11  |
| rs10980921 | C | T | 0.09 | 0.090 | 0.009 | $1.7 \times 10^{-23}$ | -0.003 | 0.015 | 0.86  |
| rs11022756 | A | C | 0.29 | 0.050 | 0.006 | $7.4 \times 10^{-20}$ | -0.015 | 0.009 | 0.09  |
| rs11165924 | A | G | 0.69 | 0.030 | 0.006 | $2.2 \times 10^{-9}$  | 0.006  | 0.009 | 0.51  |
| rs11215400 | C | A | 0.27 | 0.040 | 0.006 | $6.8 \times 10^{-11}$ | -0.010 | 0.009 | 0.26  |
| rs1129700  | T | C | 0.44 | 0.030 | 0.005 | $2.3 \times 10^{-9}$  | -0.009 | 0.008 | 0.31  |
| rs11578152 | G | A | 0.44 | 0.030 | 0.005 | $4.5 \times 10^{-8}$  | -0.002 | 0.008 | 0.80  |
| rs11715566 | T | C | 0.50 | 0.050 | 0.005 | $2.4 \times 10^{-27}$ | 0.016  | 0.008 | 0.04  |
| rs11767400 | A | C | 0.30 | 0.040 | 0.006 | $4.1 \times 10^{-11}$ | 0.013  | 0.009 | 0.14  |
| rs11792861 | A | C | 0.70 | 0.040 | 0.005 | $1.7 \times 10^{-11}$ | 0.014  | 0.009 | 0.13  |
| rs12148769 | G | A | 0.90 | 0.050 | 0.008 | $5.2 \times 10^{-11}$ | 0.011  | 0.014 | 0.43  |
| rs12446632 | A | G | 0.13 | 0.040 | 0.007 | $1.3 \times 10^{-8}$  | 0.010  | 0.012 | 0.41  |
| rs12472911 | C | T | 0.20 | 0.040 | 0.006 | $6.7 \times 10^{-10}$ | -0.005 | 0.010 | 0.60  |
| rs1254337  | T | A | 0.31 | 0.040 | 0.005 | $2.1 \times 10^{-16}$ | 0.001  | 0.009 | 0.87  |
| rs12571664 | T | C | 0.79 | 0.040 | 0.006 | $3.3 \times 10^{-10}$ | -0.007 | 0.010 | 0.50  |
| rs12607903 | C | T | 0.30 | 0.040 | 0.005 | $5.4 \times 10^{-11}$ | -0.005 | 0.009 | 0.60  |
| rs12915845 | C | T | 0.58 | 0.030 | 0.005 | $2.7 \times 10^{-12}$ | 0.008  | 0.008 | 0.36  |
| rs13053505 | G | T | 0.80 | 0.040 | 0.007 | $3.0 \times 10^{-8}$  | -0.010 | 0.011 | 0.36  |
| rs13067731 | T | C | 0.16 | 0.040 | 0.007 | $1.0 \times 10^{-9}$  | 0.031  | 0.011 | 0.004 |
| rs13135934 | C | G | 0.40 | 0.030 | 0.005 | $1.1 \times 10^{-10}$ | -0.004 | 0.009 | 0.64  |
| rs13179411 | T | G | 0.17 | 0.060 | 0.007 | $3.4 \times 10^{-20}$ | -0.022 | 0.011 | 0.05  |



|            |   |   |      |       |       |                       |        |       |      |
|------------|---|---|------|-------|-------|-----------------------|--------|-------|------|
| rs1324913  | G | T | 0.65 | 0.030 | 0.005 | $3.1 \times 10^{-10}$ | 0.010  | 0.009 | 0.24 |
| rs1364063  | C | T | 0.43 | 0.050 | 0.005 | $6.2 \times 10^{-21}$ | -0.009 | 0.008 | 0.30 |
| rs1400974  | A | G | 0.64 | 0.050 | 0.005 | $8.3 \times 10^{-20}$ | 0.009  | 0.009 | 0.29 |
| rs1461503  | C | A | 0.57 | 0.050 | 0.005 | $2.7 \times 10^{-26}$ | -0.002 | 0.008 | 0.82 |
| rs1469039  | A | G | 0.19 | 0.050 | 0.007 | $3.5 \times 10^{-12}$ | 0.004  | 0.011 | 0.71 |
| rs1532331  | G | T | 0.32 | 0.030 | 0.005 | $3.5 \times 10^{-9}$  | 0.009  | 0.009 | 0.31 |
| rs16860328 | G | A | 0.42 | 0.040 | 0.005 | $1.4 \times 10^{-16}$ | 0.009  | 0.008 | 0.28 |
| rs16896742 | G | A | 0.38 | 0.040 | 0.006 | $3.2 \times 10^{-10}$ | 0.003  | 0.009 | 0.72 |
| rs16918254 | A | G | 0.92 | 0.050 | 0.009 | $1.4 \times 10^{-8}$  | 0.011  | 0.016 | 0.49 |
| rs16918636 | T | C | 0.79 | 0.030 | 0.006 | $3.2 \times 10^{-8}$  | -0.013 | 0.010 | 0.19 |
| rs17086188 | A | G | 0.94 | 0.070 | 0.013 | $3.6 \times 10^{-8}$  | -0.009 | 0.024 | 0.72 |
| rs17171818 | C | T | 0.77 | 0.040 | 0.006 | $8.9 \times 10^{-14}$ | -0.005 | 0.010 | 0.63 |
| rs1874984  | C | G | 0.47 | 0.040 | 0.005 | $1.9 \times 10^{-12}$ | -0.003 | 0.008 | 0.72 |
| rs1915146  | G | A | 0.40 | 0.030 | 0.005 | $3.7 \times 10^{-8}$  | 0.006  | 0.008 | 0.48 |
| rs1958560  | A | G | 0.59 | 0.030 | 0.005 | $3.7 \times 10^{-8}$  | 0.013  | 0.008 | 0.13 |
| rs2063730  | C | A | 0.18 | 0.050 | 0.007 | $2.3 \times 10^{-12}$ | 0.019  | 0.011 | 0.07 |
| rs2137289  | A | G | 0.59 | 0.050 | 0.005 | $8.2 \times 10^{-20}$ | 0.001  | 0.009 | 0.90 |
| rs2274465  | C | G | 0.66 | 0.030 | 0.005 | $1.7 \times 10^{-9}$  | 0.004  | 0.009 | 0.67 |
| rs244293   | G | A | 0.60 | 0.030 | 0.005 | $4.2 \times 10^{-11}$ | 0.010  | 0.008 | 0.24 |
| rs246185   | C | T | 0.33 | 0.040 | 0.006 | $6.8 \times 10^{-16}$ | -0.007 | 0.009 | 0.42 |
| rs2479724  | T | C | 0.45 | 0.030 | 0.005 | $1.2 \times 10^{-12}$ | -0.005 | 0.008 | 0.54 |

|           |   |   |      |       |       |                       |        |       |      |
|-----------|---|---|------|-------|-------|-----------------------|--------|-------|------|
| rs251130  | G | A | 0.73 | 0.040 | 0.006 | $2.8 \times 10^{-10}$ | 0.020  | 0.009 | 0.03 |
| rs2600959 | A | G | 0.34 | 0.040 | 0.005 | $4.1 \times 10^{-11}$ | -0.002 | 0.009 | 0.85 |
| rs268067  | A | G | 0.80 | 0.040 | 0.006 | $3.3 \times 10^{-8}$  | 0.003  | 0.011 | 0.75 |
| rs2687729 | G | A | 0.27 | 0.040 | 0.006 | $1.0 \times 10^{-10}$ | 0.011  | 0.009 | 0.22 |
| rs2836950 | C | G | 0.64 | 0.030 | 0.005 | $6.2 \times 10^{-11}$ | 0.023  | 0.009 | 0.01 |
| rs2947411 | A | G | 0.17 | 0.060 | 0.007 | $1.8 \times 10^{-19}$ | 0.004  | 0.011 | 0.73 |
| rs3101336 | T | C | 0.40 | 0.040 | 0.005 | $5.2 \times 10^{-13}$ | -0.010 | 0.008 | 0.21 |
| rs3733631 | C | G | 0.15 | 0.050 | 0.007 | $4.8 \times 10^{-13}$ | 0.013  | 0.011 | 0.25 |
| rs3743266 | T | C | 0.68 | 0.040 | 0.005 | $2.4 \times 10^{-13}$ | -0.003 | 0.009 | 0.75 |
| rs4369815 | T | G | 0.93 | 0.060 | 0.010 | $1.5 \times 10^{-10}$ | -0.007 | 0.016 | 0.68 |
| rs466639  | C | T | 0.87 | 0.080 | 0.007 | $2.4 \times 10^{-24}$ | 0.015  | 0.012 | 0.23 |
| rs4756059 | T | C | 0.92 | 0.070 | 0.010 | $4.5 \times 10^{-13}$ | 0.012  | 0.016 | 0.43 |
| rs4875053 | G | C | 0.44 | 0.030 | 0.006 | $1.3 \times 10^{-8}$  | -0.004 | 0.009 | 0.64 |
| rs4895808 | C | T | 0.54 | 0.030 | 0.005 | $4.8 \times 10^{-13}$ | -0.016 | 0.008 | 0.05 |
| rs4929947 | G | C | 0.36 | 0.040 | 0.005 | $2.6 \times 10^{-12}$ | 0.018  | 0.009 | 0.03 |
| rs543874  | A | G | 0.80 | 0.050 | 0.006 | $1.4 \times 10^{-15}$ | 0.010  | 0.010 | 0.32 |
| rs6009583 | C | T | 0.74 | 0.030 | 0.006 | $4.6 \times 10^{-8}$  | 0.021  | 0.009 | 0.03 |
| rs6427782 | A | G | 0.51 | 0.030 | 0.005 | $4.6 \times 10^{-8}$  | -0.008 | 0.008 | 0.33 |
| rs652260  | T | C | 0.54 | 0.030 | 0.005 | $9.9 \times 10^{-09}$ | 0.005  | 0.008 | 0.53 |
| rs6555855 | G | A | 0.23 | 0.040 | 0.006 | $2.4 \times 10^{-09}$ | -0.013 | 0.010 | 0.21 |

|           |   |   |      |       |       |                        |        |       |      |
|-----------|---|---|------|-------|-------|------------------------|--------|-------|------|
| rs6563739 | G | T | 0.34 | 0.030 | 0.005 | $2.3 \times 10^{-11}$  | 0.009  | 0.009 | 0.32 |
| rs6747380 | A | G | 0.17 | 0.070 | 0.007 | $5.6 \times 10^{-28}$  | -0.013 | 0.011 | 0.24 |
| rs6758290 | T | C | 0.50 | 0.040 | 0.005 | $6.6 \times 10^{-13}$  | 0.002  | 0.008 | 0.81 |
| rs6770162 | A | G | 0.51 | 0.040 | 0.005 | $1.5 \times 10^{-12}$  | 0.009  | 0.008 | 0.25 |
| rs6933660 | C | A | 0.69 | 0.030 | 0.005 | $1.3 \times 10^{-9}$   | -0.004 | 0.009 | 0.66 |
| rs6938574 | T | C | 0.16 | 0.040 | 0.007 | $2.4 \times 10^{-9}$   | -0.002 | 0.012 | 0.86 |
| rs6964833 | T | C | 0.75 | 0.040 | 0.006 | $5.3 \times 10^{-12}$  | 0.001  | 0.009 | 0.95 |
| rs7103411 | C | T | 0.21 | 0.040 | 0.006 | $2.6 \times 10^{-11}$  | 0.003  | 0.010 | 0.79 |
| rs7104764 | G | A | 0.25 | 0.030 | 0.006 | $3.7 \times 10^{-8}$   | 0.012  | 0.009 | 0.19 |
| rs7138803 | G | A | 0.62 | 0.040 | 0.005 | $1.7 \times 10^{-12}$  | 0.018  | 0.008 | 0.03 |
| rs7215990 | G | A | 0.76 | 0.040 | 0.006 | $1.9 \times 10^{-8}$   | -0.016 | 0.010 | 0.10 |
| rs7514705 | C | T | 0.56 | 0.040 | 0.005 | $1.8 \times 10^{-16}$  | -0.001 | 0.008 | 0.90 |
| rs7642134 | G | A | 0.61 | 0.040 | 0.005 | $3.0 \times 10^{-16}$  | 0.003  | 0.008 | 0.68 |
| rs7647973 | A | G | 0.26 | 0.050 | 0.006 | $1.3 \times 10^{-16}$  | 0.004  | 0.009 | 0.68 |
| rs7701886 | A | G | 0.58 | 0.030 | 0.005 | $4.5 \times 10^{-8}$   | 0.011  | 0.008 | 0.17 |
| rs7759938 | C | T | 0.32 | 0.120 | 0.005 | $7.8 \times 10^{-110}$ | -0.011 | 0.009 | 0.23 |
| rs7821178 | C | A | 0.65 | 0.040 | 0.005 | $7.3 \times 10^{-17}$  | 0.006  | 0.009 | 0.53 |
| rs7828501 | G | A | 0.45 | 0.040 | 0.005 | $1.2 \times 10^{-13}$  | 0.001  | 0.008 | 0.91 |
| rs7853970 | T | C | 0.47 | 0.030 | 0.005 | $2.3 \times 10^{-9}$   | 0.003  | 0.008 | 0.75 |
| rs7865468 | A | G | 0.70 | 0.030 | 0.005 | $1.3 \times 10^{-7}$   | 0.011  | 0.009 | 0.21 |
| rs7955374 | T | C | 0.13 | 0.040 | 0.008 | $9.5 \times 10^{-9}$   | -0.013 | 0.013 | 0.30 |

|           |   |   |      |       |       |                       |        |       |       |
|-----------|---|---|------|-------|-------|-----------------------|--------|-------|-------|
| rs8032675 | T | C | 0.40 | 0.040 | 0.005 | $2.1 \times 10^{-13}$ | -0.013 | 0.008 | 0.11  |
| rs8050136 | C | A | 0.60 | 0.040 | 0.005 | $1.7 \times 10^{-17}$ | 0.027  | 0.008 | 0.00  |
| rs852069  | G | A | 0.64 | 0.040 | 0.005 | $1.2 \times 10^{-13}$ | -0.006 | 0.009 | 0.48  |
| rs889122  | G | T | 0.72 | 0.040 | 0.006 | $1.6 \times 10^{-13}$ | -0.009 | 0.009 | 0.35  |
| rs900400  | T | C | 0.61 | 0.030 | 0.005 | $2.3 \times 10^{-11}$ | -0.016 | 0.009 | 0.08  |
| rs913588  | G | A | 0.49 | 0.030 | 0.005 | $5.8 \times 10^{-11}$ | -0.002 | 0.008 | 0.82  |
| rs9321659 | A | G | 0.13 | 0.060 | 0.008 | $2.5 \times 10^{-16}$ | 0.038  | 0.012 | 0.002 |
| rs939317  | G | A | 0.74 | 0.040 | 0.006 | $3.0 \times 10^{-12}$ | -0.005 | 0.009 | 0.59  |
| rs9447700 | C | T | 0.69 | 0.030 | 0.005 | $5.6 \times 10^{-9}$  | 0.000  | 0.009 | 1.00  |
| rs9475752 | C | T | 0.81 | 0.040 | 0.006 | $8.3 \times 10^{-12}$ | 0.001  | 0.011 | 0.92  |
| rs951366  | T | C | 0.60 | 0.030 | 0.005 | $1.7 \times 10^{-8}$  | -0.002 | 0.008 | 0.80  |
| rs9560113 | G | A | 0.28 | 0.050 | 0.006 | $2.1 \times 10^{-17}$ | 0.016  | 0.009 | 0.07  |
| rs9635759 | A | G | 0.32 | 0.050 | 0.005 | $1.7 \times 10^{-24}$ | 0.003  | 0.009 | 0.71  |
| rs9647570 | G | T | 0.14 | 0.050 | 0.007 | $1.4 \times 10^{-11}$ | 0.011  | 0.012 | 0.36  |
| rs9849248 | C | T | 0.15 | 0.040 | 0.007 | $1.9 \times 10^{-8}$  | -0.015 | 0.011 | 0.19  |
| rs988913  | C | T | 0.66 | 0.040 | 0.005 | $1.4 \times 10^{-12}$ | 0.007  | 0.009 | 0.43  |

Age at Menopause

|            |   |   |      |        |       |                       |        |       |      |
|------------|---|---|------|--------|-------|-----------------------|--------|-------|------|
| rs1046089  | A | G | 0.65 | -0.223 | 0.024 | $3.7 \times 10^{-21}$ | 0.010  | 0.016 | 0.51 |
| rs1054875  | T | A | 0.40 | -0.188 | 0.021 | $1.7 \times 10^{-19}$ | -0.020 | 0.015 | 0.20 |
| rs10734411 | A | G | 0.53 | -0.122 | 0.021 | $2.6 \times 10^{-9}$  | 0.017  | 0.015 | 0.29 |

|            |   |   |      |        |       |                       |        |       |      |
|------------|---|---|------|--------|-------|-----------------------|--------|-------|------|
| rs10852344 | T | C | 0.41 | -0.165 | 0.021 | 1.3x10 <sup>-15</sup> | 0.019  | 0.015 | 0.22 |
| rs10905065 | A | G | 0.39 | -0.113 | 0.021 | 3.9x10 <sup>-8</sup>  | -0.007 | 0.015 | 0.67 |
| rs10957156 | A | G | 0.24 | -0.139 | 0.024 | 4.5x10 <sup>-9</sup>  | 0.005  | 0.018 | 0.79 |
| rs11031006 | G | A | 0.85 | -0.217 | 0.029 | 8.5x10 <sup>-14</sup> | 0.034  | 0.022 | 0.12 |
| rs11668344 | G | A | 0.36 | -0.412 | 0.021 | 5.5x10 <sup>-85</sup> | 0.021  | 0.016 | 0.19 |
| rs11738223 | A | G | 0.32 | -0.123 | 0.022 | 2.0x10 <sup>-8</sup>  | 0.001  | 0.017 | 0.94 |
| rs12142240 | T | C | 0.32 | -0.127 | 0.022 | 6.6x10 <sup>-9</sup>  | 0.009  | 0.016 | 0.58 |
| rs12196873 | A | C | 0.15 | -0.162 | 0.029 | 2.8x10 <sup>-08</sup> | -0.010 | 0.022 | 0.65 |
| rs12214825 | T | C | 0.71 | -0.167 | 0.023 | 3.2x10 <sup>-13</sup> | 0.012  | 0.017 | 0.50 |
| rs12371165 | C | T | 0.86 | -0.182 | 0.030 | 7.0x10 <sup>-10</sup> | 0.011  | 0.022 | 0.62 |
| rs12461110 | A | G | 0.65 | -0.174 | 0.022 | 7.6x10 <sup>-16</sup> | 0.003  | 0.016 | 0.83 |
| rs12465115 | T | G | 0.62 | -0.194 | 0.028 | 4.7x10 <sup>-12</sup> | 0.010  | 0.015 | 0.53 |
| rs12599106 | A | T | 0.49 | -0.116 | 0.021 | 3.1x10 <sup>-8</sup>  | 0.005  | 0.016 | 0.78 |
| rs12824058 | G | A | 0.43 | -0.136 | 0.021 | 6.1x10 <sup>-11</sup> | 0.011  | 0.015 | 0.47 |
| rs13040088 | G | A | 0.21 | -0.158 | 0.025 | 2.5x10 <sup>-10</sup> | 0.001  | 0.018 | 0.98 |
| rs1411478  | A | G | 0.59 | -0.132 | 0.021 | 1.4x10 <sup>-10</sup> | 0.042  | 0.015 | 0.01 |
| rs16858210 | G | A | 0.75 | -0.141 | 0.024 | 3.1x10 <sup>-9</sup>  | 0.008  | 0.018 | 0.66 |
| rs16991615 | G | A | 0.93 | -0.875 | 0.044 | 1.6x10 <sup>-89</sup> | 0.000  | 0.032 | 0.99 |
| rs1713460  | G | A | 0.30 | -0.144 | 0.023 | 2.4x10 <sup>-10</sup> | 0.003  | 0.017 | 0.88 |
| rs1727326  | C | G | 0.85 | -0.195 | 0.032 | 1.7x10 <sup>-9</sup>  | 0.007  | 0.024 | 0.76 |
| rs1799949  | G | A | 0.68 | -0.139 | 0.021 | 8.4x10 <sup>-11</sup> | 0.001  | 0.016 | 0.97 |

|           |   |   |      |        |       |                       |        |       |      |
|-----------|---|---|------|--------|-------|-----------------------|--------|-------|------|
| rs1800932 | A | G | 0.19 | -0.173 | 0.026 | $3.2 \times 10^{-11}$ | 0.018  | 0.019 | 0.35 |
| rs2236553 | C | T | 0.24 | -0.157 | 0.025 | $6.1 \times 10^{-10}$ | 0.005  | 0.019 | 0.78 |
| rs2236918 | C | G | 0.55 | -0.153 | 0.021 | $8.3 \times 10^{-14}$ | 0.013  | 0.015 | 0.42 |
| rs2241584 | A | G | 0.62 | -0.139 | 0.021 | $1.5 \times 10^{-11}$ | -0.002 | 0.015 | 0.90 |
| rs2277339 | G | T | 0.10 | -0.312 | 0.035 | $1.8 \times 10^{-19}$ | 0.001  | 0.025 | 0.97 |
| rs236189  | G | A | 0.16 | -0.177 | 0.028 | $4.4 \times 10^{-10}$ | -0.022 | 0.021 | 0.29 |
| rs2547274 | G | C | 0.91 | -0.277 | 0.038 | $3.4 \times 10^{-13}$ | 0.007  | 0.029 | 0.82 |
| rs2720044 | A | C | 0.16 | -0.290 | 0.030 | $7.3 \times 10^{-22}$ | 0.016  | 0.024 | 0.51 |
| rs2941505 | A | G | 0.68 | -0.130 | 0.022 | $1.9 \times 10^{-09}$ | 0.020  | 0.016 | 0.22 |
| rs349306  | G | A | 0.13 | -0.227 | 0.036 | $1.7 \times 10^{-10}$ | 0.020  | 0.030 | 0.52 |
| rs365132  | G | T | 0.51 | -0.242 | 0.020 | $1.4 \times 10^{-33}$ | 0.022  | 0.015 | 0.16 |
| rs4246511 | C | T | 0.71 | -0.218 | 0.023 | $5.1 \times 10^{-21}$ | -0.017 | 0.018 | 0.33 |
| rs427394  | G | A | 0.41 | -0.126 | 0.022 | $3.8 \times 10^{-9}$  | 0.018  | 0.015 | 0.24 |
| rs4693089 | A | G | 0.49 | -0.202 | 0.021 | $9.2 \times 10^{-23}$ | 0.004  | 0.016 | 0.80 |
| rs4879656 | A | C | 0.63 | -0.119 | 0.021 | $2.0 \times 10^{-8}$  | 0.005  | 0.016 | 0.78 |
| rs4886238 | G | A | 0.66 | -0.177 | 0.022 | $2.5 \times 10^{-16}$ | -0.010 | 0.016 | 0.55 |
| rs551087  | G | A | 0.29 | -0.125 | 0.023 | $3.9 \times 10^{-8}$  | 0.032  | 0.017 | 0.07 |
| rs5762534 | T | C | 0.16 | -0.164 | 0.028 | $6.1 \times 10^{-9}$  | 0.012  | 0.021 | 0.57 |
| rs6856693 | A | G | 0.42 | -0.163 | 0.021 | $9.8 \times 10^{-15}$ | -0.006 | 0.015 | 0.71 |
| rs6899676 | A | G | 0.20 | -0.229 | 0.025 | $2.2 \times 10^{-19}$ | -0.011 | 0.019 | 0.58 |
| rs704795  | A | G | 0.60 | -0.163 | 0.021 | $2.1 \times 10^{-15}$ | 0.000  | 0.015 | 0.97 |

|           |   |   |      |        |       |                       |        |       |      |
|-----------|---|---|------|--------|-------|-----------------------|--------|-------|------|
| rs7259376 | A | G | 0.54 | -0.111 | 0.020 | 4.2x10 <sup>-8</sup>  | 0.027  | 0.015 | 0.08 |
| rs7573003 | A | T | 0.70 | -0.122 | 0.022 | 3.9x10 <sup>-8</sup>  | 0.017  | 0.017 | 0.30 |
| rs763121  | G | A | 0.36 | -0.165 | 0.022 | 2.3x10 <sup>-13</sup> | 0.023  | 0.016 | 0.16 |
| rs7963072 | G | A | 0.82 | -0.162 | 0.027 | 2.1x10 <sup>-9</sup>  | -0.021 | 0.019 | 0.29 |
| rs8070740 | A | G | 0.24 | -0.147 | 0.024 | 1.5x10 <sup>-9</sup>  | 0.015  | 0.018 | 0.42 |
| rs9039    | C | T | 0.28 | -0.125 | 0.023 | 3.3x10 <sup>-8</sup>  | 0.007  | 0.017 | 0.66 |
| rs930036  | A | G | 0.63 | -0.185 | 0.021 | 3.1x10 <sup>-19</sup> | 0.008  | 0.015 | 0.59 |
| rs9379881 | T | C | 0.50 | -0.136 | 0.020 | 2.3x10 <sup>-11</sup> | 0.004  | 0.015 | 0.81 |
| rs9796    | T | A | 0.46 | -0.131 | 0.020 | 1.3x10 <sup>-10</sup> | 0.009  | 0.015 | 0.54 |

#### Vitamin D

|            |   |   |      |        |       |                        |        |       |      |
|------------|---|---|------|--------|-------|------------------------|--------|-------|------|
| rs10741657 | G | A | 0.63 | -0.052 | 0.012 | 3.3x10 <sup>-20</sup>  | -0.013 | 0.008 | 0.12 |
| rs12785878 | G | T | 0.73 | -0.056 | 0.013 | 2.1x10 <sup>-27</sup>  | -0.011 | 0.010 | 0.27 |
| rs2282679  | G | T | 0.71 | -0.047 | 0.013 | 1.9x10 <sup>-109</sup> | -0.004 | 0.009 | 0.65 |
| rs6013897  | A | T | 0.80 | -0.027 | 0.015 | 6.0x10 <sup>-10</sup>  | 0.001  | 0.010 | 0.90 |

#### Type 2 Diabetes

|            |   |   |      |       |       |                       |       |       |      |
|------------|---|---|------|-------|-------|-----------------------|-------|-------|------|
| rs10203174 | C | T | 0.91 | 0.131 | 0.019 | 9.5x10 <sup>-12</sup> | 0.016 | 0.013 | 0.23 |
| rs10401969 | C | T | 0.09 | 0.122 | 0.021 | 7.0x10 <sup>-09</sup> | 0.034 | 0.016 | 0.04 |
| rs10811661 | T | C | 0.74 | 0.166 | 0.015 | 3.7x10 <sup>-27</sup> | 0.007 | 0.011 | 0.55 |
| rs10830963 | G | C | 0.22 | 0.095 | 0.013 | 5.3x10 <sup>-13</sup> | 0.014 | 0.010 | 0.15 |
| rs10842994 | C | T | 0.83 | 0.095 | 0.015 | 6.1x10 <sup>-10</sup> | 0.001 | 0.010 | 0.90 |
| rs1111875  | C | T | 0.59 | 0.104 | 0.012 | 2.0x10 <sup>-19</sup> | 0.001 | 0.008 | 0.89 |

|            |   |   |      |       |       |                       |        |       |      |
|------------|---|---|------|-------|-------|-----------------------|--------|-------|------|
| rs11651052 | A | G | 0.48 | 0.095 | 0.014 | $2.0 \times 10^{-11}$ | -0.007 | 0.011 | 0.50 |
| rs11717195 | T | C | 0.80 | 0.104 | 0.014 | $6.5 \times 10^{-14}$ | -0.027 | 0.010 | 0.01 |
| rs12571751 | A | G | 0.56 | 0.077 | 0.012 | $1.0 \times 10^{-10}$ | -0.001 | 0.008 | 0.90 |
| rs12899811 | G | A | 0.25 | 0.077 | 0.013 | $6.3 \times 10^{-9}$  | 0.016  | 0.009 | 0.06 |
| rs12970134 | A | G | 0.28 | 0.077 | 0.014 | $1.2 \times 10^{-8}$  | 0.010  | 0.009 | 0.26 |
| rs13389219 | C | T | 0.60 | 0.068 | 0.012 | $1.0 \times 10^{-8}$  | 0.000  | 0.008 | 0.97 |
| rs1359790  | G | A | 0.73 | 0.077 | 0.014 | $1.4 \times 10^{-8}$  | 0.014  | 0.009 | 0.13 |
| rs1496653  | A | G | 0.91 | 0.086 | 0.015 | $3.6 \times 10^{-9}$  | -0.019 | 0.010 | 0.05 |
| rs1552224  | A | C | 0.87 | 0.104 | 0.016 | $1.8 \times 10^{-10}$ | -0.002 | 0.011 | 0.85 |
| rs163184   | G | T | 0.48 | 0.086 | 0.013 | $1.2 \times 10^{-11}$ | -0.018 | 0.008 | 0.03 |
| rs17168486 | T | C | 0.14 | 0.104 | 0.016 | $5.9 \times 10^{-11}$ | 0.001  | 0.011 | 0.93 |
| rs1801282  | C | G | 0.91 | 0.122 | 0.017 | $1.1 \times 10^{-12}$ | -0.012 | 0.012 | 0.34 |
| rs2075423  | G | T | 0.71 | 0.068 | 0.012 | $8.1 \times 10^{-9}$  | -0.002 | 0.009 | 0.81 |
| rs2261181  | T | C | 0.09 | 0.122 | 0.020 | $1.2 \times 10^{-9}$  | 0.013  | 0.014 | 0.35 |
| rs243088   | T | A | 0.45 | 0.068 | 0.012 | $1.8 \times 10^{-8}$  | 0.004  | 0.008 | 0.62 |
| rs2796441  | G | A | 0.62 | 0.068 | 0.012 | $5.4 \times 10^{-9}$  | -0.001 | 0.008 | 0.86 |
| rs2943640  | C | A | 0.66 | 0.095 | 0.013 | $2.7 \times 10^{-14}$ | 0.004  | 0.009 | 0.67 |
| rs3802177  | G | A | 0.72 | 0.131 | 0.014 | $1.3 \times 10^{-21}$ | -0.020 | 0.009 | 0.03 |
| rs4402960  | T | G | 0.28 | 0.122 | 0.012 | $2.4 \times 10^{-23}$ | -0.020 | 0.009 | 0.02 |
| rs4458523  | G | T | 0.67 | 0.095 | 0.012 | $2.0 \times 10^{-15}$ | -0.001 | 0.008 | 0.88 |
| rs459193   | G | A | 0.75 | 0.077 | 0.013 | $6.0 \times 10^{-9}$  | -0.015 | 0.009 | 0.11 |



|           |   |   |      |       |       |                        |        |       |       |
|-----------|---|---|------|-------|-------|------------------------|--------|-------|-------|
| rs516946  | C | T | 0.80 | 0.086 | 0.014 | 2.5x10 <sup>-10</sup>  | -0.013 | 0.010 | 0.19  |
| rs5215    | C | T | 0.43 | 0.068 | 0.011 | 8.5x10 <sup>-10</sup>  | 0.004  | 0.008 | 0.61  |
| rs6795735 | C | T | 0.52 | 0.077 | 0.012 | 7.4x10 <sup>-11</sup>  | -0.009 | 0.008 | 0.27  |
| rs6878122 | G | A | 0.32 | 0.095 | 0.015 | 5.0x10 <sup>-11</sup>  | -0.003 | 0.009 | 0.76  |
| rs7177055 | A | G | 0.71 | 0.077 | 0.013 | 4.6x10 <sup>-9</sup>   | -0.023 | 0.009 | 0.01  |
| rs7202877 | T | G | 0.91 | 0.113 | 0.021 | 3.5x10 <sup>-8</sup>   | 0.003  | 0.014 | 0.85  |
| rs7756992 | G | A | 0.25 | 0.157 | 0.013 | 7.0x10 <sup>-35</sup>  | 0.009  | 0.009 | 0.32  |
| rs7903146 | T | C | 0.31 | 0.329 | 0.013 | 1.2x10 <sup>-139</sup> | 0.018  | 0.009 | 0.04  |
| rs7955901 | C | T | 0.46 | 0.068 | 0.012 | 6.5x10 <sup>-9</sup>   | -0.006 | 0.008 | 0.46  |
| rs849135  | G | A | 0.51 | 0.104 | 0.012 | 3.1x10 <sup>-17</sup>  | -0.002 | 0.008 | 0.78  |
| rs9936385 | C | T | 0.43 | 0.122 | 0.012 | 2.6x10 <sup>-23</sup>  | -0.027 | 0.008 | 0.001 |

Thyroid-Stimulating Hormone

0.0x10+00

|            |   |   |      |        |       |                       |        |       |      |
|------------|---|---|------|--------|-------|-----------------------|--------|-------|------|
| rs10032216 | C | T | 0.22 | -0.087 | 0.011 | 9.3x10 <sup>-16</sup> | 0.005  | 0.010 | 0.63 |
| rs10519227 | A | T | 0.25 | -0.072 | 0.011 | 1.0x10 <sup>-11</sup> | 0.002  | 0.010 | 0.81 |
| rs10799824 | A | G | 0.16 | -0.113 | 0.012 | 0.0x10+00             | 0.019  | 0.011 | 0.09 |
| rs11624776 | A | C | 0.66 | -0.064 | 0.011 | 1.8x10 <sup>-09</sup> | -0.001 | 0.009 | 0.96 |
| rs11755845 | T | C | 0.27 | -0.065 | 0.010 | 1.7x10 <sup>-10</sup> | -0.009 | 0.010 | 0.35 |
| rs13015993 | G | A | 0.26 | -0.078 | 0.010 | 3.2x10 <sup>-15</sup> | 0.011  | 0.009 | 0.22 |
| rs1537424  | T | C | 0.61 | -0.052 | 0.009 | 1.2x10 <sup>-08</sup> | 0.016  | 0.008 | 0.06 |
| rs1571583  | G | A | 0.75 | -0.057 | 0.010 | 2.6x10 <sup>-08</sup> | -0.007 | 0.010 | 0.48 |
| rs17723470 | T | C | 0.28 | -0.065 | 0.010 | 8.8x10 <sup>-11</sup> | 0.000  | 0.009 | 0.98 |

|            |   |   |      |        |       |                       |        |       |                       |
|------------|---|---|------|--------|-------|-----------------------|--------|-------|-----------------------|
| rs17776563 | A | G | 0.32 | -0.060 | 0.010 | 2.9x10 <sup>-10</sup> | 0.005  | 0.009 | 0.61                  |
| rs334699   | A | G | 0.05 | -0.141 | 0.021 | 5.4x10 <sup>-12</sup> | -0.019 | 0.020 | 0.32                  |
| rs3813582  | C | T | 0.33 | -0.082 | 0.010 | 8.5x10 <sup>-18</sup> | -0.030 | 0.009 | 7.1x10 <sup>-04</sup> |
| rs4804416  | T | G | 0.57 | -0.057 | 0.009 | 3.2x10 <sup>-10</sup> | 0.007  | 0.008 | 0.37                  |
| rs657152   | C | A | 0.64 | -0.058 | 0.009 | 4.1x10 <sup>-10</sup> | -0.003 | 0.009 | 0.76                  |
| rs6885099  | A | G | 0.59 | -0.141 | 0.009 | 0.0x10+00             | -0.004 | 0.008 | 0.64                  |
| rs753760   | G | C | 0.31 | -0.100 | 0.010 | 0.0x10+00             | 0.002  | 0.009 | 0.84                  |
| rs7825175  | A | G | 0.21 | -0.066 | 0.011 | 2.9x10 <sup>-09</sup> | -0.005 | 0.010 | 0.60                  |
| rs9472138  | T | C | 0.29 | -0.079 | 0.010 | 6.7x10 <sup>-16</sup> | -0.009 | 0.009 | 0.32                  |
| rs9497965  | C | T | 0.59 | -0.051 | 0.009 | 2.3x10 <sup>-08</sup> | 0.004  | 0.008 | 0.68                  |
| rs9915657  | T | C | 0.54 | -0.064 | 0.009 | 7.5x10 <sup>-13</sup> | 0.001  | 0.008 | 0.87                  |

Inflammatory Bowel Disease

0.0x10+00

|            |   |   |      |       |       |                       |        |       |      |
|------------|---|---|------|-------|-------|-----------------------|--------|-------|------|
| rs10051722 | A | C | 0.70 | 0.070 | 0.016 | 6.2x10 <sup>-07</sup> | 0.003  | 0.009 | 0.72 |
| rs10061469 | T | C | 0.67 | 0.084 | 0.018 | 5.6x10 <sup>-10</sup> | 0.003  | 0.009 | 0.72 |
| rs10065637 | C | T | 0.79 | 0.116 | 0.021 | 3.7x10 <sup>-12</sup> | -0.001 | 0.010 | 0.96 |
| rs1042058  | C | T | 0.60 | 0.072 | 0.015 | 2.1x10 <sup>-10</sup> | 0.011  | 0.008 | 0.20 |
| rs10486483 | A | G | 0.24 | 0.085 | 0.019 | 2.6x10 <sup>-08</sup> | 0.013  | 0.009 | 0.16 |
| rs10495903 | T | C | 0.13 | 0.083 | 0.021 | 3.2x10 <sup>-10</sup> | -0.013 | 0.012 | 0.30 |
| rs10758669 | C | A | 0.34 | 0.160 | 0.015 | 7.9x10 <sup>-45</sup> | -0.006 | 0.009 | 0.52 |
| rs10761659 | G | A | 0.54 | 0.154 | 0.015 | 8.5x10 <sup>-45</sup> | 0.001  | 0.008 | 0.88 |
| rs10781499 | A | G | 0.42 | 0.172 | 0.014 | 4.4x10 <sup>-56</sup> | 0.008  | 0.008 | 0.33 |

|            |   |   |      |       |       |                        |        |       |                       |
|------------|---|---|------|-------|-------|------------------------|--------|-------|-----------------------|
| rs10865331 | A | G | 0.38 | 0.093 | 0.016 | $9.8 \times 10^{-10}$  | 0.000  | 0.008 | 0.97                  |
| rs11010067 | G | C | 0.35 | 0.109 | 0.015 | $6.7 \times 10^{-23}$  | -0.013 | 0.009 | 0.13                  |
| rs11054935 | G | A | 0.28 | 0.056 | 0.016 | $2.6 \times 10^{-06}$  | -0.012 | 0.009 | 0.21                  |
| rs11083840 | G | T | 0.41 | 0.072 | 0.018 | $1.2 \times 10^{-08}$  | -0.006 | 0.009 | 0.45                  |
| rs11150589 | T | C | 0.47 | 0.086 | 0.017 | $6.0 \times 10^{-10}$  | 0.002  | 0.008 | 0.77                  |
| rs11168249 | C | T | 0.47 | 0.053 | 0.014 | $4.6 \times 10^{-08}$  | 0.000  | 0.008 | 1.00                  |
| rs11209026 | G | A | 0.94 | 0.700 | 0.034 | $8.1 \times 10^{-161}$ | -0.006 | 0.017 | 0.74                  |
| rs11229555 | G | T | 0.76 | 0.077 | 0.017 | $6.8 \times 10^{-10}$  | 0.026  | 0.010 | 0.01                  |
| rs11230563 | C | T | 0.66 | 0.082 | 0.015 | $9.0 \times 10^{-13}$  | -0.003 | 0.009 | 0.73                  |
| rs11564258 | A | G | 0.02 | 0.288 | 0.046 | $5.0 \times 10^{-23}$  | -0.078 | 0.031 | 0.01                  |
| rs11739663 | T | C | 0.76 | 0.069 | 0.021 | $1.8 \times 10^{-08}$  | -0.012 | 0.010 | 0.20                  |
| rs11742570 | C | T | 0.61 | 0.181 | 0.015 | $3.5 \times 10^{-59}$  | 0.014  | 0.008 | 0.10                  |
| rs1182188  | T | C | 0.70 | 0.120 | 0.020 | $6.1 \times 10^{-17}$  | 0.003  | 0.009 | 0.73                  |
| rs11879191 | G | A | 0.80 | 0.128 | 0.018 | $2.0 \times 10^{-18}$  | -0.007 | 0.010 | 0.49                  |
| rs12199775 | A | G | 0.93 | 0.121 | 0.029 | $2.0 \times 10^{-08}$  | -0.020 | 0.016 | 0.21                  |
| rs1250546  | A | G | 0.57 | 0.092 | 0.015 | $8.3 \times 10^{-15}$  | -0.024 | 0.008 | 0.004                 |
| rs12568930 | T | C | 0.83 | 0.091 | 0.020 | $7.4 \times 10^{-14}$  | 0.054  | 0.011 | $5.5 \times 10^{-07}$ |
| rs1260326  | T | C | 0.40 | 0.116 | 0.017 | $4.9 \times 10^{-16}$  | -0.002 | 0.008 | 0.82                  |
| rs12663356 | C | T | 0.53 | 0.091 | 0.017 | $4.0 \times 10^{-12}$  | 0.010  | 0.008 | 0.21                  |
| rs12722515 | C | A | 0.84 | 0.097 | 0.020 | $5.8 \times 10^{-09}$  | 0.010  | 0.011 | 0.36                  |
| rs12778642 | T | G | 0.44 | 0.064 | 0.015 | $3.0 \times 10^{-08}$  | 0.001  | 0.008 | 0.93                  |

|            |   |   |      |       |       |                       |        |       |      |
|------------|---|---|------|-------|-------|-----------------------|--------|-------|------|
| rs1292053  | G | A | 0.44 | 0.073 | 0.014 | $1.8 \times 10^{-10}$ | -0.014 | 0.008 | 0.09 |
| rs12994997 | A | G | 0.52 | 0.209 | 0.017 | $4.1 \times 10^{-70}$ | 0.000  | 0.008 | 0.99 |
| rs13204742 | T | G | 0.13 | 0.160 | 0.024 | $8.4 \times 10^{-15}$ | 0.007  | 0.012 | 0.59 |
| rs13277237 | G | A | 0.43 | 0.053 | 0.014 | $1.7 \times 10^{-09}$ | -0.002 | 0.008 | 0.78 |
| rs13407913 | G | A | 0.44 | 0.103 | 0.015 | $9.4 \times 10^{-15}$ | 0.015  | 0.008 | 0.06 |
| rs1363907  | A | G | 0.43 | 0.066 | 0.015 | $8.7 \times 10^{-12}$ | 0.005  | 0.008 | 0.57 |
| rs1440088  | T | G | 0.80 | 0.095 | 0.023 | $2.9 \times 10^{-08}$ | -0.004 | 0.010 | 0.70 |
| rs1456896  | T | C | 0.67 | 0.084 | 0.016 | $9.8 \times 10^{-14}$ | -0.006 | 0.009 | 0.46 |
| rs1517352  | C | A | 0.62 | 0.074 | 0.015 | $3.3 \times 10^{-11}$ | -0.004 | 0.008 | 0.64 |
| rs1569328  | C | T | 0.83 | 0.080 | 0.019 | $3.4 \times 10^{-06}$ | 0.011  | 0.011 | 0.32 |
| rs1654644  | G | T | 0.35 | 0.083 | 0.015 | $2.5 \times 10^{-09}$ | 0.006  | 0.009 | 0.50 |
| rs17085007 | C | T | 0.18 | 0.101 | 0.019 | $3.8 \times 10^{-13}$ | -0.006 | 0.011 | 0.60 |
| rs17119    | A | G | 0.80 | 0.069 | 0.018 | $3.1 \times 10^{-11}$ | -0.007 | 0.011 | 0.53 |
| rs17229285 | C | T | 0.49 | 0.111 | 0.018 | $1.7 \times 10^{-13}$ | -0.017 | 0.008 | 0.04 |
| rs1728785  | C | A | 0.77 | 0.072 | 0.021 | $3.7 \times 10^{-08}$ | -0.001 | 0.010 | 0.92 |
| rs17293632 | T | C | 0.24 | 0.065 | 0.016 | $5.9 \times 10^{-15}$ | -0.010 | 0.010 | 0.28 |
| rs1734907  | A | G | 0.15 | 0.108 | 0.020 | $1.9 \times 10^{-10}$ | -0.023 | 0.012 | 0.05 |
| rs17391694 | C | T | 0.87 | 0.126 | 0.026 | $3.0 \times 10^{-09}$ | -0.033 | 0.013 | 0.01 |
| rs174537   | T | G | 0.35 | 0.076 | 0.015 | $1.5 \times 10^{-10}$ | -0.014 | 0.009 | 0.09 |
| rs17694108 | A | G | 0.29 | 0.095 | 0.016 | $5.9 \times 10^{-15}$ | -0.001 | 0.010 | 0.90 |
| rs17695092 | T | G | 0.69 | 0.091 | 0.019 | $4.7 \times 10^{-09}$ | -0.006 | 0.009 | 0.51 |

|            |   |   |      |       |       |                       |        |       |      |
|------------|---|---|------|-------|-------|-----------------------|--------|-------|------|
| rs17780256 | A | C | 0.81 | 0.105 | 0.023 | $1.9 \times 10^{-09}$ | 0.004  | 0.011 | 0.72 |
| rs1801274  | A | G | 0.48 | 0.117 | 0.015 | $3.5 \times 10^{-28}$ | -0.006 | 0.008 | 0.45 |
| rs1819333  | T | G | 0.53 | 0.078 | 0.015 | $3.6 \times 10^{-15}$ | -0.001 | 0.008 | 0.90 |
| rs1847472  | C | A | 0.65 | 0.058 | 0.015 | $1.1 \times 10^{-09}$ | 0.011  | 0.009 | 0.20 |
| rs1893217  | G | A | 0.17 | 0.158 | 0.019 | $3.1 \times 10^{-26}$ | 0.013  | 0.011 | 0.22 |
| rs194749   | C | T | 0.24 | 0.072 | 0.017 | $3.9 \times 10^{-08}$ | -0.017 | 0.010 | 0.07 |
| rs2024092  | A | G | 0.21 | 0.145 | 0.019 | $8.3 \times 10^{-22}$ | 0.017  | 0.010 | 0.09 |
| rs2111485  | A | G | 0.39 | 0.064 | 0.015 | $2.5 \times 10^{-07}$ | -0.005 | 0.008 | 0.52 |
| rs212388   | C | T | 0.41 | 0.100 | 0.016 | $3.0 \times 10^{-14}$ | 0.008  | 0.008 | 0.35 |
| rs2155219  | T | G | 0.49 | 0.141 | 0.015 | $4.2 \times 10^{-36}$ | 0.004  | 0.008 | 0.60 |
| rs2188962  | T | C | 0.42 | 0.147 | 0.014 | $3.7 \times 10^{-37}$ | 0.006  | 0.008 | 0.43 |
| rs2226628  | A | G | 0.29 | 0.080 | 0.016 | $2.3 \times 10^{-08}$ | 0.002  | 0.009 | 0.86 |
| rs2227551  | T | G | 0.72 | 0.079 | 0.017 | $6.7 \times 10^{-06}$ | 0.004  | 0.009 | 0.70 |
| rs2266959  | T | G | 0.19 | 0.100 | 0.018 | $1.4 \times 10^{-16}$ | 0.027  | 0.010 | 0.01 |
| rs2284553  | G | A | 0.59 | 0.116 | 0.017 | $2.1 \times 10^{-16}$ | -0.007 | 0.008 | 0.42 |
| rs2361755  | G | C | 0.92 | 0.144 | 0.028 | $1.4 \times 10^{-9}$  | 0.000  | 0.015 | 0.98 |
| rs2382817  | A | C | 0.41 | 0.070 | 0.015 | $3.7 \times 10^{-12}$ | -0.019 | 0.008 | 0.02 |
| rs2413583  | C | T | 0.84 | 0.190 | 0.020 | $4.4 \times 10^{-33}$ | -0.001 | 0.011 | 0.92 |
| rs2457996  | T | C | 0.88 | 0.091 | 0.023 | $4.2 \times 10^{-7}$  | -0.003 | 0.013 | 0.82 |

|           |   |   |      |       |       |                       |        |       |                       |
|-----------|---|---|------|-------|-------|-----------------------|--------|-------|-----------------------|
| rs2488389 | A | G | 0.22 | 0.109 | 0.017 | $5.2 \times 10^{-12}$ | -0.007 | 0.010 | 0.47                  |
| rs2503322 | G | A | 0.55 | 0.074 | 0.016 | $3.8 \times 10^{-10}$ | -0.056 | 0.008 | $7.7 \times 10^{-12}$ |
| rs254560  | A | G | 0.41 | 0.054 | 0.018 | $2.6 \times 10^{-9}$  | 0.006  | 0.008 | 0.44                  |
| rs259964  | A | G | 0.45 | 0.082 | 0.014 | $1.0 \times 10^{-12}$ | -0.002 | 0.008 | 0.83                  |
| rs2641348 | A | G | 0.89 | 0.149 | 0.027 | $2.0 \times 10^{-11}$ | 0.009  | 0.013 | 0.51                  |
| rs2651244 | G | A | 0.61 | 0.015 | 0.014 | 0.48                  | 0.010  | 0.008 | 0.26                  |
| rs26528   | C | T | 0.46 | 0.094 | 0.014 | $4.7 \times 10^{-18}$ | 0.017  | 0.010 | 0.10                  |
| rs2790216 | G | A | 0.79 | 0.064 | 0.018 | $1.6 \times 10^{-7}$  | 0.001  | 0.010 | 0.95                  |
| rs2816958 | G | A | 0.88 | 0.207 | 0.029 | $2.0 \times 10^{-17}$ | 0.005  | 0.013 | 0.73                  |
| rs2823286 | G | A | 0.71 | 0.146 | 0.016 | $9.3 \times 10^{-30}$ | 0.001  | 0.009 | 0.94                  |
| rs2836878 | G | A | 0.73 | 0.166 | 0.017 | $7.3 \times 10^{-43}$ | 0.021  | 0.009 | 0.02                  |
| rs2930047 | C | T | 0.37 | 0.063 | 0.015 | $1.0 \times 10^{-8}$  | 0.009  | 0.009 | 0.31                  |
| rs2945412 | A | G | 0.59 | 0.128 | 0.017 | $8.7 \times 10^{-17}$ | -0.002 | 0.008 | 0.86                  |
| rs3024505 | A | G | 0.15 | 0.189 | 0.019 | $6.7 \times 10^{-42}$ | -0.007 | 0.011 | 0.55                  |
| rs3091315 | A | G | 0.72 | 0.115 | 0.016 | $5.3 \times 10^{-20}$ | -0.014 | 0.009 | 0.12                  |
| rs3197999 | A | G | 0.29 | 0.166 | 0.015 | $1.0 \times 10^{-47}$ | 0.012  | 0.009 | 0.19                  |
| rs3742130 | G | A | 0.79 | 0.106 | 0.018 | $2.4 \times 10^{-14}$ | 0.001  | 0.010 | 0.94                  |
| rs3764147 | G | A | 0.22 | 0.144 | 0.019 | $2.2 \times 10^{-21}$ | -0.011 | 0.010 | 0.28                  |
| rs3766606 | G | T | 0.82 | 0.106 | 0.020 | $1.1 \times 10^{-15}$ | -0.020 | 0.011 | 0.07                  |
| rs3774937 | A | G | 0.34 | 0.112 | 0.018 | $3.7 \times 10^{-12}$ | 0.010  | 0.009 | 0.26                  |
| rs3851228 | T | A | 0.06 | 0.142 | 0.028 | $1.1 \times 10^{-13}$ | 0.033  | 0.017 | 0.04                  |

|           |   |   |      |       |       |                        |        |       |      |
|-----------|---|---|------|-------|-------|------------------------|--------|-------|------|
| rs38911   | G | A | 0.53 | 0.053 | 0.015 | $2.6 \times 10^{-7}$   | -0.006 | 0.008 | 0.50 |
| rs4243971 | G | T | 0.56 | 0.070 | 0.015 | $6.1 \times 10^{-10}$  | 0.011  | 0.008 | 0.18 |
| rs4246905 | C | T | 0.72 | 0.133 | 0.016 | $2.8 \times 10^{-32}$  | 0.007  | 0.009 | 0.45 |
| rs4256159 | T | C | 0.15 | 0.102 | 0.020 | $1.7 \times 10^{-11}$  | -0.006 | 0.011 | 0.58 |
| rs4380874 | T | C | 0.41 | 0.128 | 0.018 | $2.1 \times 10^{-26}$  | 0.007  | 0.008 | 0.42 |
| rs4409764 | T | G | 0.48 | 0.167 | 0.015 | $1.0 \times 10^{-54}$  | 0.006  | 0.008 | 0.46 |
| rs4722672 | C | T | 0.18 | 0.087 | 0.022 | $2.1 \times 10^{-8}$   | -0.011 | 0.011 | 0.30 |
| rs4728142 | A | G | 0.45 | 0.099 | 0.018 | $4.4 \times 10^{-14}$  | 0.015  | 0.008 | 0.06 |
| rs4743820 | T | C | 0.71 | 0.054 | 0.016 | $6.5 \times 10^{-9}$   | 0.009  | 0.009 | 0.32 |
| rs477515  | G | A | 0.65 | 0.367 | 0.020 | $4.7 \times 10^{-133}$ | -0.015 | 0.011 | 0.16 |
| rs4802307 | G | T | 0.70 | 0.094 | 0.018 | $2.0 \times 10^{-10}$  | -0.010 | 0.009 | 0.27 |
| rs483905  | A | G | 0.29 | 0.054 | 0.019 | $1.2 \times 10^{-8}$   | -0.002 | 0.009 | 0.87 |
| rs4845604 | G | A | 0.85 | 0.135 | 0.021 | $5.3 \times 10^{-16}$  | 0.013  | 0.012 | 0.26 |
| rs4976646 | A | G | 0.34 | 0.066 | 0.015 | $1.7 \times 10^{-8}$   | -0.010 | 0.009 | 0.25 |
| rs516246  | T | C | 0.50 | 0.102 | 0.016 | $1.0 \times 10^{-15}$  | 0.018  | 0.008 | 0.03 |
| rs529866  | C | T | 0.80 | 0.117 | 0.019 | $1.5 \times 10^{-12}$  | 0.011  | 0.010 | 0.26 |
| rs559928  | C | T | 0.81 | 0.096 | 0.019 | $4.2 \times 10^{-11}$  | 0.022  | 0.010 | 0.04 |
| rs561722  | C | T | 0.67 | 0.113 | 0.019 | $5.2 \times 10^{-17}$  | 0.015  | 0.009 | 0.08 |
| rs566416  | T | G | 0.77 | 0.071 | 0.017 | $2.6 \times 10^{-6}$   | 0.005  | 0.010 | 0.61 |
| rs568617  | T | C | 0.18 | 0.080 | 0.018 | $3.0 \times 10^{-6}$   | -0.009 | 0.011 | 0.42 |
| rs5743289 | T | C | 0.17 | 0.443 | 0.020 | $5.6 \times 10^{-166}$ | -0.016 | 0.011 | 0.16 |

|           |   |   |      |       |       |                       |        |       |      |
|-----------|---|---|------|-------|-------|-----------------------|--------|-------|------|
| rs5763767 | A | G | 0.45 | 0.077 | 0.014 | 2.7x10 <sup>-14</sup> | -0.004 | 0.008 | 0.65 |
| rs6017342 | C | A | 0.53 | 0.205 | 0.018 | 1.4x10 <sup>-43</sup> | -0.004 | 0.009 | 0.66 |
| rs6074022 | C | T | 0.25 | 0.087 | 0.016 | 6.6x10 <sup>-11</sup> | -0.006 | 0.009 | 0.52 |
| rs6087990 | C | T | 0.41 | 0.072 | 0.015 | 1.2x10 <sup>-9</sup>  | 0.018  | 0.008 | 0.03 |
| rs6088765 | G | T | 0.43 | 0.076 | 0.018 | 2.2x10 <sup>-8</sup>  | -0.007 | 0.008 | 0.38 |
| rs6426833 | A | G | 0.54 | 0.235 | 0.018 | 2.4x10 <sup>-68</sup> | -0.002 | 0.008 | 0.85 |
| rs6651252 | T | C | 0.87 | 0.170 | 0.026 | 1.5x10 <sup>-16</sup> | -0.015 | 0.012 | 0.22 |
| rs6667605 | C | T | 0.50 | 0.075 | 0.018 | 2.6x10 <sup>-12</sup> | 0.015  | 0.008 | 0.07 |
| rs6679677 | C | A | 0.90 | 0.179 | 0.030 | 2.0x10 <sup>-15</sup> | 0.018  | 0.014 | 0.18 |
| rs670523  | A | G | 0.33 | 0.058 | 0.015 | 3.7x10 <sup>-7</sup>  | 0.001  | 0.009 | 0.88 |
| rs6708413 | G | A | 0.23 | 0.098 | 0.017 | 6.2x10 <sup>-17</sup> | 0.006  | 0.010 | 0.52 |
| rs6716753 | C | T | 0.19 | 0.126 | 0.020 | 1.2x10 <sup>-16</sup> | -0.006 | 0.010 | 0.59 |
| rs6740462 | A | C | 0.73 | 0.078 | 0.016 | 2.4x10 <sup>-8</sup>  | -0.014 | 0.012 | 0.24 |
| rs6863411 | T | A | 0.62 | 0.085 | 0.015 | 1.3x10 <sup>-12</sup> | -0.006 | 0.008 | 0.45 |
| rs6871626 | A | C | 0.34 | 0.166 | 0.015 | 1.4x10 <sup>-42</sup> | 0.006  | 0.009 | 0.50 |
| rs6920220 | A | G | 0.21 | 0.097 | 0.018 | 1.0x10 <sup>-14</sup> | -0.001 | 0.010 | 0.94 |
| rs7015630 | T | C | 0.74 | 0.072 | 0.019 | 1.4x10 <sup>-8</sup>  | -0.006 | 0.009 | 0.49 |
| rs7097656 | C | T | 0.80 | 0.109 | 0.018 | 1.3x10 <sup>-14</sup> | 0.001  | 0.010 | 0.95 |
| rs7134599 | A | G | 0.39 | 0.092 | 0.015 | 1.2x10 <sup>-22</sup> | -0.005 | 0.008 | 0.56 |
| rs7240004 | A | G | 0.63 | 0.055 | 0.015 | 9.8x10 <sup>-9</sup>  | -0.006 | 0.008 | 0.51 |
| rs727088  | G | A | 0.48 | 0.074 | 0.014 | 4.7x10 <sup>-9</sup>  | 0.012  | 0.008 | 0.16 |



|           |   |   |      |       |       |                       |        |       |      |
|-----------|---|---|------|-------|-------|-----------------------|--------|-------|------|
| rs7282490 | G | A | 0.40 | 0.100 | 0.015 | $2.4 \times 10^{-26}$ | 0.000  | 0.008 | 0.96 |
| rs7438704 | G | A | 0.65 | 0.083 | 0.017 | $1.8 \times 10^{-8}$  | 0.003  | 0.009 | 0.75 |
| rs7495132 | C | T | 0.88 | 0.126 | 0.024 | $9.5 \times 10^{-11}$ | -0.003 | 0.013 | 0.82 |
| rs7517810 | T | C | 0.24 | 0.118 | 0.019 | $5.5 \times 10^{-22}$ | 0.014  | 0.010 | 0.14 |
| rs7554511 | C | A | 0.70 | 0.152 | 0.016 | $1.2 \times 10^{-32}$ | 0.007  | 0.009 | 0.45 |
| rs7657746 | A | G | 0.74 | 0.110 | 0.017 | $2.8 \times 10^{-13}$ | 0.002  | 0.009 | 0.82 |
| rs7746082 | C | G | 0.29 | 0.103 | 0.015 | $2.5 \times 10^{-17}$ | 0.002  | 0.009 | 0.87 |
| rs8005161 | T | C | 0.09 | 0.142 | 0.025 | $2.4 \times 10^{-14}$ | -0.008 | 0.014 | 0.59 |
| rs864745  | T | C | 0.50 | 0.083 | 0.017 | $3.7 \times 10^{-9}$  | 0.000  | 0.008 | 0.96 |
| rs907611  | A | G | 0.32 | 0.066 | 0.016 | $2.7 \times 10^{-10}$ | 0.013  | 0.009 | 0.16 |
| rs913678  | T | C | 0.67 | 0.054 | 0.015 | $4.6 \times 10^{-8}$  | -0.001 | 0.009 | 0.92 |
| rs921720  | G | A | 0.63 | 0.078 | 0.015 | $6.7 \times 10^{-15}$ | -0.002 | 0.008 | 0.80 |
| rs925255  | C | T | 0.52 | 0.088 | 0.015 | $2.5 \times 10^{-14}$ | -0.007 | 0.008 | 0.38 |
| rs9264942 | C | T | 0.35 | 0.135 | 0.017 | $5.0 \times 10^{-28}$ | -0.007 | 0.009 | 0.44 |
| rs9297145 | C | A | 0.26 | 0.079 | 0.016 | $8.2 \times 10^{-12}$ | -0.004 | 0.009 | 0.69 |
| rs9358372 | G | A | 0.37 | 0.085 | 0.015 | $1.6 \times 10^{-12}$ | 0.000  | 0.008 | 0.96 |
| rs941823  | C | T | 0.75 | 0.069 | 0.017 | $3.8 \times 10^{-10}$ | -0.005 | 0.009 | 0.63 |
| rs9847710 | C | T | 0.42 | 0.062 | 0.018 | $1.1 \times 10^{-8}$  | -0.015 | 0.008 | 0.08 |

Type 1 Diabetes

|            |   |   |      |       |    |                      |        |       |      |
|------------|---|---|------|-------|----|----------------------|--------|-------|------|
| rs10492166 | G | A | 0.50 | 0.139 | NA | $6.0 \times 10^{-9}$ | -0.014 | 0.012 | 0.23 |
| rs10758593 | A | G | 0.40 | 0.140 | NA | $1.2 \times 10^{-8}$ | -0.005 | 0.008 | 0.52 |

|            |   |   |      |       |    |                        |        |       |      |
|------------|---|---|------|-------|----|------------------------|--------|-------|------|
| rs11571316 | G | A | 0.58 | 0.198 | NA | $2.4 \times 10^{-15}$  | 0.004  | 0.008 | 0.62 |
| rs12908309 | G | A | 0.76 | 0.163 | NA | $4.3 \times 10^{-8}$   | 0.002  | 0.010 | 0.86 |
| rs12927355 | C | T | 0.68 | 0.223 | NA | $1.9 \times 10^{-16}$  | -0.006 | 0.009 | 0.53 |
| rs1893217  | G | A | 0.17 | 0.182 | NA | $1.6 \times 10^{-8}$   | 0.013  | 0.011 | 0.22 |
| rs1990760  | T | C | 0.61 | 0.139 | NA | $2.2 \times 10^{-8}$   | 0.008  | 0.008 | 0.34 |
| rs2476601  | A | G | 0.10 | 0.673 | NA | $5.9 \times 10^{-80}$  | -0.018 | 0.013 | 0.18 |
| rs3024493  | C | A | 0.85 | 0.198 | NA | $2.0 \times 10^{-8}$   | 0.006  | 0.011 | 0.62 |
| rs3184504  | T | C | 0.48 | 0.236 | NA | $1.8 \times 10^{-21}$  | 0.020  | 0.008 | 0.01 |
| rs478222   | A | T | 0.59 | 0.139 | NA | $3.5 \times 10^{-9}$   | 0.008  | 0.008 | 0.32 |
| rs539514   | T | A | 0.51 | 0.128 | NA | $5.7 \times 10^{-11}$  | 0.005  | 0.008 | 0.56 |
| rs597325   | G | A | 0.61 | 0.163 | NA | $3.4 \times 10^{-10}$  | -0.008 | 0.008 | 0.34 |
| rs6916742  | C | T | 0.54 | 1.427 | NA | $4.0 \times 10^{-307}$ | 0.006  | 0.014 | 0.67 |
| rs705704   | A | G | 0.34 | 0.300 | NA | $4.3 \times 10^{-31}$  | -0.008 | 0.009 | 0.37 |
| rs7090530  | A | C | 0.60 | 0.198 | NA | $2.9 \times 10^{-15}$  | -0.003 | 0.008 | 0.75 |
| rs7928968  | T | A | 0.23 | 0.223 | NA | $2.8 \times 10^{-14}$  | 0.015  | 0.011 | 0.15 |
| rs924043   | C | T | 0.86 | 0.174 | NA | $8.1 \times 10^{-9}$   | -0.004 | 0.012 | 0.77 |
| rs9924471  | A | G | 0.16 | 0.215 | NA | $1.2 \times 10^{-11}$  | 0.010  | 0.011 | 0.35 |

Fasting Glucose

|            |   |   |      |       |       |                       |        |       |      |
|------------|---|---|------|-------|-------|-----------------------|--------|-------|------|
| rs10305492 | G | A | 0.98 | 0.090 | 0.013 | $3.4 \times 10^{-12}$ | -0.012 | 0.037 | 0.75 |
| rs10747083 | A | G | 0.68 | 0.013 | 0.002 | $7.6 \times 10^{-9}$  | -0.012 | 0.009 | 0.18 |

|            |   |   |      |       |       |                        |        |       |       |
|------------|---|---|------|-------|-------|------------------------|--------|-------|-------|
| rs10811661 | T | C | 0.82 | 0.024 | 0.003 | $5.7 \times 10^{-18}$  | 0.007  | 0.011 | 0.55  |
| rs10814916 | C | A | 0.51 | 0.016 | 0.002 | $2.3 \times 10^{-13}$  | -0.006 | 0.008 | 0.49  |
| rs10830963 | G | C | 0.28 | 0.078 | 0.003 | $1.1 \times 10^{-215}$ | 0.014  | 0.010 | 0.15  |
| rs11039182 | T | C | 0.72 | 0.023 | 0.002 | $4.8 \times 10^{-22}$  | -0.011 | 0.009 | 0.24  |
| rs11195502 | C | T | 0.91 | 0.032 | 0.004 | $2.0 \times 10^{-18}$  | 0.002  | 0.014 | 0.89  |
| rs11558471 | A | G | 0.68 | 0.029 | 0.002 | $7.8 \times 10^{-37}$  | -0.019 | 0.009 | 0.03  |
| rs11603334 | G | A | 0.84 | 0.019 | 0.003 | $1.1 \times 10^{-11}$  | -0.003 | 0.011 | 0.82  |
| rs11607883 | G | A | 0.48 | 0.021 | 0.002 | $6.3 \times 10^{-24}$  | -0.014 | 0.008 | 0.10  |
| rs11619319 | G | A | 0.22 | 0.020 | 0.002 | $1.3 \times 10^{-15}$  | 0.001  | 0.010 | 0.89  |
| rs11708067 | A | G | 0.76 | 0.023 | 0.003 | $1.3 \times 10^{-18}$  | -0.024 | 0.010 | 0.01  |
| rs11715915 | C | T | 0.69 | 0.012 | 0.002 | $4.9 \times 10^{-8}$   | -0.012 | 0.009 | 0.16  |
| rs1280     | T | C | 0.87 | 0.026 | 0.003 | $8.6 \times 10^{-18}$  | 0.020  | 0.012 | 0.10  |
| rs16913693 | T | G | 0.97 | 0.043 | 0.007 | $3.5 \times 10^{-11}$  | 0.083  | 0.027 | 0.002 |
| rs174576   | C | A | 0.65 | 0.020 | 0.002 | $1.2 \times 10^{-18}$  | 0.016  | 0.009 | 0.07  |
| rs2191349  | T | G | 0.54 | 0.029 | 0.002 | $1.3 \times 10^{-42}$  | 0.012  | 0.008 | 0.16  |
| rs2302593  | C | G | 0.51 | 0.014 | 0.002 | $9.3 \times 10^{-10}$  | 0.007  | 0.009 | 0.44  |
| rs2908289  | A | G | 0.17 | 0.057 | 0.003 | $3.3 \times 10^{-88}$  | 0.009  | 0.011 | 0.42  |
| rs340874   | C | T | 0.56 | 0.013 | 0.002 | $4.1 \times 10^{-10}$  | -0.004 | 0.008 | 0.62  |
| rs3783347  | G | T | 0.77 | 0.017 | 0.003 | $1.3 \times 10^{-10}$  | -0.020 | 0.010 | 0.05  |
| rs3829109  | G | A | 0.73 | 0.017 | 0.003 | $1.1 \times 10^{-10}$  | -0.001 | 0.010 | 0.95  |
| rs4502156  | T | C | 0.56 | 0.022 | 0.002 | $1.4 \times 10^{-25}$  | 0.002  | 0.008 | 0.78  |

|           |   |   |      |       |       |                        |        |       |      |
|-----------|---|---|------|-------|-------|------------------------|--------|-------|------|
| rs4869272 | T | C | 0.69 | 0.018 | 0.002 | $1.0 \times 10^{-15}$  | 0.004  | 0.009 | 0.63 |
| rs560887  | C | T | 0.70 | 0.071 | 0.003 | $1.4 \times 10^{-178}$ | 0.014  | 0.009 | 0.13 |
| rs576674  | G | A | 0.17 | 0.017 | 0.003 | $2.3 \times 10^{-8}$   | -0.003 | 0.011 | 0.81 |
| rs6072275 | A | G | 0.15 | 0.016 | 0.003 | $1.7 \times 10^{-8}$   | 0.005  | 0.011 | 0.64 |
| rs6113722 | G | A | 0.96 | 0.035 | 0.005 | $2.5 \times 10^{-11}$  | 0.001  | 0.022 | 0.96 |
| rs651007  | G | A | 0.79 | 0.020 | 0.000 | $1.3 \times 10^{-8}$   | -0.011 | 0.010 | 0.27 |
| rs6943153 | T | C | 0.32 | 0.015 | 0.002 | $1.6 \times 10^{-12}$  | -0.006 | 0.009 | 0.47 |
| rs7651090 | G | A | 0.31 | 0.013 | 0.002 | $1.8 \times 10^{-8}$   | -0.020 | 0.009 | 0.03 |
| rs780094  | C | T | 0.61 | 0.027 | 0.002 | $2.6 \times 10^{-37}$  | 0.007  | 0.008 | 0.39 |
| rs7903146 | T | C | 0.29 | 0.022 | 0.002 | $2.7 \times 10^{-20}$  | 0.018  | 0.009 | 0.04 |
| rs9368222 | A | C | 0.27 | 0.014 | 0.002 | $1.0 \times 10^{-9}$   | 0.011  | 0.009 | 0.23 |
| rs983309  | T | G | 0.12 | 0.026 | 0.003 | $6.3 \times 10^{-15}$  | -0.020 | 0.013 | 0.12 |

Grip Strength \*

|            |   |   |      |        |       |                       |       |      |      |
|------------|---|---|------|--------|-------|-----------------------|-------|------|------|
| rs11236185 | A | G | 0.51 | -0.164 | 0.026 | $3.8 \times 10^{-10}$ | 0.02  | 0.01 | 0.20 |
| rs11614333 | T | C | 0.37 | -0.181 | 0.027 | $5.0 \times 10^{-11}$ | -0.03 | 0.01 | 0.04 |
| rs1556659  | C | T | 0.63 | -0.156 | 0.027 | $6.8 \times 10^{-09}$ | -0.02 | 0.01 | 0.24 |
| rs17563986 | G | A | 0.21 | -0.181 | 0.031 | $5.2 \times 10^{-09}$ | -0.03 | 0.02 | 0.07 |
| rs2110927  | T | C | 0.74 | -0.161 | 0.029 | $4.4 \times 10^{-8}$  | 0.01  | 0.01 | 0.44 |
| rs2273555  | G | A | 0.41 | -0.153 | 0.027 | $9.1 \times 10^{-9}$  | -0.02 | 0.01 | 0.10 |
| rs2288278  | G | A | 0.35 | -0.162 | 0.027 | $3.0 \times 10^{-9}$  | 0.01  | 0.01 | 0.40 |

|           |   |   |      |        |       |                       |       |      |      |
|-----------|---|---|------|--------|-------|-----------------------|-------|------|------|
| rs329676  | C | G | 0.66 | -0.141 | 0.027 | $1.6 \times 10^{-7}$  | 0.00  | 0.01 | 0.92 |
| rs4926611 | T | C | 0.37 | -0.173 | 0.027 | $1.3 \times 10^{-10}$ | 0.03  | 0.01 | 0.05 |
| rs6539344 | T | G | 0.58 | -0.144 | 0.026 | $4.9 \times 10^{-8}$  | -0.01 | 0.01 | 0.53 |
| rs660895  | G | A | 0.20 | -0.176 | 0.032 | $3.1 \times 10^{-8}$  | -0.03 | 0.02 | 0.10 |
| rs6687430 | A | G | 0.56 | -0.150 | 0.026 | $7.6 \times 10^{-9}$  | 0.00  | 0.01 | 0.72 |
| rs7558957 | C | T | 0.51 | -0.158 | 0.027 | $4.3 \times 10^{-9}$  | 0.00  | 0.01 | 0.88 |
| rs958685  | C | A | 0.50 | -0.154 | 0.026 | $2.8 \times 10^{-9}$  | 0.02  | 0.01 | 0.22 |
| rs9914011 | C | G | 0.71 | 0.125  | 0.029 | $1.6 \times 10^{-5}$  | 0.00  | 0.02 | 0.88 |

---

\*the fracture effect estimates are derived after excluding EPIC and UKBB from the fracture meta-analysis

Table S6A | Independent Signals from the discovery phase with p-values < 5 x 10<sup>-6</sup>

| Locus    | SNP         | Effect Allele | Effect Allele Frequency | Odds Ratio | P-value  | Closest Gene       |
|----------|-------------|---------------|-------------------------|------------|----------|--------------------|
| 7q31.31  | rs2908007   | a             | 0.60                    | 1.08       | 1.23E-20 | WNT16, FAM3C       |
| 6q22.33  | rs10457487  | c             | 0.51                    | 1.07       | 2.32E-15 | RSPO3              |
| 10q21.1  | rs11003047  | g             | 0.11                    | 1.10       | 6.17E-13 | MBL2, DKK1         |
| 18p11.21 | rs4635400   | a             | 0.36                    | 1.06       | 1.52E-12 | FAM210A            |
| 17q21.31 | rs2741856   | g             | 0.92                    | 1.11       | 2.36E-12 | MEOX1, SOST, DUSP3 |
| 17q21.31 | rs4793022   | g             | 0.62                    | 1.06       | 7.30E-12 | MEOX1, SOST, DUSP3 |
| 6q25.1   | rs2982570   | c             | 0.58                    | 1.06       | 8.11E-12 | ESR1               |
| 21q22.2  | rs9980072   | g             | 0.73                    | 1.06       | 8.34E-12 | ETS2               |
| 6q22.33  | rs9491689   | c             | 0.71                    | 1.06       | 2.39E-10 | RSPO3              |
| 7q21.3   | rs6465508   | g             | 0.34                    | 1.05       | 3.98E-09 | C7orf76, SHFM1     |
| 7q31.31  | rs2536189   | c             | 0.56                    | 1.05       | 1.84E-08 | WNT16, FAM3C       |
| 6q22.33  | rs1930955   | g             | 0.45                    | 1.05       | 1.87E-08 | RSPO3              |
| 4p16.3   | rs138081769 | c             | 0.05                    | 1.15       | 2.66E-08 | PCGF3              |
| 7p12.1   | rs1548607   | g             | 0.32                    | 1.05       | 3.24E-08 | GRB10, COBL        |
| 2p22.1   | rs11900510  | c             | 0.40                    | 1.06       | 4.67E-08 | SLC8A1             |
| 7p14.1   | rs10280461  | c             | 0.46                    | 1.04       | 9.35E-08 | STARD3NL           |
| 10q21.1  | rs10762857  | c             | 0.37                    | 1.05       | 2.16E-07 | MBL2               |
| 4p16.3   | rs11937228  | a             | 0.12                    | 1.07       | 2.44E-07 | SPON2              |
| 18q12.2  | rs79434015  | t             | 0.91                    | 1.10       | 2.55E-07 | -                  |
| 5q31.1   | rs10052731  | c             | 0.16                    | 1.06       | 2.70E-07 | TGFBI              |
| 7q31.31  | rs17284876  | g             | 0.82                    | 1.06       | 3.06E-07 | CPED1              |
| 21q22.2  | rs2836778   | c             | 0.61                    | 1.05       | 3.40E-07 | ETS2               |
| 8p21.3   | rs4921656   | c             | 0.79                    | 1.05       | 3.86E-07 | SCGALNACT1         |
| 5q34     | rs12517141  | t             | 0.63                    | 1.06       | 4.26E-07 | GABRA6             |
| 14q24.1  | rs11626090  | a             | 0.27                    | 1.05       | 4.42E-07 | RAD52B             |

|          |             |   |      |      |          |               |
|----------|-------------|---|------|------|----------|---------------|
| 16q12.2  | rs8059888   | c | 0.51 | 1.04 | 5.45E-07 | IRX5          |
| 1p36.12  | rs12568930  | t | 0.82 | 1.06 | 6.03E-07 | ZBTB40        |
| 14q32.12 | rs1075472   | g | 0.18 | 1.05 | 6.19E-07 | RIN3          |
| 6q25.1   | rs6925996   | c | 0.30 | 1.05 | 6.57E-07 | CCDC170       |
| 5q14.1   | rs378912    | a | 0.18 | 1.05 | 6.80E-07 | ARSB          |
| 6q25.1   | rs6929137   | a | 0.33 | 1.04 | 8.43E-07 | CCDC170       |
| 13q14.3  | rs4883723   | a | 0.14 | 1.06 | 8.90E-07 | OLFM4         |
| 10q21.1  | rs17662737  | t | 0.77 | 1.05 | 9.11E-07 | MBL2          |
| 7p12.3   | rs71547894  | c | 0.60 | 1.05 | 9.83E-07 | ABCA13        |
| 10q26.13 | rs7082865   | a | 0.46 | 1.04 | 1.16E-06 | BTB16         |
| 1p36.12  | rs10753536  | g | 0.61 | 1.04 | 1.28E-06 | ZBTB40        |
| 6q22.33  | rs9491675   | g | 0.86 | 1.06 | 1.35E-06 | RSPO3         |
| 2p21     | rs13430285  | a | 0.22 | 1.05 | 1.42E-06 | SIX2          |
| 21q22.11 | rs2833404   | t | 0.05 | 1.12 | 1.55E-06 | TIAM1         |
| 2q32.2   | rs17271239  | g | 0.02 | 1.22 | 1.73E-06 | ANKAR         |
| 2p22.1   | rs10490046  | c | 0.23 | 1.05 | 1.84E-06 | SLC8A1        |
| 10q22.1  | rs3902977   | a | 0.26 | 1.05 | 2.08E-06 | PCBD1         |
| 2p24.3   | rs10180470  | g | 0.88 | 1.06 | 2.45E-06 | TRIB2         |
| 17q21.31 | rs3859274   | t | 0.72 | 1.06 | 2.76E-06 | C17orf53      |
| 17q25.1  | rs17462688  | a | 0.86 | 1.06 | 2.88E-06 | SD300C        |
| 4q13.3   | rs12642402  | a | 0.05 | 1.10 | 2.98E-06 | AREG,AREGB    |
| 18q12.2  | rs4145297   | c | 0.59 | 1.05 | 3.42E-06 | -             |
| 14q21.2  | rs2415962   | t | 0.55 | 1.04 | 3.44E-06 | RPL10L        |
| 6q12     | rs9351261   | t | 0.63 | 1.04 | 3.77E-06 | EYS           |
| 13q31.1  | rs117906587 | t | 0.02 | 1.22 | 3.82E-06 | RNAF219,RBM26 |
| 5q35.2   | rs114233559 | a | 0.01 | 1.23 | 4.04E-06 | BOD1,CPEB4    |
| 9q21.13  | rs73477413  | a | 0.04 | 1.14 | 4.22E-06 | TMEM2         |
| 9q34.11  | rs7030440   | a | 0.34 | 1.04 | 4.54E-06 | ASS1,FUB3     |
| 6q22.33  | rs11154370  | a | 0.96 | 1.10 | 4.58E-06 | RSPO3         |
| 8q24.22  | rs28697871  | g | 0.99 | 1.23 | 4.61E-06 | KHDRBS3       |
| 10q21.1  | rs12763968  | a | 0.03 | 1.16 | 4.65E-06 | PRKG1         |

|         |            |   |      |      |          |              |
|---------|------------|---|------|------|----------|--------------|
| 7q31.31 | rs77224217 | g | 0.95 | 1.11 | 4.67E-06 | TSPAN12      |
| 4p16.3  | rs35654957 | c | 0.37 | 1.05 | 4.73E-06 | FGFRL1       |
| 4q26    | rs7676164  | a | 0.70 | 1.04 | 4.82E-06 | CAMK2D,AR SJ |

---



**Table S6B | Signals with  $p < 5 \times 10^{-8}$  in the discovery followed for replication in 23andMe**

| Locus    | Candidate Gene | Top SNP       | Distance to Gene (kb) | EA | EAF  | Discovery<br>37,857 cases<br>227,116 controls |                       | Replication<br>147,200 cases<br>150,085 controls |                       | Combined<br>185,057 cases<br>377,201 controls |                       |         |                |
|----------|----------------|---------------|-----------------------|----|------|-----------------------------------------------|-----------------------|--------------------------------------------------|-----------------------|-----------------------------------------------|-----------------------|---------|----------------|
|          |                |               |                       |    |      | OR<br>(95% CI)                                | P-value               | OR<br>(95% CI)                                   | P-value               | OR<br>(95% CI)                                | P-value               | N cases | I <sup>2</sup> |
| 2q21.1   | SLC8A1         | rs11900510*   | 0                     | C  | 0.40 | 1.06 (1.03-1.08)                              | 4.7x10 <sup>-08</sup> | 1.02 (1.01-1.03)                                 | 3.1x10 <sup>-3</sup>  | 1.03 (1.02-1.04)                              | 3.7x10 <sup>-07</sup> | 164,618 | 85             |
| 4p16.3   | FGFRL1         | rs111632154** | 0                     | C  | 0.05 | 1.15 (1.09-1.20)                              | 4.2x10 <sup>-08</sup> | 1.05 (1.02-1.08)                                 | 7.4x10 <sup>-04</sup> | 1.09 (1.04-1.09)                              | 2.4x10 <sup>-08</sup> | 164,618 | 83             |
|          |                | rs138081769*† |                       | C  | 0.01 | 1.15 (1.10-1.22)                              | 2.7x10 <sup>-08</sup> | 1.03 (1.00-1.06)                                 | 0.02                  | 1.05 (1.03-1.04)                              | 5.5x10 <sup>-06</sup> | 164,618 |                |
| 6q22.33  | RSPO3          | rs10457487    | 0.324                 | C  | 0.51 | 1.06 (1.05-1.08)                              | 2.3x10 <sup>-15</sup> | 1.04 (1.03-1.05)                                 | 1.7x10 <sup>-15</sup> | 1.05 (1.04-1.06)                              | 4.8x10 <sup>-28</sup> | 185,057 | 5              |
|          |                | rs1930955*†   |                       | G  | 0.45 | 1.05 (1.03-1.06)                              | 1.9x10 <sup>-08</sup> | 1.01 (0.99-1.02)                                 | 0.19                  | 1.02 (1.01-1.03)                              | 3.3x10 <sup>-05</sup> | 185,056 |                |
| 6q25.1   | ESR1           | rs2982570     | 0                     | C  | 0.58 | 1.05 (1.04-1.07)                              | 8.1x10 <sup>-12</sup> | 1.03 (1.02-1.04)                                 | 5.2x10 <sup>-10</sup> | 1.04 (1.03-1.05)                              | 4.5x10 <sup>-19</sup> | 185,057 | 23             |
| 7q31.31  | WNT16          | rs2908007     | -18.99                | A  | 0.60 | 1.08 (1.06-1.10)                              | 1.2x10 <sup>-20</sup> | 1.05 (1.04-1.06)                                 | 5.6x10 <sup>-22</sup> | 1.06 (1.05-1.07)                              | 2.3x10 <sup>-39</sup> | 185,055 | 0              |
|          | CPED1          |               | 24.67                 |    |      |                                               |                       |                                                  |                       |                                               |                       |         |                |
| 7q31.31  |                | rs2536189†    |                       | C  | 0.56 | 1.05 (0.03-1.06)                              | 1.9x10 <sup>-08</sup> | 1.03 (1.02-1.04)                                 | 7.4x10 <sup>-08</sup> | 1.03 (1.02-1.04)                              | 3.9x10 <sup>-14</sup> | 185,056 |                |
| 7q21.3   | C7orf76        | rs6465508     | 0                     | G  | 0.34 | 1.05 (1.03-1.07)                              | 4.0x10 <sup>-09</sup> | 1.04 (1.03-1.05)                                 | 4.1x10 <sup>-12</sup> | 1.04 (1.03-1.05)                              | 2.0x10 <sup>-19</sup> | 185,056 | 35             |
|          | SHFM1          |               | 0                     |    |      |                                               |                       |                                                  |                       |                                               |                       |         |                |
| 7p21.1   | GRB10          | rs1548607     | 40.33                 | G  | 0.32 | 1.05 (1.03-1.07)                              | 3.2x10 <sup>-08</sup> | 1.02 (1.01-1.04)                                 | 2.1x10 <sup>-04</sup> | 1.03 (1.02-1.05)                              | 4.7x10 <sup>-10</sup> | 185,052 | 40             |
|          | COBL           |               | -182.4                |    |      |                                               |                       |                                                  |                       |                                               |                       |         |                |
| 10q21.1  | MBL2           | rs11003047    | -90.63                | G  | 0.11 | 1.09 (1.07-1.12)                              | 6.2x10 <sup>-12</sup> | 1.08 (1.07-1.10)                                 | 1.4x10 <sup>-21</sup> | 1.09 (1.07-1.10)                              | 9.5x10 <sup>-33</sup> | 185,057 | 0              |
| 17q21.31 | SOST           | rs2741856     | -4.26                 | G  | 0.92 | 1.11 (1.08-1.14)                              | 2.4x10 <sup>-12</sup> | 1.08 (1.06-1.11)                                 | 6.3x10 <sup>-15</sup> | 1.10 (1.07-1.11)                              | 3.1x10 <sup>-25</sup> | 184,977 | 0              |
|          | DUSP3          |               | -16.65                |    |      |                                               |                       |                                                  |                       |                                               |                       |         |                |
|          | MEOX1          |               | 87.52                 |    |      |                                               |                       |                                                  |                       |                                               |                       |         |                |
| 18p11.21 | FAM210A        | rs4793022†    |                       | G  | 0.62 | 1.06 (1.04-1.08)                              | 7.3x10 <sup>-12</sup> | 1.04 (1.03-1.05)                                 | 2.8x10 <sup>-12</sup> | 1.04 (1.03-1.05)                              | 1.0x10 <sup>-21</sup> | 185,056 |                |
|          | RNMT           | rs4635400     | 0                     | A  | 0.36 | 1.06 (1.04-1.07)                              | 1.5x10 <sup>-12</sup> | 1.03 (1.02-1.04)                                 | 2.7x10 <sup>-09</sup> | 1.04 (1.03-1.05)                              | 1.1x10 <sup>-18</sup> | 185,057 | 22             |
| 21q22.2  | ETS2           | rs9980072     | 141.9                 | G  | 0.73 | 1.06 (1.04-1.08)                              | 8.4x10 <sup>-12</sup> | 1.03 (1.01-1.04)                                 | 1.8x10 <sup>-05</sup> | 1.04 (1.03-1.05)                              | 3.4x10 <sup>-13</sup> | 185,057 | 36             |

\*rs11900510 did not replicate

\*\*rs11632154 had high heterogeneity and was tested using random effect and was no longer significant

† did not survive conditional analyses

**Table S6C | Meta-analysis results across stages for SNPs that did not replicate in GENOMOS**

| Locus    | SNP        | EA | NEA | EAF    | DISCOVERY                          |          |                                  |      |                                     |      |                                      |                       | REPLICATION                          |      |                                      |      | COMBINED 61,785 cases 273,543 controls |         |                |    |
|----------|------------|----|-----|--------|------------------------------------|----------|----------------------------------|------|-------------------------------------|------|--------------------------------------|-----------------------|--------------------------------------|------|--------------------------------------|------|----------------------------------------|---------|----------------|----|
|          |            |    |     |        | GEFOS 20,439 cases 78,843 controls |          | EPIC 2,926 cases 17,710 controls |      | UKBB 14,492 cases 139,9563 controls |      | POOLED 37,856 cases 227,116 controls |                       | In silico 4,119 cases 6,219 controls |      | GENOMOS 12,694 cases 23,793 controls |      | OR                                     | P-value | I <sup>2</sup> |    |
| 2p16.2   | rs2941584  | t  | c   | 0.3131 | 1.07                               | 1.13E-07 | 0.98                             | 0.56 | 1.00                                | 0.72 | 1.03                                 | 0.003                 | 45                                   | 1.03 | 0.41                                 | 1.05 | 6.74E-03                               | 1.03    | 8.6x10-05      | 42 |
| 1p36.12  | rs6426749  | g  | c   | 0.8288 | 1.09                               | 5.30E-07 | 1.07                             | 0.07 | 1.02                                | 0.13 | 1.05                                 | 2.1x10 <sup>-6</sup>  | 16                                   | 1.05 | 0.31                                 | 1.04 | 0.12                                   | 1.05    | 2.1x10-07      | 2  |
| 10q11.21 | rs11239303 | a  | g   | 0.9424 | 1.16                               | 5.55E-07 | 0.94                             | 0.33 | 1.01                                | 0.78 | 1.06                                 | 0.002                 | 55                                   | 0.95 | 0.69                                 | 1.03 | 0.53                                   | 1.05    | 3.1x10-03      | 38 |
| 1p36.12  | rs10493013 | t  | c   | 0.8286 | 1.09                               | 5.86E-07 | 1.07                             | 0.08 | 1.03                                | 0.08 | 1.05                                 | 8.8x10 <sup>-07</sup> | 8                                    | 1.04 | 0.34                                 | -    | -                                      | 1.05    | 6.1x10-07      | 10 |
| 16p13.13 | rs12102589 | g  | a   | 0.0332 | 1.19                               | 6.08E-07 | 1.01                             | 0.87 | 1.00                                | 0.95 | 1.08                                 | 8.3x10 <sup>-04</sup> | 30                                   | 1.01 | 0.85                                 | 0.97 | 0.45                                   | 1.05    | 9.0x10-03      | 18 |
| 9q34.11  | rs7030440  | a  | g   | 0.3446 | 1.07                               | 8.36E-07 | 1.04                             | 0.26 | 1.02                                | 0.12 | 1.04                                 | 4.5x10 <sup>-06</sup> | 32                                   | 0.98 | 0.62                                 | 1.01 | 0.56                                   | 1.03    | 3.4x10-05      | 13 |
| 11q22.3  | rs12365612 | g  | a   | 0.9697 | 1.21                               | 8.79E-07 | 0.96                             | 0.63 | 1.03                                | 0.40 | 1.09                                 | 3.0x10 <sup>-04</sup> | 22                                   | 1.04 | 0.71                                 | 0.97 | 0.55                                   | 1.06    | 4.6x10-03      | 33 |
| 6q22.33  | rs6908008  | g  | a   | 0.399  | 1.06                               | 1.97E-06 | 1.07                             | 0.02 | 1.02                                | 0.18 | 1.04                                 | 3.7x10 <sup>-06</sup> | 39                                   | 1.05 | 0.13                                 | -    | -                                      | 1.04    | 1.1x10-06      | 34 |
| 6q22.33  | rs12663110 | c  | t   | 0.3991 | 1.06                               | 2.37E-06 | 1.07                             | 0.03 | 1.01                                | 0.20 | 1.04                                 | 5.4x10 <sup>-06</sup> | 39                                   | 1.05 | 0.15                                 | -    | -                                      | 1.04    | 1.7x10-06      | 34 |
| 11q13.2  | rs3781586  | a  | c   | 0.1551 | 1.08                               | 2.99E-06 | 1.01                             | 0.78 | 1.02                                | 0.14 | 1.05                                 | 4.2x10 <sup>-05</sup> | 27                                   | 0.98 | 0.63                                 | -    | -                                      | 1.04    | 1.1x10-04      | 23 |
| 10q21.3  | rs10822590 | t  | a   | 0.9398 | 1.17                               | 3.79E-06 | 0.98                             | 0.80 | 1.01                                | 0.67 | 1.06                                 | 0.004                 | 40                                   | 1.14 | 0.13                                 | -    | -                                      | 1.06    | 1.6x10-03      | 34 |
| 2p16.2   | rs4233949  | g  | c   | 0.6177 | 1.06                               | 4.59E-06 | 0.98                             | 0.51 | 1.02                                | 0.09 | 1.03                                 | 7.0x10 <sup>-05</sup> | 25                                   | 0.99 | 0.83                                 | 1.03 | 0.30                                   | 1.04    | 5.5x10-07      | 15 |
| 1p34.2   | rs3157     | g  | a   | 0.4542 | 1.06                               | 6.24E-06 | 1.02                             | 0.60 | 1.02                                | 0.10 | 1.03                                 | 2.6x10 <sup>-05</sup> | 0                                    | 0.96 | 0.20                                 | 1.03 | 0.07                                   | 1.03    | 3.3x10-05      | 23 |
| 6q14.1   | rs910679   | t  | c   | 0.4685 | 1.06                               | 6.56E-06 | 1.00                             | 0.98 | 1.00                                | 0.67 | 1.02                                 | 0.009                 | 28                                   | 0.97 | 0.26                                 | 1.01 | 0.70                                   | 1.02    | 0.03           | 5  |
| 14q32.12 | rs2498827  | g  | a   | 0.4384 | 1.06                               | 6.99E-06 | 1.04                             | 0.18 | 1.02                                | 0.09 | 1.04                                 | 8.0x10 <sup>-06</sup> | 9                                    | 1.01 | 0.70                                 | 1.00 | 0.95                                   | 1.03    | 5.4x10-05      | 20 |
| 3q24     | rs11720889 | t  | c   | 0.349  | 1.06                               | 8.06E-06 | 1.00                             | 0.93 | 0.97                                | 0.03 | 1.01                                 | 0.169                 | 42                                   | 0.98 | 0.53                                 | 0.99 | 0.50                                   | 1.01    | 0.42           | 44 |
| 4q22.1   | rs13136331 | t  | c   | 0.3009 | 1.06                               | 1.41E-05 | 1.01                             | 0.67 | 1.01                                | 0.26 | 1.03                                 | 2.2x10 <sup>-04</sup> | 36                                   | 1.03 | 0.39                                 | -    | -                                      | 1.03    | 1.6x10-04      | 29 |
| 16p12.3  | rs7499984  | a  | g   | 0.5952 | 1.06                               | 1.81E-05 | 0.98                             | 0.41 | 0.98                                | 0.13 | 1.01                                 | 0.141                 | 0                                    | 0.98 | 0.49                                 | 1.00 | 0.90                                   | 1.01    | 0.27           | 33 |
| 18p11.21 | rs12955124 | a  | c   | 0.6831 | 1.06                               | 2.03E-05 | 1.01                             | 0.86 | 1.01                                | 0.29 | 1.03                                 | 5.1x10 <sup>-04</sup> | 0                                    | 1.03 | 0.52                                 | -    | -                                      | 1.03    | 4.1x10-04      | 0  |
| 3p26.3   | rs6442271  | g  | a   | 0.0499 | 1.14                               | 3.29E-05 | 1.01                             | 0.84 | 1.00                                | 0.99 | 1.05                                 | 0.009                 | 50                                   | 0.92 | 0.25                                 | 1.11 | 0.06                                   | 1.05    | 5.8x10-03      | 36 |
| 7q11.23  | rs17147106 | g  | a   | 0.9496 | 1.15                               | 3.72E-05 | 1.05                             | 0.51 | 1.01                                | 0.83 | 1.06                                 | 0.004                 | 0                                    | 0.99 | 0.90                                 | 1.01 | 0.76                                   | 1.05    | 0.01           | 9  |

**Table S6D | Previously identified BMD-associated loci with risk of any type of fracture followed for replication in 23andMe and GENOMOS**

| Locus    | SNP       | EA | NEA | EAF  | Discovery                                 |           |                                         |         |                                            |           | Replication                                 |           |                                               |           | COMBINED |           | I <sup>2</sup> | P-value   |
|----------|-----------|----|-----|------|-------------------------------------------|-----------|-----------------------------------------|---------|--------------------------------------------|-----------|---------------------------------------------|-----------|-----------------------------------------------|-----------|----------|-----------|----------------|-----------|
|          |           |    |     |      | OR                                        | P-value   | OR                                      | P-value | OR                                         | P-value   | OR                                          | P-value   | OR                                            | P-value   | OR       | P-value   |                |           |
|          |           |    |     |      | <i>GEFOS 20,439 cases 78,843 controls</i> |           | <i>EPIC 2,926 cases 17,710 controls</i> |         | <i>UKBB 14,492 cases 139,9563 controls</i> |           | <i>GENOMOS 16,573 cases 37,543 controls</i> |           | <i>23andMe 147,200 cases 150,085 controls</i> |           |          |           |                |           |
| 2p16.2   | rs4233949 | G  | C   | 0.62 | 1.06                                      | 4.6x10-06 | 0.98                                    | 0.51    | 1.02                                       | 0.09      | 1.05                                        | 6.5x10-04 | 1.04                                          | 8.9x10-11 | 1.04     | 2.6x10-16 | 15             | 2.6x10-08 |
| 4q22.1   | rs6532023 | G  | T   | 0.66 | 1.03                                      | 0.01      | 1.02                                    | 0.52    | 0.99                                       | 0.54      | 1.08                                        | 5.2x10-07 | 1.03                                          | 7.2x10-06 | 1.03     | 8.9x10-09 | 0              | 1.7x10-08 |
| 7q21.3   | rs4727338 | G  | C   | 0.34 | 1.08                                      | 3.2x10-09 | 1.02                                    | 0.49    | 1.03                                       | 7.3x10-03 | 1.06                                        | 1.1x10-04 | 1.04                                          | 4.6x10-12 | 1.04     | 2.8x10-22 | 32             | 5.9x10-11 |
| 10q21.1  | rs1373004 | T  | G   | 0.11 | 1.06                                      | 2.5x10-03 | 1.09                                    | 0.08    | 1.11                                       | 8.7x10-09 | 1.12                                        | 1.1x10-06 | 1.09                                          | 1.2x10-22 | 1.09     | 1.6x10-36 | 0              | 9.0x10-09 |
| 11q13.2  | rs3736228 | T  | C   | 0.15 | 1.08                                      | 3.4x10-05 | 0.99                                    | 0.89    | 1.03                                       | 0.03      | 1.05                                        | 0.05      | 1.07                                          | 2.8x10-18 | 1.06     | 1.8x10-22 | 0              | 1.4x10-08 |
| 18p11.21 | rs4796995 | G  | A   | 0.37 | 1.09                                      | 5.5x10-10 | 1.05                                    | 0.08    | 1.04                                       | 0.01      | 1.06                                        | 3.9x10-04 | 1.03                                          | 2.9x10-09 | 1.04     | 3.3x10-21 | 9              | 8.8x10-13 |
| 1p36.12  | rs6426749 | G  | C   | 0.83 | 1.09                                      | 4.5x10-07 | 1.07                                    | 0.07    | 1.02                                       | 0.13      | 1.03                                        | 0.14      | 1.02                                          | 3.3x10-3  | 1.03     | 3.2x10-08 | 2              | 3.6x10-06 |
| 1p36.12  | rs7521902 | A  | C   | 0.24 | 1.05                                      | 0.002     | 1.06                                    | 0.10    | 1.03                                       | 0.03      | 1.07                                        | 0.04      | 1.02                                          | 7.2x10-04 | 1.03     | 1.4x10-07 | 0              | 1.4x10-07 |
| 3p22.1   | rs430727  | T  | C   | 0.45 | 0.95                                      | 1.6x10-05 | 0.95                                    | 0.07    | 0.99                                       | 0.43      | 0.94                                        | 2.9x10-04 | 1.03                                          | 1.1x10-08 | 1.03     | 2.2x10-14 | 0              | 2.9x10-07 |
| 7p14.1   | rs6959212 | T  | C   | 0.34 | 1.04                                      | 0.01      | 1.03                                    | 0.31    | 1.04                                       | 2.6x10-04 | 1.05                                        | 9.5x10-04 | 1.02                                          | 1.1x10-05 | 1.03     | 1.4x10-07 | 0              | 7.2x10-05 |
| 7p31.31  | rs3801387 | A  | G   | 0.72 | 1.04                                      | 3.7X10-03 | 1.08                                    | 0.02    | 1.08                                       | 1.9X10-09 | 1.09                                        | 2.4X10-07 | 1.05                                          | 2.0x10-17 | 1.06     | 4.0x10-32 | 0              | 2.7X10-07 |
| 9q34.11  | rs7851693 | G  | C   | 0.36 | 1.06                                      | 7.0x10-05 | 1.04                                    | 0.24    | 1.02                                       | 0.14      | 1.03                                        | 0.09      | 1.05                                          | 4.8x10-16 | 1.04     | 2.1x10-19 | 0              | 3.5x10-05 |
| 11p14.1  | rs163879  | T  | C   | 0.67 | 1.04                                      | 0.01      | 1.01                                    | 0.63    | 1.03                                       | 0.03      | 1.06                                        | 1.7x10-04 | 1.00                                          | 0.50      | 1.02     | 6.2x10-04 | 22             | 3.3x10-05 |
| 14q32.12 | rs1286083 | T  | C   | 0.82 | 0.94                                      | 7.6x10-05 | 0.93                                    | 0.04    | 0.98                                       | 0.24      | 0.96                                        | 0.05      | 1.05                                          | 3.1x10-14 | 1.05     | 2.7x10-18 | 22             | 7.0x10-05 |
| 17p21.31 | rs4792909 | G  | T   | 0.61 | 1.07                                      | 9.7x10-07 | 1.08                                    | 0.01    | 1.05                                       | 2.0x10-05 | 1.07                                        | 9.5x10-03 | 1.04                                          | 2.9x10-12 | 1.05     | 6.6x10-23 | 13             | 8.8x10-13 |
| 17q21.31 | rs227584  | A  | C   | 0.70 | 1.02                                      | 0.08      | 1.03                                    | 0.31    | 1.06                                       | 6.7x10-06 | 1.04                                        | 0.01      | 1.03                                          | 8.2x10-06 | 1.04     | 2.2x10-11 | 16             | 4.1x10-05 |

**Table S6E | Fracture SNPs in association with FN-BMD and LS-BMD**

| Locus    | SNP        | EA | NEA | EAF  | FN-BMD |      |           | LS-BMD |      |            |
|----------|------------|----|-----|------|--------|------|-----------|--------|------|------------|
|          |            |    |     |      | Beta   | se   | p-value   | Beta   | se   | p-value    |
| 2p16.2   | rs4233949  | c  | g   | 0.38 | 0.03   | 0.01 | 1.5x10-04 | 0.06   | 0.01 | 5.0x10-12  |
| 3p22.1   | rs430727   | t  | c   | 0.48 | -0.07  | 0.01 | 9.7x10-17 | -0.06  | 0.01 | 2.9x10-09  |
| 6q22.33  | rs10457487 | a  | c   | 0.49 | 0.02   | 0.01 | 4.1x10-03 | 0.02   | 0.01 | 6.0x10-02  |
| 6q25.1   | rs2982570  | t  | c   | 0.42 | 0.06   | 0.01 | 7.5x10-14 | 0.07   | 0.01 | 2.21x10-14 |
| 7p12.1   | rs1548607  | a  | g   | 0.70 | 0.02   | 0.01 | 5.9x10-02 | 0.05   | 0.01 | 7.5x10-05  |
| 7p14.1   | rs6959212  | t  | c   | 0.32 | -0.03  | 0.01 | 6.4x10-04 | -0.08  | 0.01 | 6.9x10-17  |
| 7q21.3   | rs6465508  | a  | g   | 0.67 | 0.08   | 0.01 | 5.1x10-20 | 0.07   | 0.01 | 1.6x10-15  |
| 7q31.31  | rs2908007  | a  | g   | 0.61 | -0.05  | 0.01 | 2.9x10-07 | -0.04  | 0.01 | 2.2x10-05  |
| 9q34.11  | rs7851693  | c  | g   | 0.64 | 0.05   | 0.01 | 3.1x10-08 | 0.02   | 0.01 | 5.8x10-02  |
| 10q21.1  | rs11003047 | t  | g   | 0.89 | 0.06   | 0.01 | 7.4x10-06 | 0.07   | 0.01 | 1.2x10-07  |
| 11q13.2  | rs3736228  | t  | c   | 0.16 | -0.05  | 0.01 | 1.8x10-06 | -0.08  | 0.01 | 1.6x10-11  |
| 14q32.12 | rs1286083  | t  | c   | 0.81 | -0.06  | 0.01 | 2.9x10-08 | -0.07  | 0.01 | 1.7x10-11  |
| 17q21.31 | rs2741856  | c  | g   | 0.08 | 0.09   | 0.02 | 4.7x10-08 | 0.10   | 0.02 | 3.0x10-08  |
| 18p11.21 | rs4635400  | a  | g   | 0.37 | -0.04  | 0.01 | 4.7x10-06 | -0.03  | 0.01 | 6.4x10-04  |
| 21q22.2  | rs9980072  | a  | g   | 0.26 | 0.02   | 0.01 | 1.0x10-02 | 0.04   | 0.01 | 1.4x10-04  |

**Table S7 | Estimates of the Genetic Correlation Between Other Clinical Risk Factors and BMD**

| Trait or Disease*          | FN BMD |      |               | LS BMD |      |               |
|----------------------------|--------|------|---------------|--------|------|---------------|
|                            | rg     | se   | p             | rg     | se   | p             |
| Age at Menopause           | 0.05   | 0.05 | 0.33          | 0.04   | 0.05 | 0.44          |
| Rheumatoid Arthritis       | -0.03  | 0.04 | 0.56          | -0.12  | 0.05 | 0.01          |
| Inflammatory Bowel Disease | -0.08  | 0.05 | 0.07          | -0.07  | 0.05 | 0.18          |
| Homocysteine levels        | -0.10  | 0.07 | 0.08          | -0.07  | 0.06 | 0.29          |
| Grip Strength              | 0.11   | 0.00 | <b>0.006</b>  | 0.15   | 0.04 | <b>0.0001</b> |
| Age of puberty             | -0.08  | 0.03 | 0.03          | -0.06  | 0.03 | 0.06          |
| Fasting Glucose            | 0.15   | 0.07 | 0.03          | 0.14   | 0.07 | 0.03          |
| Coronary Heart Disease     | 0.04   | 0.06 | 0.47          | 0.05   | 0.06 | 0.44          |
| Type 2 Diabetes            | 0.20   | 0.06 | <b>0.0005</b> | 0.15   | 0.06 | 0.01          |
| Vitamin D levels           | 0.07   | 0.27 | 0.79          | -0.04  | 0.26 | 0.87          |

Genome-wide data was not available for Thyroid levels, Type 1 Diabetes and Milk Calcium Intake

**Table S8 | Estimating the effect of 15 Fracture Related Risk Factors on Fracture Risk**

| Trait or Disease                      | Unit<br>OR per   | IVW fixed meta-analysis |           | Weighted Median   |           | Penalised Weighted Median |           |
|---------------------------------------|------------------|-------------------------|-----------|-------------------|-----------|---------------------------|-----------|
|                                       |                  | OR (95%CI)              | P-value   | OR (95%CI)        | P-value   | OR (95%CI)                | P-value   |
| Decreased Femoral Neck BMD            | SD               | 1.55 (1.48, 1.63)       | 1.5x10-68 | 1.53 (1.40, 1.68) | 1.8x10-20 | 1.54 (1.40-1.69)          | 1.1x10-19 |
| Decreased Lumbar Spine BMD            | SD               | 1.43 (1.37, 1.50)       | 2.3x10-55 | 1.30 (1.19, 1.43) | 2.6x10-08 | 1.36 (1.23-1.49)          | 8.7x10-10 |
| Earlier Menopause                     | SD               | 1.10 (1.00, 1.21)       | 0.05      | 1.14 (0.99, 1.32) | 0.07      | 1.14 (0.99-1.31)          | 0.08      |
| Rheumatoid Arthritis *                | OR               | 1.02 (0.99, 1.04)       | 0.14      | 1.01 (0.97, 1.05) | 0.72      | 1.01 (0.97, 1.04)         | 0.67      |
| Type 1 Diabetes *                     | OR               | 1.00 (0.99, 1.02)       | 0.57      | 1.00 (0.98, 1.02) | 0.98      | 1.00 (0.98-1.02)          | 0.98      |
| Inflammatory Bowel Disease *          | OR               | 1.00 (0.99, 1.01)       | 0.92      | 1.00 (0.98, 1.03) | 0.66      | 1.00 (0.98, 1.03)         | 0.67      |
| Decreased Thyroid-stimulating hormone | SD               | 0.99 (0.94, 1.04)       | 0.78      | 1.00 (0.93, 1.08) | 0.96      | 1.00 (0.93-1.08)          | 0.90      |
| Increased Homocysteine                | SD               | 0.98 (0.92,1.05)        | 0.6       | 0.94 (0.85,1.03)  | 0.17      | 0.94 (0.85,1.03)          | 0.17      |
| Decreased Grip Strength               | SD               | 2.14 (1.13, 4.04)       | 0.01      | 2.41 (1.13, 5.14) | 0.02      | 3.00 (1.37, 6.57)         | 0.006     |
| Late Puberty                          | SD               | 1.06 (1.00, 1.13)       | 0.04      | 1.03 (0.94-1.14)  | 0.43      | 1.03 (0.94-1.13)          | 0.46      |
| Increased Fasting Glucose             | SD               | 1.04 (0.97, 1.12)       | 0.24      | 1.11 (1.01-1.23)  | 0.03      | 1.12 (1.01-1.23)          | 0.03      |
| Coronary Heart Disease *              | OR               | 1.01 (0.97, 1.05)       | 0.76      | 1.00 (0.94, 1.06) | 0.99      | 1.00 (0.94, 1.06)         | 0.93      |
| Type 2 Diabetes *                     | OR               | 0.99 (0.96, 1.01)       | 0.37      | 1.00 (0.94, 1.06) | 0.99      | 1.00 (0.94, 1.06)         | 0.93      |
| Decreased Vitamin D                   | SD               | 0.84 (0.70, 1.02)       | 0.07      | 0.82 (0.65, 1.04) | 0.11      | 0.82 (0.65, 1.04)         | 0.11      |
| Decreased Milk Calcium Intake         | Servings per day | 1.01 (0.80-1.23 )       | 0.94      | NA                | NA        | N/A                       | N/A       |

\*SD=standard deviation; OR=odd ratio; IVW = inverse-variance weighted

**Table S9 | Associations of different risk factors with bone mineral density**

| Trait or Disease                      | Scale of beta SD of BMD per | Femoral Neck BMD              |               |                              |             | Lumbar Spine BMD               |             |                              |             |
|---------------------------------------|-----------------------------|-------------------------------|---------------|------------------------------|-------------|--------------------------------|-------------|------------------------------|-------------|
|                                       |                             | Inverse Variance-Weighted MR  |               | MR-Egger Regression          |             | Inverse Variance-Weighted MR   |             | MR-Egger Regression          |             |
|                                       |                             | Effect Estimate (95%CI)       | P             | Intercept (95%CI)            | P           | Effect Estimate (95%CI)        | P           | Intercept (95%CI)            | P           |
| Earlier Menopause                     | year                        | -0.063 (-0.080, -0.047)       | 0.038         | 0.003 (-0.003, 0.009)        | 0.28        | -0.018 (-0.033, -0.004)        | 0.01        | -0.002 (-0.009, 0.004)       | 0.48        |
| Rheumatoid Arthritis                  | log (OR)                    | 0.012 (-0.009, 0.034)         | 0.263         | -0.004 (-0.010, 0.002)       | 0.22        | 0.025 (0.000, 0.051)           | 0.05        | -0.009 (-0.016, -0.001)      | 0.02        |
| Type 1 Diabetes                       | log (OR)                    | 0.003 (-0.008, 0.014)         | 0.589         | 0.002 (-0.004, 0.007)        | 0.57        | 0.008 (-0.006, 0.021)          | 0.26        | 0.002 (-0.005, 0.009)        | 0.59        |
| Inflammatory Bowel Disease            | log (OR)                    | -0.009 (-0.021, 0.002)        | 0.104         | -0.001 (-0.004, 0.001)       | 0.31        | 0.002 (-0.011, 0.016)          | 0.72        | 0.001 (-0.003, 0.004)        | 0.66        |
| Decreased Thyroid-Stimulating Hormone | SD                          | 0.003 (-0.050, 0.055)         | 0.924         | -0.009 (-0.026, 0.008)       | 0.29        | -0.034 (-0.096, 0.027)         | 0.28        | -0.017 (-0.037, 0.002)       | 0.08        |
| Increased Homocysteine                | SD                          | -0.044(-0.136, -0.048)        | 0.035         | 0.003(-0.017,0.025)          | 0.66        | -0.021(-0.127,0.085)           | 0.69        | -0.013(-0.038,0.012)         | 0.24        |
| Decreased Grip Strength               | kilogram(kg)                | 0.019 (-0.012, 0.050)         | 0.229         | -0.006 (-0.037, 0.025)       | 0.73        | 0.040 (-0.005, 0.085)          | 0.09        | -0.019 (-0.064, 0.026)       | 0.40        |
| <b>Age of puberty</b>                 | <b>year</b>                 | <b>-0.071 (-0.109, 0.034)</b> | <b>0.0002</b> | <b>0.003 (-0.003, 0.008)</b> | <b>0.33</b> | <b>-0.013 (-0.025, -0.001)</b> | <b>0.04</b> | <b>0.003 (-0.003, 0.009)</b> | <b>0.28</b> |
| Increased Fasting Glucose             | mmol/l                      | 0.150 (0.047, 0.253)          | 0.004         | 0.004 (-0.002, 0.009)        | 0.21        | 0.089 (-0.031, 0.209)          | 0.15        | 0.003 (-0.004, 0.009)        | 0.39        |
| Coronary Heart Disease                | Log (OR)                    | 0.002 (-0.04, 0.045)          | 0.913         | 0.002 (-0.009, 0.013)        | 0.71        | 0.002 (-0.040, 0.045)          | 0.91        | 0.002 (-0.009, 0.013)        | 0.71        |
| Type 2 Diabetes                       | Log (OR)                    | 0.030 (0.005, 0.055)          | 0.020         | 0.001 (-0.006, 0.008)        | 0.85        | 0.014 (-0.015, 0.043)          | 0.36        | 0.005 (-0.003, 0.013)        | 0.22        |
| Decreased Vitamin D                   | SD                          | -0.098 (-0.271, 0.075)        | 0.268         | 0.040 (-0.040, 0.120)        | 0.17        | -0.004 (-0.206, 0.197)         | 0.97        | -0.01 (-0.104, 0.083)        | 0.68        |
| Calcium Milk Intake                   | Serving/day                 | -0.012 (-0.149, 0.126)        | 0.86          | N/A                          | N/A         | 0.023 (-0.164, 0.209 )         | 0.81        | N/A                          | N/A         |

One BMI SNP (rs1201687) was not present in GEFOS seq. As a proxy rs9581855 was used ( $r^2=1$ , 1000G phase 1); Five homocysteine SNPs were not present in GEFOS seq and no proxies were found; \*SD=standard deviation; N/A : not applicable

### III. Supplementary figures

**Supplementary Figure 1:** Description of study design

**Supplementary Figure 2:** Regional association plots of top signals



## Supplementary Figure 1 | Description of study design

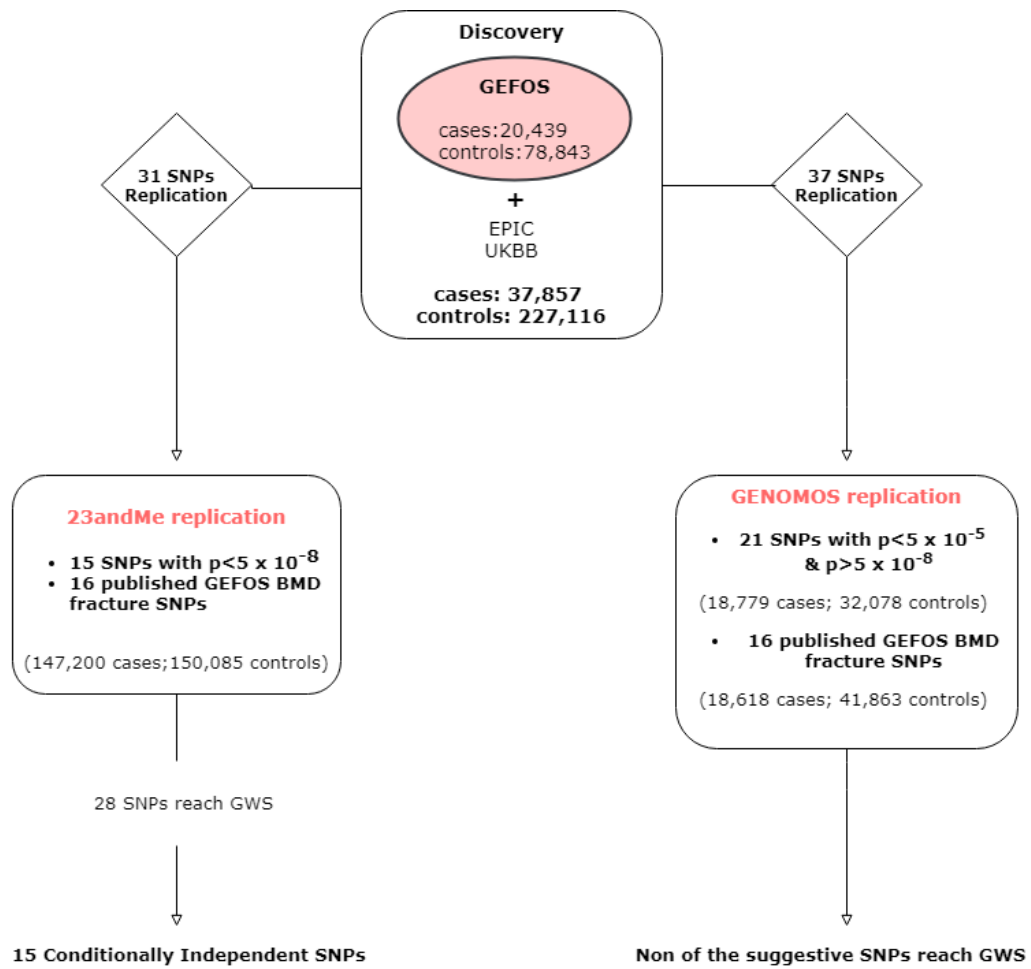

**Supplementary Figure 2** | Regional association plots of top signals (A. 2p16.2 B. 3p22.1 C. 6q22.33, D. 6q31.31, E. 7q31.31, F. 7q21.3, G. 7q14.1, , H. 7q12.1, I. 9q34.11, J. 10q21.31, K. 11q13.2, L. 14q32.2, M. 17q21.31, N. 18q11.21, O. 21q22.2). SNPs are plotted by position in 500kb window against association with fracture risk ( $-\log_{10} P$ ). Plot highlighting the most significant SNPs in discovery fracture meta-analysis.

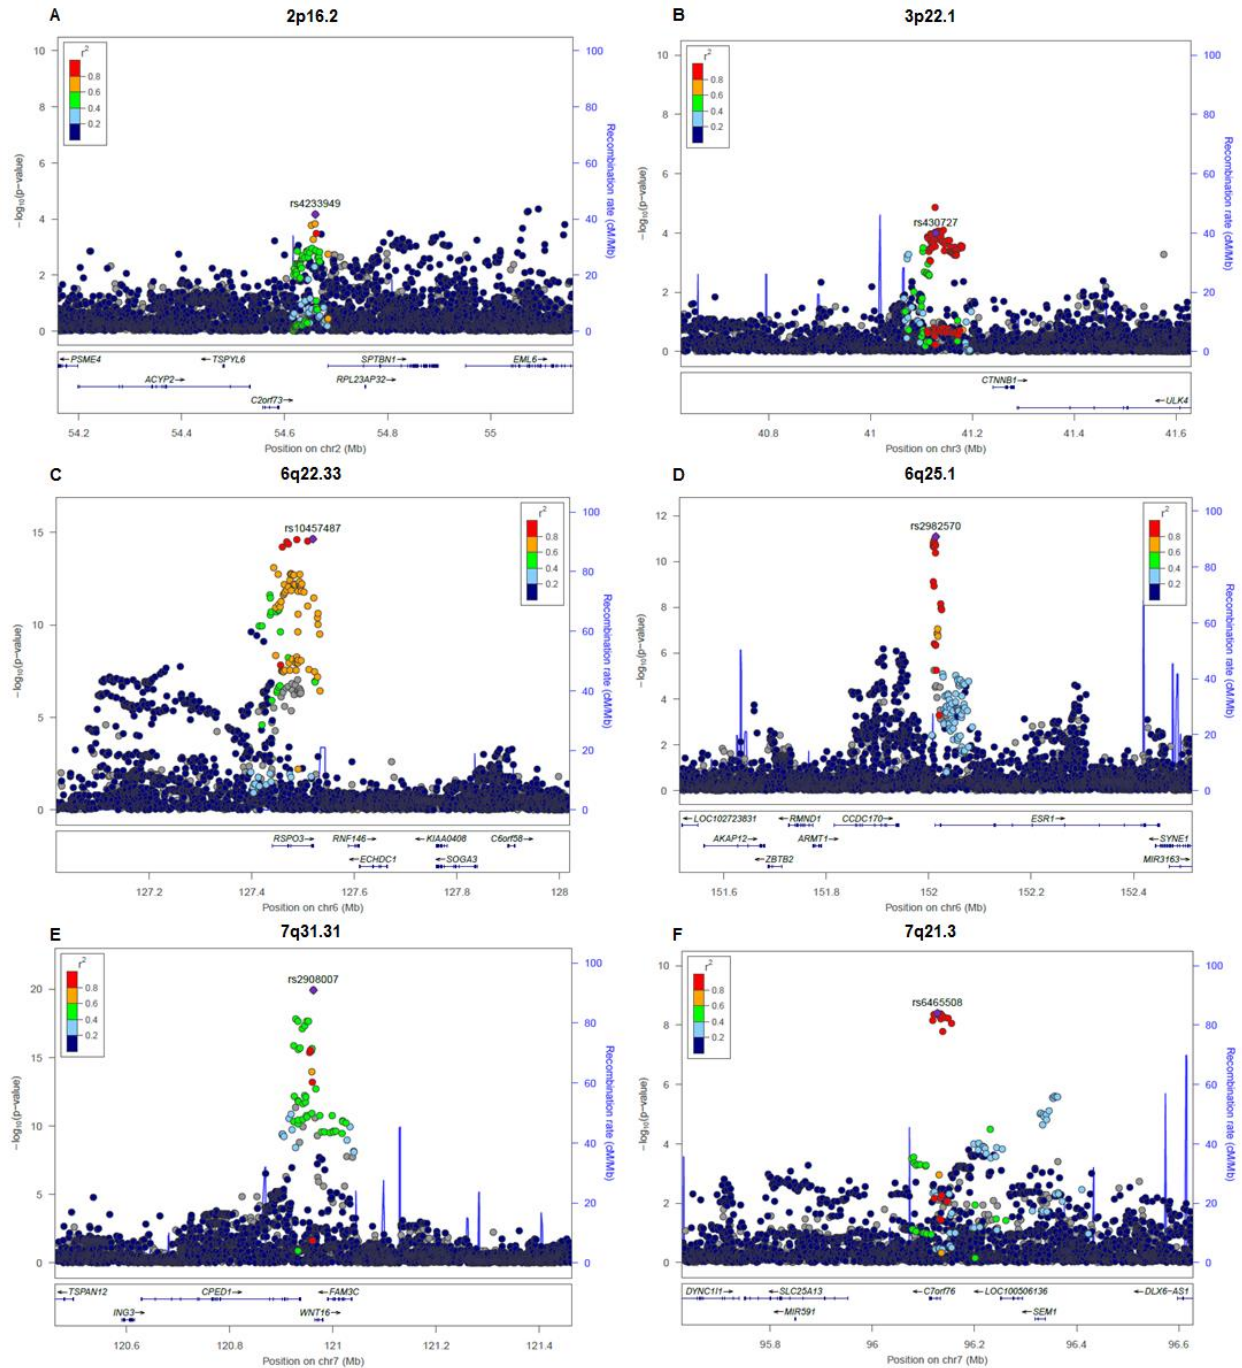

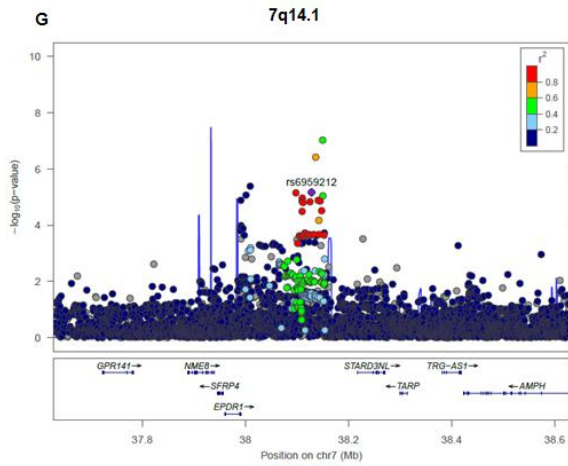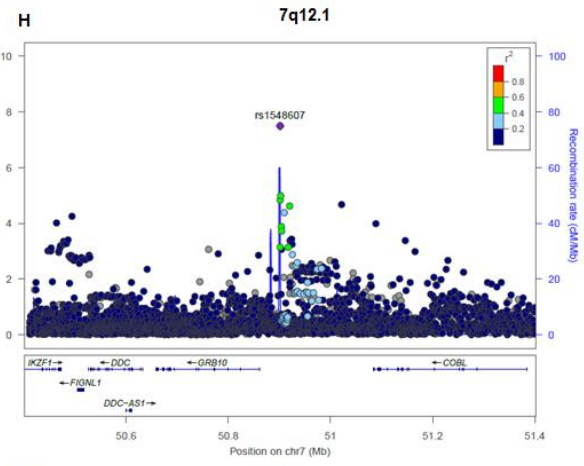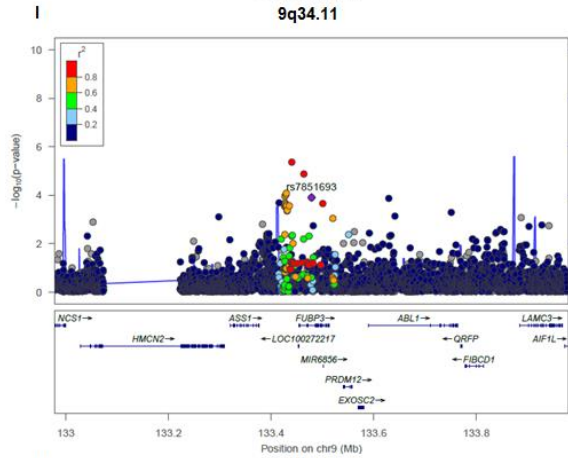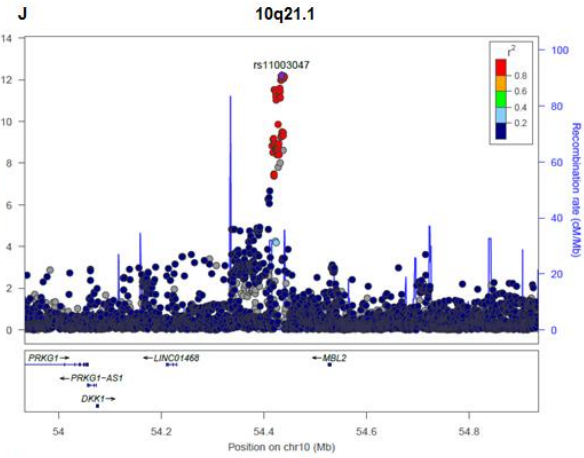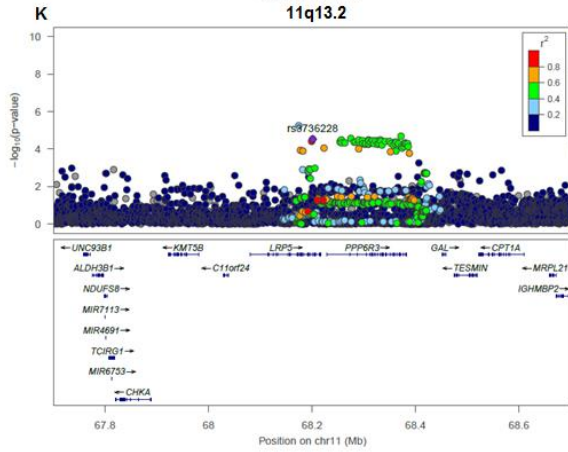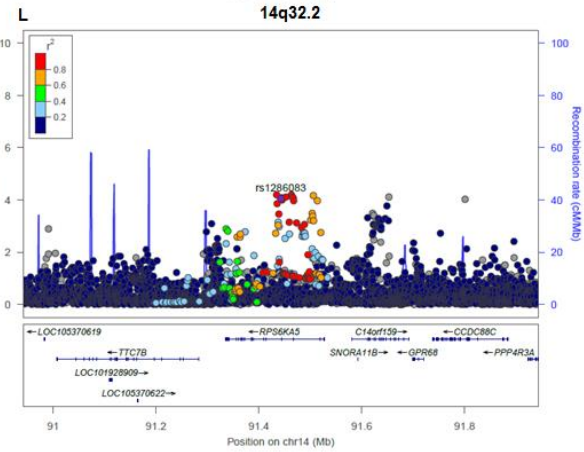

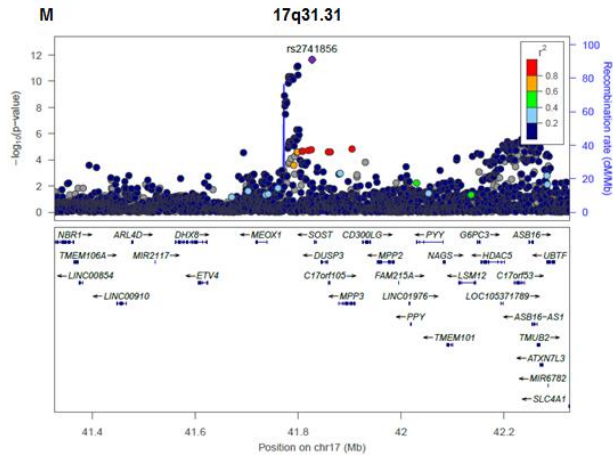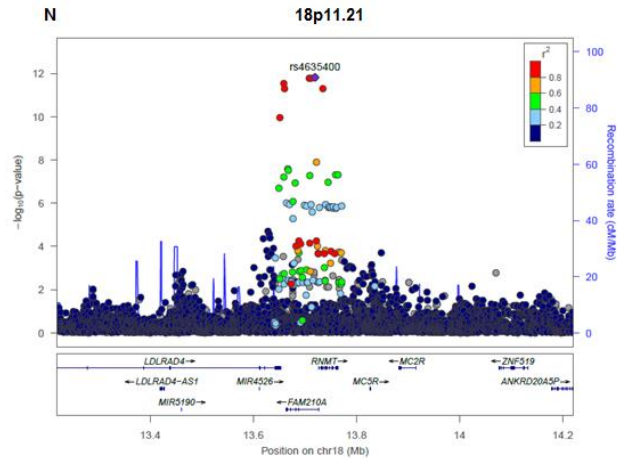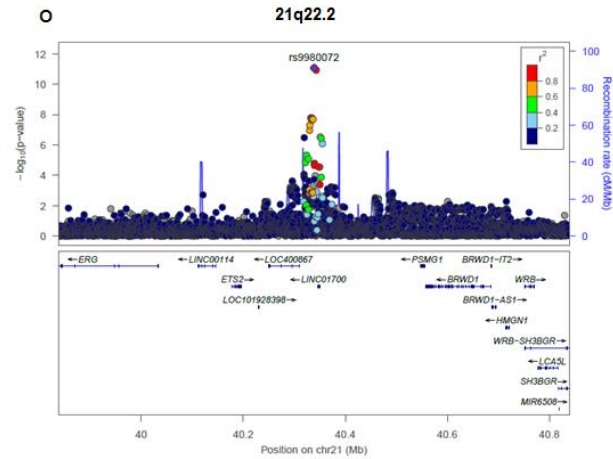

## IV. Full acknowledgements

| Cohort        | Funding agencies                                                                                                                                                                                                                                                                                                                                                                                                                                                                                                                                                                                                                                                                                                                                                                                                                                                                                                                                                                                                                                                                                                                                                                                                                                                                                                | Full Acknowledgments                                                                                                                                                                                                                                                                                                                                                                                                                                                                                                                                                                                                                                                                                                                                                                                                                                                                                                                                                                                                                                                                                                                                                                                                                                                                                                                                                                                                                                                                                                                                                                                                                                                                                                                                                                                                                                                                                                                                                                                                                                                                                                                                                                                                                                                                                                                                                                                                                                                                                                                                                                                                                                                                                                                                                                                                                                                                                                                     |
|---------------|-----------------------------------------------------------------------------------------------------------------------------------------------------------------------------------------------------------------------------------------------------------------------------------------------------------------------------------------------------------------------------------------------------------------------------------------------------------------------------------------------------------------------------------------------------------------------------------------------------------------------------------------------------------------------------------------------------------------------------------------------------------------------------------------------------------------------------------------------------------------------------------------------------------------------------------------------------------------------------------------------------------------------------------------------------------------------------------------------------------------------------------------------------------------------------------------------------------------------------------------------------------------------------------------------------------------|------------------------------------------------------------------------------------------------------------------------------------------------------------------------------------------------------------------------------------------------------------------------------------------------------------------------------------------------------------------------------------------------------------------------------------------------------------------------------------------------------------------------------------------------------------------------------------------------------------------------------------------------------------------------------------------------------------------------------------------------------------------------------------------------------------------------------------------------------------------------------------------------------------------------------------------------------------------------------------------------------------------------------------------------------------------------------------------------------------------------------------------------------------------------------------------------------------------------------------------------------------------------------------------------------------------------------------------------------------------------------------------------------------------------------------------------------------------------------------------------------------------------------------------------------------------------------------------------------------------------------------------------------------------------------------------------------------------------------------------------------------------------------------------------------------------------------------------------------------------------------------------------------------------------------------------------------------------------------------------------------------------------------------------------------------------------------------------------------------------------------------------------------------------------------------------------------------------------------------------------------------------------------------------------------------------------------------------------------------------------------------------------------------------------------------------------------------------------------------------------------------------------------------------------------------------------------------------------------------------------------------------------------------------------------------------------------------------------------------------------------------------------------------------------------------------------------------------------------------------------------------------------------------------------------------------|
| <b>AGES</b>   | NIH contract N01-AG-12100, the NIA Intramural Research Program, Hjartavernd (the Icelandic Heart Association), and the Althingi (the Icelandic Parliament). Icelandic Heart Association .                                                                                                                                                                                                                                                                                                                                                                                                                                                                                                                                                                                                                                                                                                                                                                                                                                                                                                                                                                                                                                                                                                                       | The Age, Gene/Environment Susceptibility Reykjavik Study has been funded by NIH contract N01-AG-12100, the NIA Intramural Research Program, Hjartavernd (the Icelandic Heart Association), and the Althingi (the Icelandic Parliament). The Fracture Registry is funded by the Icelandic Heart Association .                                                                                                                                                                                                                                                                                                                                                                                                                                                                                                                                                                                                                                                                                                                                                                                                                                                                                                                                                                                                                                                                                                                                                                                                                                                                                                                                                                                                                                                                                                                                                                                                                                                                                                                                                                                                                                                                                                                                                                                                                                                                                                                                                                                                                                                                                                                                                                                                                                                                                                                                                                                                                             |
| <b>AOGC</b>   | National Health and Medical Research Council (Australia) (grant reference 511132). Australian Cancer Research Foundation and Rebecca Cooper Foundation (Australia). National Health and Medical Research Council (Australia). National Health and Medical Research Council (Australia) Career Development Award (569807). Medical Research Council New Investigator Award (MRC G0800582). Health Research Council of New Zealand. Sanofi-Aventis, Eli Lilly, Novartis, Pfizer, Proctor&Gamble Pharmaceuticals and Roche. National Health and Medical Research Council, Australia. Australian National Health and Medical Research Council, MBF Living Well foundation, the Ernst Heine Family Foundation and from untied educational grants from Amgen, Eli Lilly International, GE-Lunar, Merck Australia, Novartis, Sanofi-Aventis Australia and Servier. Medical research Council UK & Arthritis Research UK. The Victorian Health Promotion Foundation and the Geelong Region Medical Research Foundation, and the National Health and Medical Research Council, Australia (project grant 628582). Action Research UK. David M Evans is supported by an Australian Research Council Future Fellowship (FT130101709). This work was supported by a Medical Research Council Programme Grant (MC_UU_12013/4). | We would like to thank all participants who provided DNA and clinical information for the AOGC. The AOGC was funded by the Australian National Health and Medical Research Council (Australia) (grant reference 511132). Funding was also received from the Australian Cancer Research Foundation and Rebecca Cooper Foundation (Australia). MAB is funded by a National Health and Medical Research Council (Australia) Principal Research Fellowship and ELD is funded by a National Health and Medical Research Council (Australia) Career Development Award (569807). DME is supported by a Medical Research Council New Investigator Award (MRC G0800582) and JPK is funded by a Wellcome Trust PhD studentship (WT083431MA). IR is supported by the Health Research Council of New Zealand. The Sydney Twin Study and Tasmanian Older Adult Cohort were supported by the National Health and Medical Research Council, Australia. The help of Dr Joanna Makovey from the Sydney Twin Study is gratefully acknowledged. The Dubbo Osteoporosis Epidemiology Study was supported by the Australian National Health and Medical Research Council, MBF Living Well foundation, the Ernst Heine Family Foundation and from untied educational grants from Amgen, Eli Lilly International, GE-Lunar, Merck Australia, Novartis, Sanofi-Aventis Australia and Servier. The contribution from A/Prof Jacqueline R Center, A/Prof Tuan V Nguyen, Mr Sing C Nguyen, Ms Denia Mang, and Ms Ruth Toppler is gratefully acknowledged. The OPUS study was supported by Sanofi-Aventis, Eli Lilly, Novartis, Pfizer, Proctor&Gamble Pharmaceuticals and Roche. We thank the co-principal investigators from OPUS (Dr Christian Roux, Dr David Reid, Dr Claus Glüer, and Dr Dieter Felsenber); Ms Judith Finigan and Ms Selina Simpson. The assistance of Ms Fatma Gossiel (Sheffield) is gratefully acknowledged. The Hertfordshire Cohort Study was supported by grants from the Medical research Council UK & Arthritis Research UK. We thank the men and women who participated; Prof Cyrus Cooper; and the Herfordshire GPs who supported the study. The Oxford Osteoporosis Study was funded by Action Research, UK. The AOGC thanks the research nurses involved in this study (Ms Barbara Mason and Ms Amanda Horne (Auckland), Ms Linda Bradbury and Ms Kate Lowings (Brisbane), Ms Katherine Kolk and Ms Rumbidzai Tichawangana (Geelong); Ms Helen Steane (Hobart); Ms Jemma Christie (Melbourne); and Ms Janelle Rampellini (Perth)). The AOGC also acknowledges gratefully technical support from Ms Kathryn Addison, Ms Marieke Brugmans, Ms Catherine Cremen, Ms Johanna Hadler, and Ms Karena Pryce. ). Finally, we further want to acknowledge AOGC principal investigators Eugene McCloskey, Geoffrey C Nicholson, Richard Eastell, Richard L Prince, John A Eisman, Graeme Jones, Ian R Reid, Elaine M Dennison, and John Wark. |
| <b>BPROOF</b> | This study is supported and funded so far by The Netherlands Organization for Health Research and Development (ZonMw, Grant 6130.0031), the Hague; unrestricted grant from NZO (Dutch Dairy Association), Zoetermeer; Orthica, Almere; NCHA (Netherlands Consortium Healthy Ageing) Leiden/Rotterdam; Ministry of Economic Affairs, Agriculture and Innovation (project KB-15-004-003), the Hague; Wageningen University, Wageningen; VUmc, Amsterdam; Erasmus Medical Center, Rotterdam.                                                                                                                                                                                                                                                                                                                                                                                                                                                                                                                                                                                                                                                                                                                                                                                                                       | We thank the participants of the B-PROOF study for their enthusiasm and cooperation. Furthermore, we thank the dedicated research team that is conducting the study.                                                                                                                                                                                                                                                                                                                                                                                                                                                                                                                                                                                                                                                                                                                                                                                                                                                                                                                                                                                                                                                                                                                                                                                                                                                                                                                                                                                                                                                                                                                                                                                                                                                                                                                                                                                                                                                                                                                                                                                                                                                                                                                                                                                                                                                                                                                                                                                                                                                                                                                                                                                                                                                                                                                                                                     |

| Cohort                                                              | Funding agencies                                                                                                                                                                                                                                                                                                                                                                                                                                                                                                                                                                                                                                                                                                                                                                                        | Full Acknowledgments                                                                                                                                                                                                                                                                                                                                                                                                                                                                                                                                                                                                                                                                                                                                                                                                                                                                                                                                                                                                                                                                                                                 |
|---------------------------------------------------------------------|---------------------------------------------------------------------------------------------------------------------------------------------------------------------------------------------------------------------------------------------------------------------------------------------------------------------------------------------------------------------------------------------------------------------------------------------------------------------------------------------------------------------------------------------------------------------------------------------------------------------------------------------------------------------------------------------------------------------------------------------------------------------------------------------------------|--------------------------------------------------------------------------------------------------------------------------------------------------------------------------------------------------------------------------------------------------------------------------------------------------------------------------------------------------------------------------------------------------------------------------------------------------------------------------------------------------------------------------------------------------------------------------------------------------------------------------------------------------------------------------------------------------------------------------------------------------------------------------------------------------------------------------------------------------------------------------------------------------------------------------------------------------------------------------------------------------------------------------------------------------------------------------------------------------------------------------------------|
| <b>CHS</b>                                                          | National Heart Lung and Blood Institute (NHLBI) contracts HHSN268201200036C, HHSN268200800007C, N01HC55222, N01HC85079, N01HC85080, N01HC85081, N01HC85082, N01HC85083, N01HC85086; and NHLBI grants U01HL080295, R01HL087652, R01HL105756, R01HL103612, R01HL120393, and R01HL130114 with additional contribution from the National Institute of Neurological Disorders and Stroke (NINDS). Additional support was provided through R01AG023629 from the National Institute on Aging (NIA). Genotyping supported in part by the National Center for Advancing Translational Sciences, CTSI grant UL1TR000124, and the National Institute of Diabetes and Digestive and Kidney Disease Diabetes Research Center (DRC) grant DK063491 to the Southern California Diabetes Endocrinology Research Center. | Cardiovascular Health Study: This CHS research was supported by NHLBI contracts HHSN268201200036C, HHSN268200800007C, N01HC55222, N01HC85079, N01HC85080, N01HC85081, N01HC85082, N01HC85083, N01HC85086; and NHLBI grants U01HL080295, R01HL087652, R01HL105756, R01HL103612, R01HL120393, and R01HL130114 with additional contribution from the National Institute of Neurological Disorders and Stroke (NINDS). Additional support was provided through R01AG023629 from the National Institute on Aging (NIA). A full list of principal CHS investigators and institutions can be found at CHS-NHLBI.org. The provision of genotyping data was supported in part by the National Center for Advancing Translational Sciences, CTSI grant UL1TR000124, and the National Institute of Diabetes and Digestive and Kidney Disease Diabetes Research Center (DRC) grant DK063491 to the Southern California Diabetes Endocrinology Research Center. The content is solely the responsibility of the authors and does not necessarily represent the official views of the National Institutes of Health.                               |
| <b>deCODE</b>                                                       | deCODE Genetics                                                                                                                                                                                                                                                                                                                                                                                                                                                                                                                                                                                                                                                                                                                                                                                         | Funded by deCODE Genetics. We wish to thank the study volunteers for their contributions to this project, and the staff at the deCODE core facilities.                                                                                                                                                                                                                                                                                                                                                                                                                                                                                                                                                                                                                                                                                                                                                                                                                                                                                                                                                                               |
| <b>EGCUT</b>                                                        | This study was supported by EU H2020 grants 692145, 676550, 654248, Estonian Research Council Grant IUT20-60, NIASC and EIT – Health and EU through the European Regional Development Fund (Project No. 2014-2020.4.01.15-0012 GENTRANSMED).                                                                                                                                                                                                                                                                                                                                                                                                                                                                                                                                                            | EGC authors want to acknowledge EGCUT personnel, especially Mr. Steven Smit. The genotyping of the EGCUT samples were performed in Estonian Biocentre Genotyping Core Facility, EGC authors want to acknowledge Mr. Viljo Soo for their contribution in that. EGCUT data analyzes were carried out in part in the High Performance Computing Center of University of Tartu.                                                                                                                                                                                                                                                                                                                                                                                                                                                                                                                                                                                                                                                                                                                                                          |
| <b>EPIC-Norfolk</b>                                                 | The UK's NIMR Biomedical Research Centre Grant. Cancer Research Campaign; Medical Research Council; Stroke Association; British Heart Foundation; Department of Health; Europe Against Cancer Programme Commission of the European Union and the Ministry of Agriculture, Fisheries and Food.                                                                                                                                                                                                                                                                                                                                                                                                                                                                                                           | The UK's NIMR Biomedical Research Centre Grant to Cambridge contributed to the costs of genotyping. EPIC-Norfolk is funded by Cancer Research Campaign; Medical Research Council; Stroke Association; British Heart Foundation; Department of Health; Europe Against Cancer Programme Commission of the European Union and the Ministry of Agriculture, Fisheries and Food. The funders had no role in study design, data collection and analysis, decision to publish, or preparation of the manuscript. EPIC-Norfolk is funded by Cancer Research Campaign; Medical Research Council; Stroke Association; British Heart Foundation; Department of Health; Europe Against Cancer Programme Commission of the European Union and the Ministry of Agriculture, Fisheries and Food. The UK's NIMR Biomedical Research Centre Grant to Cambridge contributed to the costs of genotyping. We thank in particular Mrs N Dalzell for coordination and DXA data collection, Robert Luben for data management, Serena Scollen and Alison Dunning for genotyping in GENOMOS, and Matt Sims and Steve Knighton for managing the EPIC DNA bank. |
| <b>ERF</b>                                                          | Netherlands Organisation for Scientific Research (NWO), Erasmus university medical center, the Centre for Medical Systems Biology (CMSB1 and CMSB2) of the Netherlands Genomics Initiative (NGI).                                                                                                                                                                                                                                                                                                                                                                                                                                                                                                                                                                                                       | The ERF study was supported by grants from the Netherlands Organisation for Scientific Research (NWO), Erasmus university medical center, the Centre for Medical Systems Biology (CMSB1 and CMSB2) of the Netherlands Genomics Initiative (NGI). We are grateful to all individuals and their relatives and general practitioners for their contributions and Jeannette Vergeer for the supervision of the laboratory work.                                                                                                                                                                                                                                                                                                                                                                                                                                                                                                                                                                                                                                                                                                          |
| <b>Framingham Study Original Cohort, Framingham Offspring Study</b> | National Institute for Arthritis, Musculoskeletal and Skin Diseases and National Institute on Aging (R01 AR/AG 41398; DPK and R01 AR 050066; DK National Heart, Lung, and Blood Institute's Framingham Heart Study (N01-HC-25195) and its contract with Affymetrix, Inc. for genotyping services (N02-HL-6-4278).                                                                                                                                                                                                                                                                                                                                                                                                                                                                                       | The study was funded by grants from the US National Institute for Arthritis, Musculoskeletal and Skin Diseases and National Institute on Aging (R01 AR 41398; DPK and R01 AR 050066; DK). The Framingham Heart Study of the National Heart, Lung, and Blood Institute of the National Institutes of Health and Boston University School of Medicine were supported by the National Heart, Lung, and Blood Institute's Framingham Heart Study (N01-HC-25195) and its contract with Affymetrix, Inc. for genotyping services (N02-HL-6-4278). Analyses reflect intellectual input and resource development from the Framingham Heart Study investigators participating in the SNP Health Association Resource (SHARe) project. A portion of this research was conducted using the Linux Cluster for Genetic Analysis (LinGA-II) funded by the Robert Dawson Evans Endowment of the Department of Medicine at Boston University School of Medicine and Boston Medical Center.                                                                                                                                                           |



| Cohort                     | Funding agencies                                                                                                                                                                                                                                                                                                                                                                                                                                                                                                                | Full Acknowledgments                                                                                                                                                                                                                                                                                                                                                                                                                                                                                                                                                                                                                                                                                                                                                                                                                                                                                                                                                                                                                                                                                                                                                                                 |
|----------------------------|---------------------------------------------------------------------------------------------------------------------------------------------------------------------------------------------------------------------------------------------------------------------------------------------------------------------------------------------------------------------------------------------------------------------------------------------------------------------------------------------------------------------------------|------------------------------------------------------------------------------------------------------------------------------------------------------------------------------------------------------------------------------------------------------------------------------------------------------------------------------------------------------------------------------------------------------------------------------------------------------------------------------------------------------------------------------------------------------------------------------------------------------------------------------------------------------------------------------------------------------------------------------------------------------------------------------------------------------------------------------------------------------------------------------------------------------------------------------------------------------------------------------------------------------------------------------------------------------------------------------------------------------------------------------------------------------------------------------------------------------|
| <b>GOOD</b>                | Swedish Research Council (K2010-54X-09894-19-3, 2006-3832 and K2010-52X-20229-05-3), the Swedish Foundation for Strategic Research, the ALF/LUA research grant in Gothenburg, the Lundberg Foundation, the Torsten and Ragnar Söderberg's Foundation, the Västra Götaland Foundation, the Göteborg Medical Society, the Novo Nordisk foundation, and the European Commission grant HEALTH-F2-2008-201865-GEFOS.                                                                                                                 | Financial support was received from the Swedish Research Council (K2010-54X-09894-19-3, 2006-3832 and K2010-52X-20229-05-3), the Swedish Foundation for Strategic Research, the ALF/LUA research grant in Gothenburg, the Lundberg Foundation, the Torsten and Ragnar Söderberg's Foundation, the Västra Götaland Foundation, the Göteborg Medical Society, the Novo Nordisk foundation, and the European Commission grant HEALTH-F2-2008-201865-GEFOS. We would like to acknowledge Maria Nethander at the genomics core facility at University of Gothenburg for statistical analyses. We would also like to thank Dr. Tobias A. Knoch, Luc V. de Zeeuw, Anis Abuseiris, and Rob de Graaf as well as their institutions the Erasmus Computing Grid, Rotterdam, The Netherlands, and especially the national German MediGRID and Services@MediGRID part of the German D-Grid, both funded by the German Bundesministerium fuer Forschung und Technology under grants #01 AK 803 A-H and # 01 IG 07015 G for access to their grid resources. We would also like to thank Karol Estrada, Department of Internal Medicine, Erasmus MC, Rotterdam, Netherlands for advice regarding the grid resources. |
| <b>HealthABC</b>           | The Intramural Research Program of the NIH, National Institute on Aging. U.S. National Institute of Aging (NIA) contracts N01AG62101, N01AG62103, and N01AG62106. NIA grant 1R01AG032098. The Center for Inherited Disease Research (CIDR). National Institutes of Health contract number HHSN268200782096C.                                                                                                                                                                                                                    | This research was supported in part by the Intramural Research Program of the NIH, National Institute on Aging. This research was supported by the U.S. National Institute of Aging (NIA) contracts N01AG62101, N01AG62103, and N01AG62106. The genome-wide association study was funded by NIA grant 1R01AG032098 to Wake Forest University Health Sciences and genotyping services were provided by the Center for Inherited Disease Research (CIDR). CIDR is fully funded through a federal contract from the National Institutes of Health to The Johns Hopkins University, contract number HHSN268200782096C. We would like to thank the participants of the Health, Aging, and Body Composition Study.                                                                                                                                                                                                                                                                                                                                                                                                                                                                                         |
| <b>HKOS</b>                | Hong Kong Research Grant Council (HKU 768610M); The Bone Health Fund of HKU Foundation; The KC Wong Education Foundation; Small Project Funding (201007176237); Matching Grant, CRCG Grant and Osteoporosis and Endocrine Research Fund, and the Genomics Strategic Research Theme of The University of Hong Kong.                                                                                                                                                                                                              | This project is supported by Hong Kong Research Grant Council (HKU 768610M); The Bone Health Fund of HKU Foundation; The KC Wong Education Foundation; Small Project Funding (201007176237); Matching Grant, CRCG Grant and Osteoporosis and Endocrine Research Fund, and the Genomics Strategic Research Theme of The University of Hong Kong. The authors are very grateful to the participants and clinical staff at the Queen Mary Hospital of The University of Hong Kong.                                                                                                                                                                                                                                                                                                                                                                                                                                                                                                                                                                                                                                                                                                                      |
| <b>MrOS</b>                | The Osteoporotic Fractures in Men (MrOS) Study is supported by National Institutes of Health funding. The following institutes provide support: the National Institute of Arthritis and Musculoskeletal and Skin Diseases (NIAMS), the National Institute on Aging (NIA), the National Center for Research Resources (NCRR), and NIH Roadmap for Medical Research under the following grant numbers: U01 AR45580, U01 AR45614, U01 AR45632, U01 AR45647, U01 AR45654, U01 AR45583, U01 AG18197, U01-AG027810, and U01 RR024140. | We thank all the participants in the Osteoporotic Fractures in Men Study for their continued participation.                                                                                                                                                                                                                                                                                                                                                                                                                                                                                                                                                                                                                                                                                                                                                                                                                                                                                                                                                                                                                                                                                          |
| <b>PROSPER/PHASE study</b> | European Union's Seventh Framework Programme (FP7/2007-2013) under grant agreement n° HEALTH-F2-2009-223004 PHASE.                                                                                                                                                                                                                                                                                                                                                                                                              | The research leading to these results has received funding from the European Union's Seventh Framework Programme (FP7/2007-2013) under grant agreement n° HEALTH-F2-2009-223004 PHASE.                                                                                                                                                                                                                                                                                                                                                                                                                                                                                                                                                                                                                                                                                                                                                                                                                                                                                                                                                                                                               |
| <b>SOF</b>                 | The Study of Osteoporotic Fractures (SOF) is supported by National Institutes of Health funding. The National Institute on Aging (NIA) and the National Institute of Arthritis and Musculoskeletal and Skin Diseases (NIAMS) provides support under the following grant numbers: R01 AG005407, R01 AR35582, R01 AR35583, R01 AR35584, R01 AG005394, R01 AG027574, R01 AG027576, and R01 AG026720.                                                                                                                               | We thank the participants and staff who made SOF possible                                                                                                                                                                                                                                                                                                                                                                                                                                                                                                                                                                                                                                                                                                                                                                                                                                                                                                                                                                                                                                                                                                                                            |
| <b>RSI, RSII, RSIII</b>    | Netherlands Organisation of Scientific Research NWO Investments (nr. 175.010.2005.011, 911-03-012); Research Institute for Diseases in the Elderly (014-93-015; RIDE2); Netherlands Genomics Initiative/Netherlands Consortium for Healthy Aging (050-060-810); German Bundesministerium fuer Forschung und Technology under grants #01 AK 803 A-H and # 01 IG 07015 G.                                                                                                                                                         | The GWA study was funded by the Netherlands Organisation of Scientific Research NWO Investments (nr. 175.010.2005.011, 911-03-012), the Research Institute for Diseases in the Elderly (014-93-015; RIDE2), the Netherlands Genomics Initiative (NGI)/Netherlands Consortium for Healthy Aging (NCHA) project nr. 050-060-810. We thank Pascal Arp, Mila Jhamai, Dr Michael Moorhouse, Marijn Verkerk, and Lisbeth Herrera for their help in creating the GWAS database. We also thank Lisette Stolk for her support creating the fracture dataset and members of the GIANT consortium for sharing scripts used in this study. The Rotterdam Study is funded by Erasmus Medical Center and Erasmus University, Rotterdam, Netherlands Organization for the Health Research and Development (ZonMw), the Research Institute for Diseases in the Elderly (RIDE), the Ministry of                                                                                                                                                                                                                                                                                                                       |

| Cohort                         | Funding agencies                                                                                                                                                                                                                                                                                                                                                                                                                                                                                                                                                                                                                                                                                                                                        | Full Acknowledgments                                                                                                                                                                                                                                                                                                                                                                                                                                                                                                                                                                                                                                                                                                                                                                                                  |
|--------------------------------|---------------------------------------------------------------------------------------------------------------------------------------------------------------------------------------------------------------------------------------------------------------------------------------------------------------------------------------------------------------------------------------------------------------------------------------------------------------------------------------------------------------------------------------------------------------------------------------------------------------------------------------------------------------------------------------------------------------------------------------------------------|-----------------------------------------------------------------------------------------------------------------------------------------------------------------------------------------------------------------------------------------------------------------------------------------------------------------------------------------------------------------------------------------------------------------------------------------------------------------------------------------------------------------------------------------------------------------------------------------------------------------------------------------------------------------------------------------------------------------------------------------------------------------------------------------------------------------------|
|                                |                                                                                                                                                                                                                                                                                                                                                                                                                                                                                                                                                                                                                                                                                                                                                         | Education, Culture and Science, the Ministry for Health, Welfare and Sports, the European Commission (DG XII), and the Municipality of Rotterdam. The authors are very grateful to the participants and staff from the Rotterdam Study, particularly L. Buist and J.H. van den Boogert and also the participating general practitioners and pharmacists. We would like to thank Dr. Tobias A. Knoch, Luc V. de Zeeuw, Anis Abuseiris, and Rob de Graaf as well as their institutions the Erasmus Computing Grid, Rotterdam, The Netherlands, and especially the national German MediGRID and Services@MediGRID part of the German D-Grid, both funded by the German Bundesministerium fuer Forschung und Technology under grants #01 AK 803 A-H and # 01 IG 07015 G for access to their grid resources.               |
| <b>TUK1, TUK23</b>             | NIHR Biomedical Research Centre (grant to Guys' and St. Thomas' Hospitals and King's College London); the Chronic Disease Research Foundation; Wellcome Trust ; Canadian Institutes of Health Research, the Canadian Foundation for Innovation, the Fonds de la Recherche en Santé Québec, The Lady Davis Institute, the Jewish General Hospital and Ministère du Développement économique, de l'Innovation et de l'Exportation du Quebec.                                                                                                                                                                                                                                                                                                              | NIHR Biomedical Research Centre (grant to Guys' and St. Thomas' Hospitals and King's College London); the Chronic Disease Research Foundation; Canadian Institutes of Health Research, the Canadian Foundation for Innovation, the Fonds de la Recherche en Santé Québec, The Lady Davis Institute, the Jewish General Hospital and Ministère du Développement économique, de l'Innovation et de l'Exportation du Quebec. Dr. Frances Williams for her contributions to phenotyping in this cohort.                                                                                                                                                                                                                                                                                                                   |
| <b>WGHS</b>                    | The WGHS is supported by the National Heart, Lung, and Blood Institute (HL043851 and HL080467) and the National Cancer Institute (CA047988 and UM1CA182913), the Donald W. Reynolds Foundation, and the Fondation Leducq, with collaborative scientific support and funding for genotyping provided by Amgen                                                                                                                                                                                                                                                                                                                                                                                                                                            | The WGHS is supported by the National Heart, Lung, and Blood Institute (HL043851 and HL080467) and the National Cancer Institute (CA047988 and UM1CA182913), the Donald W. Reynolds Foundation, and the Fondation Leducq, with collaborative scientific support and funding for genotyping provided by Amgen                                                                                                                                                                                                                                                                                                                                                                                                                                                                                                          |
| <b>WHI</b>                     | The WHI program is funded by the National Heart, Lung, and Blood Institute, National Institutes of Health, U.S. Department of Health and Human Services through contracts N01WH22110, 24152, 32100-2, 32105-6, 32108-9, 32111-13, 32115, 32118-32119, 32122, 42107-26, 42129-32, and 44221.                                                                                                                                                                                                                                                                                                                                                                                                                                                             | We thank the institutes, centers and investigators of the Women's Health Initiative (WHI) who developed and implemented the recruitment of participants, and the clinical and laboratory studies for WHI.                                                                                                                                                                                                                                                                                                                                                                                                                                                                                                                                                                                                             |
| <b>Young Finns study (YFS)</b> | The Young Finns Study has been financially supported by the Academy of Finland: grants 286284, 134309 (Eye), 126925, 121584, 124282, 129378 (Salve), 117787 (Gendi), and 41071 (Skidi); the Social Insurance Institution of Finland; Competitive State Research Financing of the Expert Responsibility area of Kuopio, Tampere and Turku University Hospitals (grant X51001); Juho Vainio Foundation; Paavo Nurmi Foundation; Finnish Foundation for Cardiovascular Research ; Finnish Cultural Foundation; Tampere Tuberculosis Foundation; Emil Aaltonen Foundation; Yrjö Jahnsson Foundation; Signe and Ane Gyllenberg Foundation; Diabetes Research Foundation of Finnish Diabetes Association; and EU Horizon 2020 (grant 755320 for TAXINOMISIS). | The Young Finns Study has been financially supported by the Academy of Finland: grants 286284 (T.L), 134309 (Eye), 126925, 121584, 124282, 129378 (Salve), 117787 (Gendi), and 41071 (Skidi); the Social Insurance Institution of Finland; Competitive State Research Financing of the Expert Responsibility area of Tampere, Turku and Kuopio University Hospitals (grant X51001); Juho Vainio Foundation; Paavo Nurmi Foundation; Finnish Foundation for Cardiovascular Research; Finnish Cultural Foundation; Tampere Tuberculosis Foundation; Emil Aaltonen Foundation; Yrjö Jahnsson Foundation; Signe and Ane Gyllenberg Foundation; and Diabetes Research Foundation of Finnish Diabetes Association. The expert technical assistance in the statistical analyses by Irina Lisinen is gratefully acknowledged. |
| <b>23andMe</b>                 |                                                                                                                                                                                                                                                                                                                                                                                                                                                                                                                                                                                                                                                                                                                                                         | We thank the customers of 23andMe who consented to participate in research and answered surveys. We also thank all the employees of 23andMe, who together have made this research possible.                                                                                                                                                                                                                                                                                                                                                                                                                                                                                                                                                                                                                           |
| <b>APOSS</b>                   |                                                                                                                                                                                                                                                                                                                                                                                                                                                                                                                                                                                                                                                                                                                                                         | We are extremely grateful for the hard work of the clinical research staff in the Musculoskeletal Research Programme and to all the women who kindly participated in the study. Sample collection and analysis was supported in part by grants from the European Commission (QLRT-2001-02629) and the UK Food Standards Agency.                                                                                                                                                                                                                                                                                                                                                                                                                                                                                       |
| <b>AROS</b>                    |                                                                                                                                                                                                                                                                                                                                                                                                                                                                                                                                                                                                                                                                                                                                                         | The authors are very grateful to the participants and staff from the AROS Study.                                                                                                                                                                                                                                                                                                                                                                                                                                                                                                                                                                                                                                                                                                                                      |
| <b>BARCOS</b>                  | Red de Envejecimiento y fragilidad RETICEF, CIBERER, Instituto Carlos III. Fondos FEDER. Fondo de Investigación Sanitaria (FIS PI13/00116). Spanish Ministry of Education and Science (SAF2014-56562-R), Catalan Government (2014SGR932).                                                                                                                                                                                                                                                                                                                                                                                                                                                                                                               | Red de Envejecimiento y fragilidad RETICEF, CIBERER, Instituto Carlos III. Fondos FEDER. Fondo de Investigación Sanitaria (FIS PI13/00116). Spanish Ministry of Education and Science (SAF2014-56562-R). Catalan Government (2014SGR932).                                                                                                                                                                                                                                                                                                                                                                                                                                                                                                                                                                             |



| Cohort                       | Funding agencies                                                                                                                                                                                                                                                                                                                                                                                                                                                | Full Acknowledgments                                                                                                                                                                                                                                                                                                                                                                                                                                                                                                                                                                                                                                                                                                                                                                                                                                                                                                                                                                                                                                                                                                                                                                                                                                                                                 |
|------------------------------|-----------------------------------------------------------------------------------------------------------------------------------------------------------------------------------------------------------------------------------------------------------------------------------------------------------------------------------------------------------------------------------------------------------------------------------------------------------------|------------------------------------------------------------------------------------------------------------------------------------------------------------------------------------------------------------------------------------------------------------------------------------------------------------------------------------------------------------------------------------------------------------------------------------------------------------------------------------------------------------------------------------------------------------------------------------------------------------------------------------------------------------------------------------------------------------------------------------------------------------------------------------------------------------------------------------------------------------------------------------------------------------------------------------------------------------------------------------------------------------------------------------------------------------------------------------------------------------------------------------------------------------------------------------------------------------------------------------------------------------------------------------------------------|
| <b>Austrios-A Austrios-B</b> | This work was supported by BioPersMed (COMET K project 825329), and the Competence Center CBmed (COMET K1 centre 844609), funded by the Austrian Federal Ministry of Transport, Innovation and Technology (BMVIT) and the Austrian Federal Ministry of Economics and Labour/the Federal Ministry of Economy, Family and Youth (BMWA/BMWFJ) and the Styrian Business Promotion Agency (SFG).                                                                     |                                                                                                                                                                                                                                                                                                                                                                                                                                                                                                                                                                                                                                                                                                                                                                                                                                                                                                                                                                                                                                                                                                                                                                                                                                                                                                      |
| <b>Cabrio-C, Cabrio-CC</b>   | Instituto de Salud Carlos III-Fondo de Investigaciones Sanitarias Grants PI 06/34,PI09/539, PI12/615 and PI15/521 (that could be confunded by European Union-FEDER funds).                                                                                                                                                                                                                                                                                      | Instituto de Salud Carlos III-Fondo de Investigaciones Sanitarias (PI 06/34,PI09/539, PI12/615,PI15/521).We acknowledge the inputs and help of D. Nan, J. Castillo, M.I. Pérez-Núñez and the staff of the Centro de Salud Jose Barros. We also thank the technical assistance of C. Sañudo and J. Arozamena. C. Sañudo was funded by Instituto de Inbestigación Valdecilla (IDIVAL)                                                                                                                                                                                                                                                                                                                                                                                                                                                                                                                                                                                                                                                                                                                                                                                                                                                                                                                  |
| <b>CAIFOS</b>                | Healthway Health Promotion Foundation of Western Australia, Australasian Menopause Society and the Australian National Health and Medical Research Council Project Grant (254627, 303169 and 572604).                                                                                                                                                                                                                                                           | Healthway Health Promotion Foundation of Western Australia, Australasian Menopause Society and the Australian National Health and Medical Research Council Project Grant (254627, 303169 and 572604).This CAIFOS study was supported by the Healthway Health Promotion Foundation of Western Australia, Australasian Menopause Society and the Australian National Health and Medical Research Council Project Grant (254627, 303169 and 572604). The salary of Dr Lewis is supported by a National Health and Medical Research Council of Australia Career Development Fellowship.                                                                                                                                                                                                                                                                                                                                                                                                                                                                                                                                                                                                                                                                                                                  |
| <b>Calex-family</b>          |                                                                                                                                                                                                                                                                                                                                                                                                                                                                 | Mr. Leiting Xu, Ms. Shumei Cheng and Professor Marku Alen.                                                                                                                                                                                                                                                                                                                                                                                                                                                                                                                                                                                                                                                                                                                                                                                                                                                                                                                                                                                                                                                                                                                                                                                                                                           |
| <b>CaMos</b>                 | CaMos was supported by a grant from the Canadian Institutes for Health Research(CIHR)(grant number MOP111103)                                                                                                                                                                                                                                                                                                                                                   | We thank all participants for having given their consent to the study.                                                                                                                                                                                                                                                                                                                                                                                                                                                                                                                                                                                                                                                                                                                                                                                                                                                                                                                                                                                                                                                                                                                                                                                                                               |
| <b>DOES (Dubbio)</b>         | The Dubbo Osteoporosis Epidemiology Study was supported by the Australian National Health and Medical Research Council, MBF Living Well foundation, the Ernst Heine Family Foundation and from untied educational grants from Amgen, Eli Lilly International, GE-Lunar, Merck Australia, Novartis, Sanofi-Aventis Australia and Servier. The OPUS study was supported by Sanofi-Aventis, Eli Lilly, Novartis, Pfizer, Proctor&Gamble Pharmaceuticals and Roche. |                                                                                                                                                                                                                                                                                                                                                                                                                                                                                                                                                                                                                                                                                                                                                                                                                                                                                                                                                                                                                                                                                                                                                                                                                                                                                                      |
| <b>DOPS</b>                  |                                                                                                                                                                                                                                                                                                                                                                                                                                                                 | The authors are very grateful to the participants and staff from the DOPS Study. We would like to thank Prof. Leif Mosekilde, Prof. Kim Brixen, Dr. Jens-Erik Beck Jensen and Dr. Pia Eiken as well as their institutions.                                                                                                                                                                                                                                                                                                                                                                                                                                                                                                                                                                                                                                                                                                                                                                                                                                                                                                                                                                                                                                                                           |
| <b>EDOS</b>                  | The EDOS study was supported by a grant from Arthritis Research UK (grant number 15389).                                                                                                                                                                                                                                                                                                                                                                        | The EDOS study was supported by a grant from Arthritis Research UK (grant number 15389).                                                                                                                                                                                                                                                                                                                                                                                                                                                                                                                                                                                                                                                                                                                                                                                                                                                                                                                                                                                                                                                                                                                                                                                                             |
| <b>EPOS</b>                  |                                                                                                                                                                                                                                                                                                                                                                                                                                                                 | EU Biomed 1 (BMHICT920182, CIPDCT925012, ERBC1PDCT 940229, ERBC1PDCT930105), Medical Research Council G9321536 and G9800062, Wellcome Trust collaborative Research Initiative 1995, MAFF AN0523,EU FP5 (QLK6-CT-2002-02629), Food Standards Agency N05046, GEFOS EU FP7 Integrated Project Grant Reference: 201865 The UK's NIMR Biomedical Research Centre Grant to Cambridge contributed to the costs of genotyping.The European Prospective Osteoporosis Study (1992-) was the prospective phase of the European Vertebral Osteoporosis Study, initiated by Alan J Silman who continued as the joint coordinator of EPOS. Particular thank are due to Terry O'Neill, Mark Lunt and Joe Finn for managing the collection of phenotypic data in Manchester and Jon Power for lab support. The PIs of the EPOS Centres contributing to the GENOMOS initiative and their excellent and enthusiastic staff are thanked for their energetic contributions to local fund-raising and excellent data collection efforts as well as collecting blood for DNA from their subjects: J Bruges Armas, A Bhalla, G Poor, R Nuti, A Lopes Vaz, L Benevolenskaya, S Grazio, K Weber, T Miazgowski, J J Stepan, J da Silva, P Masaryk, F Galan Galan, S Boonen, S Havelka, G Lyritis, M Naves Diaz, R Perez Cano . |
| <b>GEOS</b>                  | Canadian Institutes for health research operating grant funding reference #86748.                                                                                                                                                                                                                                                                                                                                                                               | Financial support was provided by the Canadian Institutes for Health Research(Funding reference #86748). Infrastructure support to the various research centers was provided by the Fonds de Recherche en Santé du Quebec. François Rousseau holds a Fonds de la Recherche en Santé du Québec / MSSS Research Chair in Health Technology Assessment and Evidence Based Laboratory Medicine. We thank Cynthia Roy and Johanne Bussièrès for technical assistance.                                                                                                                                                                                                                                                                                                                                                                                                                                                                                                                                                                                                                                                                                                                                                                                                                                     |

| Cohort             | Funding agencies                                                                                                                                                                                                                                                                                                                                                                                                                                               | Full Acknowledgments                                                                                                                                                                                                                                                                                                                                                                                                                                                                                                                                                                                                                                                                                           |
|--------------------|----------------------------------------------------------------------------------------------------------------------------------------------------------------------------------------------------------------------------------------------------------------------------------------------------------------------------------------------------------------------------------------------------------------------------------------------------------------|----------------------------------------------------------------------------------------------------------------------------------------------------------------------------------------------------------------------------------------------------------------------------------------------------------------------------------------------------------------------------------------------------------------------------------------------------------------------------------------------------------------------------------------------------------------------------------------------------------------------------------------------------------------------------------------------------------------|
| <b>GROS SUDY</b>   | University of Athens, Greece (Kapodistrias 2009) .                                                                                                                                                                                                                                                                                                                                                                                                             | The GROS study was supported partially by a research grant (Kapodistrias 2009, University of Athens, Greece). We would like to thank the participants and staff from the Department of Orthopaedics, University Hospital of Thessalia, Larissa, Greece. The authors are very grateful to Mrs. Samara S. and Mr. Chassanidis C.                                                                                                                                                                                                                                                                                                                                                                                 |
| <b>HCS</b>         | The study was supported by the MRC of the United Kingdom; Arthritis Research UK; NIHR Musculoskeletal BRU Oxford; NIHR Nutrition BRC Southampton'                                                                                                                                                                                                                                                                                                              | Medical Research Council; Arthritis Research UK; NIHR Musculoskeletal BRU Oxford; NIHR Nutrition BRU Southampton.                                                                                                                                                                                                                                                                                                                                                                                                                                                                                                                                                                                              |
| <b>Hong Kong</b>   | The projects have been supported by The Hong Kong Jockey Club Charities Trust, VC discretionary fund of The Chinese University of Hong Kong and Research Grants Council Earmarked Grant CUHK4101/02M.                                                                                                                                                                                                                                                          | The projects have been supported by The Hong Kong Jockey Club Charities Trust, VC discretionary fund of The Chinese University of Hong Kong and Research Grants Council Earmarked Grant CUHK4101/02M.                                                                                                                                                                                                                                                                                                                                                                                                                                                                                                          |
| <b>KorAMC</b>      | A grant of the Korea Health Technology R&D Project, the Ministry of Health & Welfare, Republic of Korea (Project No.: HI14C2258); A grant of the Korea Health Technology R&D Project, the Ministry of Health & Welfare, Republic of Korea (Project No.: HI15C0377)                                                                                                                                                                                             | A grant of the Korea Health Technology R&D Project, the Ministry of Health & Welfare, Republic of Korea (Project No.: HI14C2258), and by a grant of the Korea Health Technology R&D Project, the Ministry of Health & Welfare, Republic of Korea (Project No.: HI15C0377)                                                                                                                                                                                                                                                                                                                                                                                                                                      |
| <b>LASA</b>        | The Longitudinal Aging Study Amsterdam is largely supported by a grant from the Netherlands Ministry of Health Welfare and Sports, Directorate of Long-Term Care.                                                                                                                                                                                                                                                                                              | The Longitudinal Aging Study Amsterdam is largely supported by a grant from the Netherlands Ministry of Health Welfare and Sports, Directorate of Long-Term Care.                                                                                                                                                                                                                                                                                                                                                                                                                                                                                                                                              |
| <b>MOFS</b>        | Financial support was received from the European Union Strategic Educational Pathways Scholarship scheme (STEPS).                                                                                                                                                                                                                                                                                                                                              | We thank Professor Mark Brincaat, Mr Raymond Gatt, Dr Anthony Fionini, Dr Raymond Galea, Dr Heidi Gauci Grech and the staff at the Bone Density Unit, Gynaecology Outpatients, Orthopaedic wards and Orthopaedic outpatients at Mater Dei Hospital and the staff at Karin Grech Rehabilitation Hospital for their assistance with recruitment of research subjects; Dr Pierre Demicoli and Dr Thomas Fuerst regarding BMD data; Dr Stephanie Bezzina-Wettinger, Dr Rosienne Farrugia and Dr Joseph Borg for technical assistance. We also thank all the women who participated in our study. Financial support was received from the European Union Strategic Educational Pathways Scholarship scheme (STEPS). |
| <b>MrOS Sweden</b> | Financial support was received from the Swedish Research Council (K2010-54X-09894-19-3, 2006-3832), the Swedish Foundation for Strategic Research, the ALF/LUA research grant in Gothenburg, the Lundberg Foundation, the Torsten and Ragnar Söderberg's Foundation, the Västra Götaland Foundation, the Göteborg Medical Society, the Novo Nordisk foundation and the European Commission grant HEALTH-F2-2008-201865-GEFOS.                                  | Financial support was received from the Swedish Research Council (K2010-54X-09894-19-3, 2006-3832), the Swedish Foundation for Strategic Research, the ALF/LUA research grant in Gothenburg, the Lundberg Foundation, the Torsten and Ragnar Söderberg's Foundation, the Västra Götaland Foundation, the Göteborg Medical Society, the Novo Nordisk foundation and the European Commission grant HEALTH-F2-2008-201865-GEFOS.                                                                                                                                                                                                                                                                                  |
| <b>NOSOS</b>       |                                                                                                                                                                                                                                                                                                                                                                                                                                                                | We are grateful to everyone who helped with NOSOS study recruitment, data and sample collection (radiographers, research nurses, administration staff, clinicians, technicians and research assistants) at both the Aberdeen and Dingwall centres, as well as Dr Malcolm Steven, who assisted with original participant access at the Dingwall centre. Finally, we are extremely grateful to all the women who took part in this study.                                                                                                                                                                                                                                                                        |
| <b>OAS</b>         | World Anti-Doping Agency, the Danish Ministry of Culture, Institute of Clinical Research of the University of Southern Denmark.                                                                                                                                                                                                                                                                                                                                | Eveline Boudin is thanked for managing DNA samples and the World Anti-Doping Agency, the Danish Ministry of Culture, and Institute of Clinical Research of the University of Southern Denmark are thanked for financial support.                                                                                                                                                                                                                                                                                                                                                                                                                                                                               |
| <b>OSTEOS</b>      |                                                                                                                                                                                                                                                                                                                                                                                                                                                                | We thank all participants for given their consent to the study                                                                                                                                                                                                                                                                                                                                                                                                                                                                                                                                                                                                                                                 |
| <b>OPRA</b>        | This work was supported by grants from the Swedish Research Council (K2012-52X-14691-10-3), FAS (2007-2125), Greta and Johan Kock Foundation, A. Pålsson Foundation, A. Osterlund Foundation, the H Järnhardt foundation, King Gustav V and Queen Victoria Foundation, Åke Wiberg Foundation, Thelma Zoegas Foundation, The Swedish Rheumatism Association, Skåne University Hospital Research Fund, Research and Development Council of Region Skåne, Sweden. | Thanks are extended to the research nurses at the Clinical and Molecular Osteoporosis Research Unit, Malmö and to all the women who kindly participated in the study.                                                                                                                                                                                                                                                                                                                                                                                                                                                                                                                                          |
| <b>SLO-PREV</b>    | Slo-preval cohort was created as part of projects financially supported by Slovenian research agency: P3-298 Geni, Hormoni in osebnostne spremembe pri hormonskih motnjah; Z1-3238: Genski in okoljski dejavniki tveganja za razvoj motnje pri remodelaciji kosti; , J2-3314 Genetski faktorji in hormoni pri presnovnih boleznih and J3-2330 Genetski dejavniki pri osteoporozi.                                                                              | We are grateful to clinicians, researchers, technicians and nurses at Faculty of pharmacy and Clinical centre worked at subject's recruitments and sample processing. Especially we are grateful to prof. Andreja Kocijančič who was founder of osteoporosis research in Slovenia.                                                                                                                                                                                                                                                                                                                                                                                                                             |
| <b>TWINGENE</b>    | We thank Martha Widger and Cody Xuereb for research assistance. This work was supported in part by the Ragnar Söderberg Foundation (E9/11); the National Science Foundation (EARly Concept Grants for Exploratory Research:                                                                                                                                                                                                                                    | We express our profound thanks to all the study participants who contributed to this research                                                                                                                                                                                                                                                                                                                                                                                                                                                                                                                                                                                                                  |

| Cohort            | Funding agencies                                                                                                                                                                                                                                                                                                                                                                                                                                                                                                                                                                                                                                                                                                                                                                                                                                                                                                                                                                                                                            | Full Acknowledgments                                                                                                                                                                                                                                                                                                                                                                                                                                                                                                                                                                                                                                                                                                                                                                                                       |
|-------------------|---------------------------------------------------------------------------------------------------------------------------------------------------------------------------------------------------------------------------------------------------------------------------------------------------------------------------------------------------------------------------------------------------------------------------------------------------------------------------------------------------------------------------------------------------------------------------------------------------------------------------------------------------------------------------------------------------------------------------------------------------------------------------------------------------------------------------------------------------------------------------------------------------------------------------------------------------------------------------------------------------------------------------------------------|----------------------------------------------------------------------------------------------------------------------------------------------------------------------------------------------------------------------------------------------------------------------------------------------------------------------------------------------------------------------------------------------------------------------------------------------------------------------------------------------------------------------------------------------------------------------------------------------------------------------------------------------------------------------------------------------------------------------------------------------------------------------------------------------------------------------------|
|                   | <p>“Workshop for the Formation of a Social Science Genetic Association Consortium”, SES-1064089) as supplemented by the National Institutes of Health’s (NIH) Office of Behavioral and Social Sciences Research, and the National Institute on Aging/NIH through Grants P01-AG005842, P01-AG005842-20S2, P30-AG012810, and T32-AG000186-23 to the National Bureau of Economic Research. The Swedish Twin Registry is supported by the Swedish Department of Higher Education, the European Commission European Network for Genetic and Genomic Epidemiology [ENGAGE:7th Framework Program (FP7/2007-2013)/Grant agreement HEALTH-F4-2007-201413; and GenomEUtwin: 5th Framework program “Quality of Life and Management of the Living Resources” Grant QLG2-CT-2002-01254]; the NIH (DK U01-066134); the Swedish Research Council (M-2005-1112 and 2009-2298); the Swedish Foundation for Strategic Research (ICA08-0047); the Jan Wallander and Tom Hedelius Foundation; and the Swedish Council for Working Life and Social Research.</p> |                                                                                                                                                                                                                                                                                                                                                                                                                                                                                                                                                                                                                                                                                                                                                                                                                            |
| <p><b>UFO</b></p> | <p>The Umeå Fracture and Osteoporosis Study (UFO) is supported by the Swedish Research Council (K20006-72X-20155013), the Swedish Sports Research Council (87/06), the Swedish Society of Medicine, the Kempe-Foundation (JCK-1021), and by grants from the Medical Faculty of Umeå University (ALFVLL:968:22-2005, ALFVL:937-2006,ALFVLL:223:11-2007, ALFVLL:78151-2009) and from the county council of Västerbotten (Spjutspetsanslag VLL:159:33-2007)</p>                                                                                                                                                                                                                                                                                                                                                                                                                                                                                                                                                                                | <p>The Umeå Fracture and Osteoporosis Study (UFO) is supported by the Swedish Research Council (K20006-72X-20155013), the Swedish Sports Research Council (87/06), the Swedish Society of Medicine, the Kempe-Foundation (JCK-1021), and by grants from the Medical Faculty of Umeå University (ALFVLL:968:22-2005, ALFVLL:937-2006, ALFVLL :223:11-2007, ALFVLL:78151-2009) and from the county council of Västerbotten (Spjutspetsanslag VLL:159:33-2007). We thank Åsa Ågren, Hubert Sjödin and Magnus Hellström for skull full data processing and for help creating the UFO database and Kerstin Enquist and Ann-Marie Åhrén for their help in preparing samples for genotyping. We would also like to thank the participants and staff from the NSHDS cohort study and all collaborators in the UFO study group.</p> |
